# Supplementary material for: Mode of birth and long-term sexual health: a follow-up study of mothers in the Danish National Birth Cohort
Source: PubMed Central journal article supplement — BMJ Open. 2019 Nov 3;9(11):e029517. doi: 10.1136/bmjopen-2019-029517 (PMC6858091; doi:10.1136/bmjopen-2019-029517), 2019-11-03
Supplement: bmjopen-2019-029517.draft_revisions.pdf [file bmjopen-2019-029517.draft_revisions.pdf]

# BMJ Open

BMJ Open is committed to open peer review. As part of this commitment we make the peer review history of every article we publish publicly available.

When an article is published we post the peer reviewers' comments and the authors' responses online. We also post the versions of the paper that were used during peer review. These are the versions that the peer review comments apply to.

The versions of the paper that follow are the versions that were submitted during the peer review process. They are not the versions of record or the final published versions. They should not be cited or distributed as the published version of this manuscript.

BMJ Open is an open access journal and the full, final, typeset and author-corrected version of record of the manuscript is available on our site with no access controls, subscription charges or pay-per-view fees (<http://bmjopen.bmj.com>).

If you have any questions on BMJ Open's open peer review process please email [info.bmjopen@bmj.com](mailto:info.bmjopen@bmj.com)

# BMJ Open

## Mode of birth and long-term sexual health – follow-up of the Danish National Birth Cohort

|                               |                                                                                                                                                                                                                                                                                                                                                                                                                                                                                                                                                                                                                                                                                                                                                                |
|-------------------------------|----------------------------------------------------------------------------------------------------------------------------------------------------------------------------------------------------------------------------------------------------------------------------------------------------------------------------------------------------------------------------------------------------------------------------------------------------------------------------------------------------------------------------------------------------------------------------------------------------------------------------------------------------------------------------------------------------------------------------------------------------------------|
| Journal:                      | <i>BMJ Open</i>                                                                                                                                                                                                                                                                                                                                                                                                                                                                                                                                                                                                                                                                                                                                                |
| Manuscript ID                 | bmjopen-2019-029517                                                                                                                                                                                                                                                                                                                                                                                                                                                                                                                                                                                                                                                                                                                                            |
| Article Type:                 | Original research                                                                                                                                                                                                                                                                                                                                                                                                                                                                                                                                                                                                                                                                                                                                              |
| Date Submitted by the Author: | 29-Jan-2019                                                                                                                                                                                                                                                                                                                                                                                                                                                                                                                                                                                                                                                                                                                                                    |
| Complete List of Authors:     | Hjorth, Sarah; Syddansk Universitet, Department of Clinical Research, Research Unit of Obstetrics and Gynecology; Universitetet i Oslo, Department of Pharmacy<br>Kirkegaard, Helene; University of Southern Denmark , Department of Clinical Research, Research Unit of Obstetrics and Gynecology<br>Olsen, Jørn; Aarhus University, Department of Clinical Epidemiology; University of California Los Angeles, Department of Epidemiology, Fielding School of Public Health<br>Thornton, Jim; University of Nottingham<br>Nøhr, Ellen; Syddansk Universitet Det Sundhedsvidenskabelige Fakultet, Department of Clinical Research, Research Unit of Obstetrics and Gynecology; University of South-Eastern Norway, Centre of Women's, Family and Child Health |
| Keywords:                     | OBSTETRICS, EPIDEMIOLOGY, PUBLIC HEALTH                                                                                                                                                                                                                                                                                                                                                                                                                                                                                                                                                                                                                                                                                                                        |
|                               |                                                                                                                                                                                                                                                                                                                                                                                                                                                                                                                                                                                                                                                                                                                                                                |

SCHOLARONE™  
Manuscripts

# Mode of birth and long-term sexual health

## – follow-up of the Danish National Birth Cohort

Sarah Hjorth MSc<sup>1,2</sup>, Helene Kirkegaard PhD<sup>1</sup>, Jørn Olsen PhD<sup>3</sup>, Jim G Thornton MD<sup>4</sup>,  
Ellen A Nohr PhD<sup>1,5</sup>

<sup>1</sup> Research Unit of Gynecology and Obstetrics, Department of Clinical Research, University of Southern Denmark, Odense, Denmark

<sup>2</sup> Current address: PharmacoEpidemiology and Drug Safety Research Group, Department of Pharmacy, Faculty of Mathematics and Natural Sciences, University of Oslo, Oslo, Norway

<sup>3</sup> Department of Clinical Epidemiology, Aarhus University Hospital, Aarhus, Denmark

<sup>4</sup> Department of Child Health, Obstetrics and Gynaecology, University of Nottingham, Nottingham, UK

<sup>5</sup> Centre of Women's, Family and Child Health, University of South-Eastern Norway, Kongsberg, Norway

Word count: 3 093 words

Correspondence to

Sarah Hjorth

PharmacoEpidemiology and Drug Safety Research Group, Department of Pharmacy, Faculty of

Mathematics and Natural Sciences, University of Oslo, P.O 1068, Blindern, 0316 Oslo, Norway

email: [s.h.andersen@farmasi.uio.no](mailto:s.h.andersen@farmasi.uio.no)

telephone : +45 50564818

## ABSTRACT

### Objectives

To investigate the relation between mode of birth and women's long-term sexual health.

### Design

Maternal follow-up of the Danish National Birth Cohort (1996-2002) in 2013-2014 including questions on sexual health. Logistic regression was used to relate registry-based information about mode of birth and perineal tears with data on sexual problems.

### Setting

Denmark.

### Participants

Of 82 569 eligible mothers in the Danish National Birth Cohort, 43 639 (53%) completed the follow-up. Of these, 37 417 women had a partner at follow-up, and answered at least one question on sexual health.

### Main outcome measures

Self-reported sexual health.

### Results

Participants were on average 44 years old, and 16 years after their first birth. The frequency of sexual problems among women with only spontaneous vaginal deliveries, the reference group, was 37%. For women who only had caesarean births, more problems were reported (OR 1.18; 95% CI 1.09 to 1.28). For women who had a spontaneous vaginal birth subsequent to a caesarean, as well as for women with only vaginal births who had experienced one or more instrumental vaginal deliveries, the odds of sexual problems did not differ from women with only spontaneous vaginal births (OR 1.00; 95% CI 0.91 to 1.11) and (OR 1.01; 95% CI 0.95 to 1.08) respectively.

### Conclusions

1  
2 These findings indicate that caesarean section does not protect against long-term sexual problems. The  
3 data from women who had a vaginal birth after a caesarean section suggests that vaginal birth is  
4 protective of long-term sexual problems rather than caesarean section causing them.  
5  
6

## 7 **Keywords**

8 Mode of birth, sexual health, caesarean section, dyspareunia, Danish National Birth Cohort  
9  
10  
11

## 12 **STRENGTHS AND LIMITATIONS OF THIS STUDY**

- 14 • This study is the largest study on mode of birth and long-term sexual health to date with 37 417  
15 participants, allowing for a detailed investigation of the exposure.
- 16 • Information on mode of birth was obtained from registries, limiting the risk of differential  
17 misclassification.
- 18 • Non-participation in the maternal follow-up was 47%, which may limit the generalisability of  
19 the study.
- 20 • Residual confounding, including confounding by birth route indication, cannot be ruled out, but  
21 the results were stable in sensitivity analyses.  
22  
23  
24  
25  
26  
27  
28  
29

## 30 **INTRODUCTION**

31 Sexual health is an important part of reproductive health,<sup>1</sup> and quality of life.<sup>2</sup> It is influenced by many  
32 factors, including women's reproductive history.<sup>3</sup> Short term studies have shown that mode of birth,  
33 and perineal injury are associated with sexual problems up to 18 months post-partum.<sup>3-6</sup> Although the  
34 only randomised trial of mode of birth, where one group of women was allocated to planned caesarean  
35 section and the other to planned vaginal birth, reported no significant differences after two years of  
36 follow-up, the point estimates for pain and being unhappy during sex marginally favoured caesarean  
37 birth.<sup>7</sup> There is also a widespread lay belief that caesarean birth, perhaps by maintaining vaginal tone,  
38 or avoiding perineal injury, might improve sexual function.  
39  
40  
41  
42  
43  
44  
45  
46

47 The results of longer-term studies are inconsistent.<sup>8-12</sup> One found reduced desire in women with  
48 previous instrumental birth, and reduced lubrication in women with a history including both caesarean  
49 section and vaginal birth.<sup>12</sup> Another reported no associations between mode of birth and sexual  
50 problems.<sup>10</sup> For women with anal sphincter tears, some studies found no effect,<sup>9,12</sup> while others  
51 observed a higher prevalence of reduced lubrication<sup>10</sup> or dyspareunia.<sup>11</sup>  
52  
53  
54  
55  
56  
57  
58  
59  
60

1  
2  
3  
4 We investigated the associations between reproductive history and long-term sexual problems in a  
5 large cohort of Danish mothers. Our hypotheses were that instrumental vaginal birth would be  
6 associated with a higher risk of sexual problems than spontaneous birth whereas caesarean section  
7 would not, and that women with birth induced perineal injuries would have more sexual problems than  
8 women without.  
9  
10  
11  
12

## 13 14 **METHODS**

### 15 **Data sources**

16  
17 The study was based on data from the Danish National Birth Cohort.<sup>13,14</sup> The cohort enrolled 91 386  
18 women in early pregnancy between 1996 and 2002, about 30% of births in that period.<sup>15</sup> The first  
19 interview, conducted around week 16 of gestation, included information on health, lifestyle, and socio-  
20 occupational factors. Participants consented to use of their information from Danish health and social  
21 registries. Between December 2013 and December 2014, participants were invited to respond to a  
22 questionnaire on physical, mental, and sexual health. Altogether, 53% (43 639 women) of eligible  
23 mothers participated.<sup>16</sup>  
24  
25  
26  
27  
28  
29  
30

31 Under Danish law, ethical permission is not required for public registry-based studies.<sup>17</sup> The Danish  
32 National Birth Cohort was initially approved by the Committee on Biomedical Research Ethics  
33 (reference no. [KF] 01-471/94) and all participants gave written, informed consent. This study was also  
34 approved by the Danish Data Protection Agency (approval no. 2014-41-2848).  
35  
36  
37  
38  
39

### 40 **Outcome**

41 The outcome was self-reported sexual health. Participants provided information about whether their  
42 sexual needs had been met in the past year, the frequency of sexual activity with a partner, their  
43 experience of dyspareunia, vaginismus, insufficient lubrication, and difficulty in getting an orgasm.  
44 They were also asked about sexual desire, and whether any lack of desire was considered problematic  
45 by them or their partner. Questions were adapted from the Danish National Health Survey<sup>18</sup>  
46 (supplemental table 1).  
47  
48  
49  
50  
51  
52  
53  
54  
55  
56  
57  
58  
59  
60

1  
2 Four types of sexual difficulties were dichotomised into the presence or absence of a sexual problem in  
3 the past year. Reduced lubrication or difficulty in achieving orgasm were considered a problem if the  
4 women had answered that they 'often' or 'always' had experienced these difficulties during sex with  
5 their partner. Dyspareunia was classified by location, at the vaginal introitus (entry dyspareunia) and/or  
6 deep in the abdomen (deep dyspareunia), and considered a problem if women reported that  
7 they 'sometimes', 'often' or 'always' had either type. In addition, we defined frequent dyspareunia if it  
8 was present 'often' or 'always'. Reduced sexual desire was considered a problem if women both  
9 'sometimes', 'often' or 'always' experienced it, and also considered it a problem. All four specific  
10 sexual problems (reduced lubrication, difficulty in achieving orgasm, dyspareunia, and reduced sexual  
11 desire) were combined in one outcome, 'the presence or absence of one or more sexual problems  
12 within the past year'.  
13  
14  
15  
16  
17  
18  
19  
20  
21

## 22 **Exposures**

23  
24 Exposures were mode of birth and perineal tears from the woman's entire reproductive history. These  
25 were obtained from the Danish Medical Birth Registry, which contains data about all live and still  
26 births since 1973,<sup>19</sup> and from the National Patient Registry, which contains data about all contacts with  
27 Danish hospitals since 1977.<sup>20</sup> Registry data up to the date the woman answered the follow-up  
28 questionnaire were linked to cohort participants through personal identification numbers. Mode of birth  
29 was categorised as only spontaneous vaginal births, one or more instrumental vaginal deliveries in  
30 women with only vaginal births, only caesarean sections, one or more spontaneous vaginal births after  
31 a first caesarean section, instrumental vaginal birth in women who birthed vaginally after a first  
32 caesarean section, and caesarean section after vaginal birth.  
33  
34  
35  
36  
37  
38  
39  
40

41  
42 Data on perineal tears were first kept and stored in Denmark in 1994 using ICD10. For this study,  
43 perineal tears were categorised as no tear, first (ICD10 code O70.0), second (O70.1), third (O70.2), or  
44 fourth degree tear (O70.3), or episiotomy (procedure code KTMD00). During the years, the women  
45 from the cohort gave birth, it was common practice to register only sutured tears, and many first degree  
46 tears were left unsutured. No tear and first degree tears were therefore combined into one category. As  
47 fourth degree tears amount to only 1% of perineal tears, they were combined with third degree tears in  
48 a single category 'anal sphincter tear'. Data on third and fourth degree tears analysed separately is  
49  
50  
51  
52  
53  
54  
55  
56  
57  
58  
59  
60

1  
2 available in supplemental table 2. Anal sphincter tear together with an episiotomy was categorised as  
3 the former.  
4

### 7 **Potential covariates**

8  
9 Covariates were chosen a priori based on a literature review, and depicted in directed acyclic graphs<sup>21</sup>  
10 (supplemental figure 1). Maternal age at first birth, and calendar year at first birth were obtained from  
11 the Medical Birth Registry. Information about socio-occupational status, pre-pregnant body mass index  
12 (BMI), mental-, and physical health, and smoking and exercise in pregnancy came from the woman's  
13 first interview in the Danish National Birth Cohort, and was thus related to her first childbirth in the  
14 cohort. For 51% of participants, this was also their first birth. Socio-occupational status was  
15 categorised as high (four or more years of education after high school, or job as manager), middle  
16 (skilled manual work, office or service work), or low (unskilled work or unemployment).<sup>22</sup> Diseases  
17 were defined as those that had been diagnosed by a physician, and included hypertensive disorders,  
18 diseases of the heart, thyroid, or musculoskeletal system, epilepsy, diabetes, gynaecological diseases,  
19 and mental illness. Self-assessed health at the first pregnancy, smoking in pregnancy, and exercise in  
20 pregnancy were categorised as shown in table 1.  
21  
22  
23  
24  
25  
26  
27  
28  
29  
30

### 31 **Study population**

32  
33 Women who participated in the follow-up and answered at least one question on sexual health (n=42  
34 132) were eligible. Two separate analyses were done, one for mode of birth, and one for degree of  
35 perineal tear. Study populations varied slightly in the two analyses (figure 1). For both study  
36 populations, we excluded 4 715 (11%) women without a partner, as they were not considered  
37 comparable with women with a partner when it came to sexual activity and sexual problems. The study  
38 included women with male and/or female partners. This left 37 417 women in the study population for  
39 mode of birth. For the analysis on perineal tears, 3 240 women (8%) who only had caesarean sections,  
40 and 4 920 women (12%) with births before 1994, when degree of perineal tear registration started, were  
41 also excluded, leaving 29 253 women in the study population.  
42  
43  
44  
45  
46  
47  
48  
49

50 *Figure 1 about here*  
51  
52

### 53 **Participant and public involvement**

54  
55  
56  
57  
58  
59  
60



1  
2 Some study participants were involved in developing and testing the questionnaire in the maternal  
3 follow-up. The results of the research conducted in the Danish National Birth Cohort are available at  
4 [www.dnbc.dk](http://www.dnbc.dk).  
5  
6  
7

## 8 **Statistical analysis**

9  
10 To estimate the association between mode of birth, or degree of perineal tear, and the prevalence of  
11 sexual problems, we used logistic regression for calculating odds ratios (ORs) with 95% confidence  
12 intervals (CIs). For mode of birth, the reference group was women who had only delivered  
13 spontaneously. For perineal tears, the reference group was "no tear or first degree tear". Multiple  
14 logistic regressions were adjusted for age, year at first birth, and pre-pregnant BMI as continuous  
15 variables, and socio-occupational status, self-assessed health, disease, exercise, and smoking in  
16 pregnancy as categorical variables. The number of answers available for analysis for each outcome  
17 differed, as the response option 'I do not wish to answer this question' was provided for all questions  
18 on sexual health, and only participants with complete information on exposure and outcome were  
19 analysed. To address missing data on covariates, multivariate imputation by chained equations was  
20 done, and the number of datasets created was 20, as no difference in results was seen when moving  
21 from ten to 20 datasets. As recommended by Sterne et al.,<sup>23</sup> both exposure, outcome, and covariates  
22 with complete information were included in the imputation model. Complete case analyses were done  
23 as well, and the results did not differ substantially from the results based on multiple imputation  
24 (supplemental tables 3 and 4). For non-participants in the maternal follow-up, we also had available  
25 data on mode of birth and degree of tear, and the distributions were compared to that observed in  
26 participants and found to be similar (supplemental table 5). Because some categories of mode of birth  
27 could only include women with more than one child, the categorisation may be seen as a conditioning  
28 on parity or future events. In a sensitivity analysis, we therefore adjusted for parity and year at last  
29 birth, even though they were also considered intermediates in the directed acyclic graph. As vaginismus  
30 is associated with a lower prevalence of vaginal births, a second sensitivity analysis excluded women  
31 with vaginismus. In a third sensitivity analysis, the population was restricted to women who had their  
32 first child in the Danish National Birth Cohort, as women who choose to have another child may  
33 represent a selected group, where women who have the worst experiences of childbirth, or who have  
34 sequelae, are under-represented. All analyses were done using Stata 13.1 (StataCorp, College Station,  
35 Texas, USA).  
36  
37  
38  
39  
40  
41  
42  
43  
44  
45  
46  
47  
48  
49  
50  
51  
52  
53  
54  
55  
56  
57  
58  
59  
60

## RESULTS

The mean age of participants at follow-up was 44 years (SD 4.4), and the mean interval since the women's first birth to the maternal follow-up 16 years (SD 3.8, range 11 to 40 years). Socio-occupational status, BMI, and smoking and exercise practice in pregnancy are shown in table 1. Most women, 23 608 (63%), had delivered all of their children spontaneously. For 6 359 women (17%), their reproductive history included at least one instrumental vaginal birth, almost all of which were vacuum extractions (99%). Some of these women also had a caesarean section in their reproductive history. In 8 806 women (24%), at least one birth had been by caesarean section, and 3 244 women (8%) had only caesarean sections.

**Table 1. Participant characteristics by mode of birth**

|                                                | Mode of birth     |                                              |                                                     |                              |                                  | In<br>V<br>(n) |
|------------------------------------------------|-------------------|----------------------------------------------|-----------------------------------------------------|------------------------------|----------------------------------|----------------|
|                                                | All<br>(n=37 417) | Only spontaneous<br>deliveries<br>(n=23 608) | Instrumental<br>vaginal<br>birth, ever<br>(n=5 003) | Only c-sections<br>(n=3 244) | Spontaneous<br>VBAC<br>(n=2 038) |                |
| <b>Age at first birth, n (%)</b>               |                   |                                              |                                                     |                              |                                  |                |
| <25                                            | 7 140 (19)        | 4 864 (21)                                   | 775 (15)                                            | 363 (11)                     | 356 (17)                         | 73             |
| 25–29                                          | 19 839 (53)       | 12 758 (54)                                  | 2 656 (53)                                          | 1 433 (44)                   | 1 144 (56)                       | 23             |
| 30–34                                          | 8 614 (23)        | 5 063 (21)                                   | 1 280 (26)                                          | 1 024 (32)                   | 465 (23)                         | 12             |
| ≥35                                            | 1 824 (5)         | 923 (4)                                      | 292 (6)                                             | 424 (13)                     | 73 (4)                           | 24             |
| <b>Socio-occupational status, n (%)*</b>       |                   |                                              |                                                     |                              |                                  |                |
| Low                                            | 2 233 (6)         | 1 393 (6)                                    | 265 (6)                                             | 202 (7)                      | 123 (6)                          | 23             |
| Middle                                         | 11 832 (34)       | 7 444 (34)                                   | 1 562 (33)                                          | 1 056 (35)                   | 656 (34)                         | 13             |
| High                                           | 21 059 (60)       | 13 318 (60)                                  | 2 875 (61)                                          | 1 779 (59)                   | 1 133 (59)                       | 20             |
| Missing                                        | 2 293             | 1 453                                        | 301                                                 | 207                          | 126                              | 27             |
| <b>Prepregnant BMI, n (%)*</b>                 |                   |                                              |                                                     |                              |                                  |                |
| <18.5                                          | 1 417 (4)         | 906 (4)                                      | 196 (4)                                             | 87 (3)                       | 82 (4)                           | 20             |
| 18.5–24.9                                      | 24 554 (71)       | 15 991 (73)                                  | 3 275 (70)                                          | 1 843 (62)                   | 1 286 (68)                       | 20             |
| 25.0–29.9                                      | 6 405 (18)        | 3 748 (17)                                   | 899 (19)                                            | 697 (23)                     | 369 (20)                         | 93             |
| ≥30.0                                          | 2 321 (7)         | 1 249 (6)                                    | 278 (6)                                             | 355 (12)                     | 150 (8)                          | 37             |
| Missing                                        | 2 720             | 1 714                                        | 355                                                 | 262                          | 151                              | 33             |
| <b>Exercise in pregnancy, min/week, n (%)*</b> |                   |                                              |                                                     |                              |                                  |                |
| None                                           | 21 156 (60)       | 13 137 (59)                                  | 2 881 (61)                                          | 1 888 (62)                   | 1 149 (60)                       | 27             |
| 1–180                                          | 11 184 (32)       | 7 222 (33)                                   | 1 475 (31)                                          | 900 (30)                     | 615 (32)                         | 13             |
| >180                                           | 2 826 (8)         | 1 825 (8)                                    | 348 (7)                                             | 255 (8)                      | 148 (8)                          | 33             |
| Missing                                        | 2 251             | 1 424                                        | 299                                                 | 201                          | 126                              | 23             |

**Smoking in pregnancy, n (%)\***

|                   |             |             |            |            |            |
|-------------------|-------------|-------------|------------|------------|------------|
| No smoking        | 28 295 (80) | 17 973 (80) | 3 774 (80) | 2 372 (77) | 1 545 (80) |
| Smoking cessation | 3 099 (9)   | 1 892 (8)   | 425 (9)    | 318 (10)   | 173 (9)    |
| Smoking           | 4062 (11)   | 2 489 (11)  | 536 (11)   | 378 (12)   | 222 (11)   |
| Missing           | 1 961       | 1 254       | 268        | 176        | 98         |

**Self-assessed health, n (%)\***

|             |             |             |            |            |            |
|-------------|-------------|-------------|------------|------------|------------|
| Very good   | 19 750 (56) | 12 630 (57) | 2 642 (56) | 1 631 (53) | 1 079 (56) |
| Normal      | 14 578 (41) | 9 056 (41)  | 1 963 (42) | 1 319 (43) | 798 (41)   |
| Not so good | 970 (3)     | 576 (3)     | 116 (2)    | 109 (4)    | 47 (2)     |
| Missing     | 2 119       | 1 346       | 282        | 185        | 114        |

**Presence of disease, n (%)\*†**

|         |             |             |            |            |            |
|---------|-------------|-------------|------------|------------|------------|
| No      | 20 305 (58) | 13 105 (59) | 2 774 (59) | 1 577 (52) | 1 095 (57) |
| Yes     | 14 855 (42) | 9 070 (41)  | 1 932 (41) | 1 468 (48) | 820 (43)   |
| Missing | 2 257       | 1 433       | 297        | 199        | 123        |

\*Percentage of non-missing values.

†Diseases that, according to the women, had been confirmed by a physician, including hypertensive disorders, diseases of the heart, thyroid, or musculoskeletal system, epilepsy, diabetes, gynaecological diseases, and mental illness.

BMI: Body mass index. C-section: Caesarean section. VBAC: Vaginal birth after caesarean section.

Of the 36 691 women who answered the question on sexual needs, 25 289 women (69%) felt that their needs had been met completely or almost completely within the past year (supplemental table 1). Of the 35 710 women who answered all questions on sexual problems, 13 449 (38%) reported one or more sexual problems. Reduced or lacking sexual desire was the most prevalent sexual difficulty, and 7 945 women (22%) had experienced reduced desire to an extent that they found problematic for themselves. Reduced desire to an extent that the women felt was problematic for their partner was experienced by 35%.

**Mode of birth**

Compared to women with only spontaneous vaginal deliveries, there was no evidence for a difference in the prevalence of any sexual problems in women with instrumental vaginal deliveries (table 2). Odds for one or more sexual problems were increased in women who had only delivered by caesarean section (OR 1.18; 95% CI 1.09 to 1.28), in women who had an instrumental vaginal birth after caesarean section (OR 1.35; 95% CI 1.11 to 1.64), and in women who had a caesarean section after vaginal birth (OR 1.10; 95% CI 1.01 to 1.19), but not in women with spontaneous vaginal birth after caesarean section. The specific sexual problems that were more prevalent in women with a history of

caesarean section were reduced lubrication (OR=1.41, 95% CI 1.24 to 1.60) and dyspareunia (OR=1.78, 95% CI 1.59 to 1.99), including frequent dyspareunia (OR=2.82, 95% CI 2.32 to 3.41) (supplemental table 8). When asked about the localisation of the pain, odds ratios for women with only caesarean section were higher for entry dyspareunia (OR=2.76, 95% CI 2.36 to 3.24) than for deep dyspareunia (OR=1.25, 95% CI 1.08 to 1.45).

**Table 2: Sexual problems by mode of birth.**

|                                                 | Only spontaneous deliveries | Instrumental vaginal birth, ever | Only c-sections  | Spontaneous VBAC | Instrumental VBAC |
|-------------------------------------------------|-----------------------------|----------------------------------|------------------|------------------|-------------------|
| <b>One or more sexual problem(s), n=35 710</b>  |                             |                                  |                  |                  |                   |
| Cases (%)                                       | 8 323 (37)                  | 1 788 (37)                       | 1 278 (42)       | 718 (37)         | 194 (45)          |
| Crude OR (95% CI)                               | Reference                   | 1.02 (0.96–1.09)                 | 1.24 (1.15–1.34) | 1.01 (0.92–1.11) | 1.37 (1.14–1.66)  |
| Adjusted OR* (95% CI)                           | Reference                   | 1.01 (0.95–1.08)                 | 1.18 (1.09–1.28) | 1.00 (0.91–1.11) | 1.35 (1.11–1.64)  |
| <b>Reduced desire, n=36 509</b>                 |                             |                                  |                  |                  |                   |
| Cases (%)                                       | 4 981 (22)                  | 1 042 (21)                       | 723 (23)         | 437 (22)         | 106 (24)          |
| Crude OR (95% CI)                               | Reference                   | 0.99 (0.92–1.07)                 | 1.09 (1.00–1.19) | 1.03 (0.92–1.15) | 1.13 (0.91–1.41)  |
| Adjusted OR* (95% CI)                           | Reference                   | 0.99 (0.92–1.07)                 | 1.05 (0.96–1.15) | 1.03 (0.92–1.15) | 1.13 (0.91–1.41)  |
| <b>Difficulty in obtaining orgasm, n=36 019</b> |                             |                                  |                  |                  |                   |
| Cases (%)                                       | 2 861 (13)                  | 641 (13)                         | 421 (14)         | 255 (13)         | 73 (17)           |
| Crude OR (95% CI)                               | Reference                   | 1.07 (0.97–1.17)                 | 1.10 (0.99–1.23) | 1.04 (0.91–1.20) | 1.39 (1.08–1.79)  |
| Adjusted OR* (95% CI)                           | Reference                   | 1.06 (0.96–1.16)                 | 1.06 (0.95–1.18) | 1.04 (0.91–1.19) | 1.38 (1.07–1.78)  |
| <b>Insufficient lubrication, n=36 148</b>       |                             |                                  |                  |                  |                   |
| Cases (%)                                       | 1 700 (7)                   | 383 (8)                          | 344 (11)         | 138 (7)          | 46 (10)           |
| Crude OR (95% CI)                               | Reference                   | 1.07 (0.95–1.20)                 | 1.55 (1.37–1.76) | 0.94 (0.78–1.12) | 1.44 (1.06–1.96)  |
| Adjusted OR* (95% CI)                           | Reference                   | 1.01 (0.90–1.13)                 | 1.41 (1.24–1.60) | 0.92 (0.77–1.10) | 1.35 (0.99–1.85)  |
| <b>Dyspareunia, n=36 266</b>                    |                             |                                  |                  |                  |                   |
| Cases (%)                                       | 2 040 (9)                   | 446 (9)                          | 467 (15)         | 170 (9)          | 57 (13)           |
| Crude OR (95% CI)                               | Reference                   | 1.03 (0.93–1.15)                 | 1.81 (1.62–2.02) | 0.96 (0.82–1.13) | 1.50 (1.13–1.99)  |
| Adjusted OR* (95% CI)                           | Reference                   | 1.05 (0.94–1.17)                 | 1.78 (1.59–1.99) | 0.97 (0.82–1.14) | 1.52 (1.14–2.01)  |
| <b>Entry dyspareunia, n=35 720</b>              |                             |                                  |                  |                  |                   |
| Cases (%)                                       | 640 (3)                     | 160 (3)                          | 243 (8)          | 68 (4)           | 25 (6)            |
| Crude OR (95% CI)                               | Reference                   | 1.19 (1.00–1.42)                 | 2.99 (2.57–3.49) | 1.24 (0.96–1.60) | 2.09 (1.38–3.15)  |
| Adjusted OR* (95% CI)                           | Reference                   | 1.14 (0.96–1.37)                 | 2.76 (2.36–3.24) | 1.24 (0.96–1.59) | 2.03 (1.35–3.07)  |

**Deep dyspareunia, n=35 720**

|                       |           |                  |                  |                  |                  |
|-----------------------|-----------|------------------|------------------|------------------|------------------|
| Cases (%)             | 1 425 (6) | 278 (6)          | 233 (8)          | 102 (5)          | 36 (8)           |
| Crude OR (95% CI)     | Reference | 0.92 (0.80–1.05) | 1.24 (1.07–1.43) | 0.82 (0.67–1.01) | 1.34 (0.95–1.89) |
| Adjusted OR* (95% CI) | Reference | 0.96 (0.84–1.09) | 1.25 (1.08–1.45) | 0.83 (0.67–1.02) | 1.38 (0.98–1.96) |

\*Adjusted for maternal age at first birth, calendar year at first birth, pre-pregnant body mass index, socio-occupational status, self-assessed health, disease, exercise in pregnancy, and smoking in pregnancy.

C-section: Caesarean section; CI: Confidence interval; OR: Odds ratio; VBAC: Vaginal birth after caesarean section.

Among women with one or more vaginal births, 16 404 (56%), had no tear or a first degree tear (supplemental table 10). Episiotomy was frequently used in 1997 to 2002, and 6 615 women (23%) had a second degree tear from a mediolateral episiotomy as their largest tear.

Neither second degree tears nor episiotomies were associated with increased odds of any of the studied sexual problems (table 3). Women with previous episiotomies had lower odds of deep dyspareunia (OR=0.87, 95% CI 0.77 to 0.99) than women with no tear or a first degree tear. Women with previous anal sphincter tears had moderately higher odds of reduced lubrication and entry dyspareunia (OR 1.20, 95% CI 1.01 to 1.43, & OR 1.34, 95% CI 1.04 to 1.73, respectively). The latter association was unaltered when frequent dyspareunia was considered (supplemental table 11).

**Table 3: Sexual problems by degree of perineal tear.**

|                                                 | No tear/first degree | Second degree    | Episiotomy       | Anal sp          |
|-------------------------------------------------|----------------------|------------------|------------------|------------------|
| <b>One or more sexual problem(s), n=27 992</b>  |                      |                  |                  |                  |
| Cases (%)                                       | 5 882 (37)           | 1 560 (38)       | 2 278 (36)       | 716 (38)         |
| Crude OR (95% CI)                               | Reference            | 1.04 (0.97–1.12) | 0.95 (0.90–1.01) | 1.03 (0.95–1.11) |
| Adjusted OR* (95% CI)                           | Reference            | 1.03 (0.96–1.11) | 0.95 (0.90–1.01) | 1.02 (0.95–1.10) |
| <b>Reduced sexual desire, n=28 586</b>          |                      |                  |                  |                  |
| Cases (%)                                       | 3 523 (22)           | 935 (22)         | 1 342 (21)       | 423 (22)         |
| Crude OR (95% CI)                               | Reference            | 1.02 (0.94–1.11) | 0.94 (0.87–1.00) | 1.01 (0.93–1.10) |
| Adjusted OR* (95% CI)                           | Reference            | 1.01 (0.93–1.10) | 0.95 (0.88–1.01) | 1.00 (0.93–1.09) |
| <b>Difficulty in obtaining orgasm, n=28 217</b> |                      |                  |                  |                  |
| Cases (%)                                       | 2 006 (13)           | 553 (14)         | 817 (13)         | 261 (14)         |
| Crude OR (95% CI)                               | Reference            | 1.08 (0.97–1.19) | 1.02 (0.93–1.11) | 1.11 (0.95–1.29) |
| Adjusted OR* (95% CI)                           | Reference            | 1.07 (0.96–1.18) | 1.01 (0.93–1.11) | 1.09 (0.95–1.24) |
| <b>Insufficient lubrication, n=28 308</b>       |                      |                  |                  |                  |
| Cases (%)                                       | 1 133 (7)            | 314 (8)          | 481 (8)          | 163 (9)          |

|    |                                    |           |                  |                  |                  |
|----|------------------------------------|-----------|------------------|------------------|------------------|
| 1  |                                    |           |                  |                  |                  |
| 2  | Crude OR (95% CI)                  | Reference | 1.08 (0.95–1.23) | 1.06 (0.95–1.19) | 1.22 (1.05–1.41) |
| 3  | Adjusted OR* (95% CI)              | Reference | 1.09 (0.96–1.25) | 1.02 (0.91–1.14) | 1.20 (1.05–1.37) |
| 4  |                                    |           |                  |                  |                  |
| 5  | <b>Dyspareunia, n=28 398</b>       |           |                  |                  |                  |
| 6  | Cases (%)                          | 1 469 (9) | 372 (9)          | 562 (9)          | 184 (10)         |
| 7  | Crude OR (95% CI)                  | Reference | 0.98 (0.87–1.10) | 0.95 (0.86–1.05) | 1.05 (0.95–1.16) |
| 8  | Adjusted OR* (95% CI)              | Reference | 0.97 (0.86–1.10) | 0.96 (0.87–1.07) | 1.07 (0.97–1.18) |
| 9  |                                    |           |                  |                  |                  |
| 10 | <b>Entry dyspareunia, n=28 006</b> |           |                  |                  |                  |
| 11 | Cases (%)                          | 453 (3)   | 115 (3)          | 201 (3)          | 74 (4)           |
| 12 | Crude OR (95% CI)                  | Reference | 0.98 (0.80–1.21) | 1.11 (0.94–1.31) | 1.38 (1.17–1.61) |
| 13 | Adjusted OR* (95% CI)              | Reference | 0.98 (0.79–1.20) | 1.09 (0.92–1.30) | 1.34 (1.14–1.57) |
| 14 |                                    |           |                  |                  |                  |
| 15 | <b>Deep dyspareunia, n=28 006</b>  |           |                  |                  |                  |
| 16 | Cases (%)                          | 1 035 (7) | 265 (7)          | 355 (6)          | 117 (6)          |
| 17 | Crude OR (95% CI)                  | Reference | 0.99 (0.86–1.14) | 0.85 (0.75–0.96) | 0.94 (0.84–1.05) |
| 18 | Adjusted OR* (95% CI)              | Reference | 0.98 (0.85–1.13) | 0.87 (0.77–0.99) | 0.97 (0.87–1.08) |
| 19 |                                    |           |                  |                  |                  |
| 20 |                                    |           |                  |                  |                  |
| 21 |                                    |           |                  |                  |                  |

\*Adjusted for maternal age at first birth, calendar year at first birth, pre-pregnant body mass index, socio-occupational status, self-assessed health, disease, exercise in pregnancy, and smoking in pregnancy.  
CI: Confidence interval; OR: Odds ratio.

In sensitivity analyses, adjusting for parity and year at last birth did not change the results (data not shown), and restricting the population to women who had their first birth in the Danish National Birth Cohort only changed the results marginally (supplemental tables 6 and 7). Vaginismus was rare in this study population (1%), but more prevalent in women who had a history of caesarean section. However, results were not substantially altered when we excluded women with vaginismus (supplemental table 9).

## DISCUSSION

In this large sample of Danish mothers, a history of caesarean section was associated with an increased risk of sexual problems in midlife compared with women who had only birthed vaginally. The estimated effect sizes were small to moderate, but if causative would be clinically important. For example, women who had only given birth by caesarean section had a relative risk of 1.11 of sexual problems in later life. This 11 percent proportional increase amounts to a five percent absolute increase from 37 to 42 percent. In contrast, instrumental vaginal birth was not associated with long-term sexual problems. Among women who had delivered by caesarean but had a subsequent spontaneous vaginal

1  
2 birth, the risk of long-term sexual problems was similar to those who had only birthed vaginally. Less  
3 deep dyspareunia was reported by women with episiotomies.  
4  
5

6  
7 Strengths of this study include study size, and long-term follow-up with linkage to registry data,  
8 allowing a detailed investigation of exposures while limiting the risk of differential misclassification.  
9 Limitations include the 47% non-participation. A recent study found that participants in the maternal  
10 follow-up were older, and of higher socio-occupational status and healthier lifestyle than non-  
11 participants, but also that selected exposure-outcome associations were not substantially affected by  
12 selection bias.<sup>16</sup> However, the relatively high socio-occupational level of participants could affect  
13 generalisability. Residual confounding, including confounding by time varying factors and  
14 confounding by indication, should be considered. A study found lower prevalence of vaginal births in  
15 women with vaginismus.<sup>24</sup> It is possible that some of the biopsychological mechanisms that cause  
16 sexual problems may also alter the likelihood of vaginal birth. Among these mechanisms could be  
17 mental illness, which we adjusted for in our analysis, but also vaginismus prior to childbirth, for which  
18 we did not have information. This could draw the results towards an association between caesarean  
19 section and more sexual problems. However, caesarean section on maternal request was rare in  
20 Denmark in the 1990s and 2000s – less than 2% of all births.<sup>25</sup> Results were unchanged when we only  
21 considered women who had their first birth in the Danish National Birth Cohort.  
22  
23  
24  
25  
26  
27  
28  
29  
30  
31  
32  
33

34  
35 The prevalence of sexual problems in midlife in the present study is broadly within the range from  
36 previous reports. In this study, as in previous studies,<sup>10,12</sup> episiotomies were not associated with more  
37 sexual problems. Rather, women with episiotomies reported less deep dyspareunia than women with no  
38 tears or first degree tears. Shorter second stages of labour are observed when episiotomy is used,<sup>5</sup>  
39 which might explain why these women have less deep dyspareunia. However, at present our results do  
40 not justify a change in the advice on avoiding routine use of episiotomy.<sup>26</sup> Some previous studies found  
41 no association between anal sphincter tears and long-term sexual problems,<sup>9,12</sup> whereas others found  
42 increased risk of dyspareunia<sup>11</sup> or reduced lubrication<sup>10</sup> as we did. Scar tissue and a higher prevalence  
43 of incontinence might explain this finding, but the underlying reasons for the tear could also play a  
44 role.  
45  
46  
47  
48  
49  
50  
51  
52  
53  
54  
55  
56  
57  
58  
59  
60

1  
2 Previous studies of long-term sexual health between different modes of birth were small.<sup>10,12</sup> The  
3 studies were carried out in the USA and in Switzerland, countries with different obstetric traditions  
4 from Denmark, and neither found indication that caesarean section protected against sexual problems in  
5 the long term.<sup>10,12</sup> There are a number of possible explanations for the association between caesarean  
6 sections and sexual problems identified in this study. Abdominal adhesions after caesarean section are  
7 not likely to be the whole explanation, since this would not explain why women who had delivered by  
8 caesarean section also reported more entry dyspareunia, nor why vaginal birth after caesarean section  
9 reduces sexual problems. It is possible that expectation of deep dyspareunia can reduce lubrication and  
10 heighten the risk of entry dyspareunia. The simplest explanation is that the achievement of at least one  
11 vaginal birth is protective against sexual problems in later life. This might be a physical effect if,  
12 contrary to anecdote, changes to the perineum after vaginal birth are in some way associated with less  
13 pain or greater pleasure. There may also be psychosexual benefits from achieving a vaginal birth.  
14  
15  
16  
17  
18  
19  
20  
21  
22  
23

24 Caesarean section has been proposed as preventive of pelvic floor dysfunctions, such as pelvic organ  
25 prolapse, and urinary and anal incontinence. Caesarean section appears to protect against pelvic organ  
26 prolapse in both the short and long term.<sup>8</sup> For urinary incontinence, there appears to be a protective  
27 effect of caesarean section in the short term. However, as women age, this potential effect is no longer  
28 found.<sup>8</sup> The current evidence does not support any protective effect of caesarean section on anal  
29 incontinence outside the immediate post-partum period.<sup>8</sup> These factors should all be taken into account,  
30 along with sexual health, when counselling a woman about the choice of mode of birth.  
31  
32  
33  
34  
35  
36  
37

38 Our findings do not support choosing caesarean section over vaginal birth in order to prevent long-term  
39 sexual problems. Instead, vaginal birth appears to be associated with fewer sexual problems, even when  
40 it involves instrumental birth, or an episiotomy.  
41  
42  
43  
44

#### 45 **CONTRIBUTOR AND GUARANTOR INFORMATION**

46 All authors contributed to the design of the study. JO and EAN were responsible for the data collection.  
47 SH analysed the data with help from HK. SH, HK, EAN, JGT, and JO interpreted the results. SH wrote  
48 the first draft of the manuscript, and EAN, HK, JGT, and JO critically revised it. All authors approved  
49 the final manuscript. All authors are guarantors.  
50  
51  
52  
53  
54  
55  
56  
57  
58  
59  
60



## LICENCE FOR PUBLICATION

The Corresponding Author has the right to grant on behalf of all authors and does grant on behalf of all authors, a worldwide licence to the Publishers and its licensees in perpetuity, in all forms, formats and media (whether known now or created in the future), to i) publish, reproduce, distribute, display and store the Contribution, ii) translate the Contribution into other languages, create adaptations, reprints, include within collections and create summaries, extracts and/or, abstracts of the Contribution, iii) create any other derivative work(s) based on the Contribution, iv) to exploit all subsidiary rights in the Contribution, v) the inclusion of electronic links from the Contribution to third party material wherever it may be located; and, vi) licence any third party to do any or all of the above.

## DATA SHARING

The data that support the findings of this study are available from the Danish National Birth Cohort but restrictions apply to the availability of these data, which were used under license for the current study, and so are not publicly available. Data are however available from the authors upon reasonable request and with permission from the Danish National Birth Cohort and the Danish Data Protection Agency.

## TRANSPARENCY

The authors affirm that this manuscript is an honest, accurate, and transparent account of the study being reported; that no important aspects of the study have been omitted; and that any discrepancies from the study as planned (and, if relevant, registered) have been explained.

## COMPETING INTERESTS

All authors have completed the ICMJE uniform disclosure form at [www.icmje.org/coi\\_disclosure.pdf](http://www.icmje.org/coi_disclosure.pdf) and declare: no support from any organization for the submitted work; no financial relationships with any organizations that might have an interest in the submitted work in the previous three years; no other relationships or activities that could appear to have influenced the submitted work.

## ROLE OF FUNDING SOURCE

The Danish National Birth Cohort was established with a significant grant from the Danish National Research Foundation. Additional support was obtained from the Danish Regional Committees, the Pharmacy Foundation, the Egmont Foundation, the March of Dimes Birth Defects Foundation, the

1  
2 Health Foundation and other minor grants. The Danish Council for Independent Research supported the  
3 maternal follow-up.  
4

5  
6  
7 The funders of the Danish National Birth Cohort and the maternal follow-up had no role in study  
8 design, data collection, data analysis, data interpretation, or writing of the report. SH and HK had full  
9 access to all the data in the study, and all authors had final responsibility for the decision to submit for  
10 publication.  
11  
12  
13

## 14 15 16 **ACKNOWLEDGEMENTS**

17 The authors would like to thank all women who participated in the maternal follow-up.  
18  
19  
20

## 21 22 **REFERENCES**

- 23 1 WHO. WHO | Reproductive health [Internet]. WHO. 2017 [cited 2017 Sep 10]. Available from:  
24 [http://www.who.int/topics/reproductive\\_health/en/](http://www.who.int/topics/reproductive_health/en/)  
25  
26
- 27 2 Flynn KE, Lin L, Bruner DW, Cyranowski JM, Hahn EA, Jeffery DD, et al. Sexual Satisfaction  
28 and the Importance of Sexual Health to Quality of Life Throughout the Life Course of U.S.  
29 Adults. *J Sex Med*. 2016;13(11):1642–50.  
30  
31  
32
- 33 3 Srivastava R, Thakar R, Sultan A. Female Sexual Dysfunction in Obstetrics and Gynecology.  
34 *Obstet Gynecol Surv*. 2008;63(8):527–37.  
35  
36  
37
- 38 4 Hicks TL, Goodall SF, Quattrone EM, Lydon-Rochelle MT. Postpartum sexual functioning and  
39 method of delivery: summary of the evidence. *J Midwifery Womens Health*. 2004;49(5):430–  
40 36.  
41  
42  
43
- 44 5 Ejegård H, Ryding EL, Sjogren B. Sexuality after delivery with episiotomy: a long-term follow-  
45 up. *Gynecol Obstet Invest*. 2008;66(1):1–7.  
46  
47  
48
- 49 6 McDonald EA, Gartland D, Small R, Brown SJ. Dyspareunia and childbirth: a prospective  
50 cohort study. *BJOG Int J Obstet Gynaecol*. 2015;122(5):672–79.  
51  
52  
53
- 54 7 Hannah ME, Whyte H, Hannah WJ, Hewson S, Amankwah K, Cheng M, et al. Maternal  
55 outcomes at 2 years after planned cesarean section versus planned vaginal birth for breech  
56  
57  
58

- 1  
2 presentation at term: The international randomized Term Breech Trial. *Am J Obstet Gynecol.*  
3 2004;191(3):917–27.  
4  
5  
6 8 Sandall J, Tribe RM, Avery L, Mola G, Visser GH, Homer CS, et al. Short-term and long-term  
7 effects of caesarean section on the health of women and children. *Lancet.*  
8 2018;392(10155):1349–57.  
9  
10  
11 9 Fornell EU, Matthiesen L, Sjødahl R, Berg G. Obstetric anal sphincter injury ten years after:  
12 subjective and objective long term effects. *BJOG Int J Obstet Gynaecol.* 2005;112(3):312–16.  
13  
14  
15 10 Otero M, Boulvain M, Bianchi-Demicheli F, Floris LA, Sangalli MR, Weil A, et al. Women’s  
16 health 18 years after rupture of the anal sphincter during childbirth: II. Urinary incontinence,  
17 sexual function, and physical and mental health. *Am J Obstet Gynecol.* 2006;194(5):1260–65.  
18  
19  
20 11 Mous M, Muller SA, de Leeuw JW. Long-term effects of anal sphincter rupture during vaginal  
21 delivery: faecal incontinence and sexual complaints. *BJOG Int J Obstet Gynaecol.* 2008;  
22 115(2):234–38.  
23  
24  
25  
26  
27 12 Fehniger JE, Brown JS, Creasman JM, Van Den Eeden SK, Thom DH, Subak LL, et al.  
28 Childbirth and female sexual function later in life. *Obstet Gynecol.* 2013;122(5):988–97.  
29  
30  
31 13 Olsen J, Melbye M, Olsen SF, Sørensen TI, Aaby P, Andersen AM, et al. The Danish National  
32 Birth Cohort--its background, structure and aim. *Scand J Public Health.* 200;29(4):300–07.  
33  
34  
35 14 Statens Serum Institut. About the DNBC - Statens Serum Institut [Internet]. 2015 [cited 2017  
36 Mar 3]. Available from: [http://www.ssi.dk/English/RandD/Research](http://www.ssi.dk/English/RandD/Research%20areas/Epidemiology/DNBC/About%20the%20DNBC.aspx)  
37 [%20areas/Epidemiology/DNBC/About%20the%20DNBC.aspx](http://www.ssi.dk/English/RandD/Research%20areas/Epidemiology/DNBC/About%20the%20DNBC.aspx)  
38  
39  
40 15 Nohr EA, Frydenberg M, Henriksen TB, Olsen J. Does Low Participation in Cohort Studies  
41 Induce Bias? *Epidemiology.* 2006;17(4):413–18.  
42  
43  
44 16 Bliddal M, Liew Z, Pottegård A, Kirkegaard H, Olsen J, Nohr EA. Examining Non-  
45 Participation to the Maternal Follow-up Within the Danish National Birth Cohort. *Am J*  
46 *Epidemiol.* 2018 Jan 16.  
47  
48  
49 17 Ministeriet for Sundhed og Forebyggelse. Lov om videnskabetisk behandling af  
50 sundhedsvidenskabelige forskningsprojekter [Internet]. LOV nr 593 Jun 14, 2011 [cited 2017  
51 Jan 3]. Available from: <https://www.retsinformation.dk/Forms/R0710.aspx?id=137674>  
52  
53  
54  
55  
56  
57  
58  
59  
60

- 1  
2 18 Christensen AI, Jensen HAR, Ekholm O, Davidsen M, Juel K. Seksuel sundhed. Resultater fra  
3 Sundheds- og sygelighedsundersøgelsen 2013. Denmark: *Statens Institut for Folkesundhed,*  
4 *SDU*; 2016.  
5  
6  
7 19 Knudsen LB, Olsen J. The Danish Medical Birth Registry. *Dan Med Bull.* 1998;45(3):320–23.  
8  
9  
10 20 Thygesen LC, Daasnes C, Thaulow I, Brønnum-Hansen H. Introduction to Danish (nationwide)  
11 registers on health and social issues: Structure, access, legislation, and archiving. *Scand J*  
12 *Public Health.* 2011;39(7\_suppl):12–16.  
13  
14  
15 21 Glymour MM, Greenland S. Causal Diagrams. In: Modern epidemiology. Third edition.  
16 Philadelphia Baltimore New York London Buenos Aires Hong Kong Sydney Tokyo: *Wolters*  
17 *Kluwer Health, Lippincott Williams & Wilkins*; 2008. p. 183–209.  
18  
19  
20 22 Nohr EA, Bech BH, Davies MJ, Frydenberg M, Henriksen TB, Olsen J. Prepregnancy Obesity  
21 and Fetal Death: A Study Within the Danish National Birth Cohort. *Obstet Gynecol.* 2005;  
22 106(2):250–59.  
23  
24  
25 23 Sterne JAC, White IR, Carlin JB, Spratt M, Royston P, Kenward MG, et al. Multiple imputation  
26 for missing data in epidemiological and clinical research: potential and pitfalls. *BMJ.* 2009;  
27 338:b2393.  
28  
29  
30 24 Möller L, Josefsson A, Bladh M, Lilliecreutz C, Sydsjö G. Reproduction and mode of delivery  
31 in women with vaginismus or localised provoked vestibulodynia: a Swedish register-based  
32 study. *BJOG Int J Obstet Gynaecol.* 2015;122(3):329–34.  
33  
34  
35 25 Forsthalm MM, Lidegaard O. [Cesarean section on maternal request]. *Ugeskr Laeger.* 2009;  
36 171(7):497–502.  
37  
38  
39 26 Jiang H, Qian X, Carroli G, Garner P. Selective versus routine use of episiotomy for vaginal  
40 birth. In: The Cochrane Collaboration, editor. Cochrane Database of Systematic Reviews  
41 [Internet]. Chichester, UK: *John Wiley & Sons, Ltd*; 2017 [cited 2017 Apr 27]. Available from:  
42 <http://doi.wiley.com/10.1002/14651858.CD000081.pub3>  
43  
44  
45  
46  
47  
48  
49  
50  
51  
52  
53  
54  
55  
56  
57  
58  
59  
60

1  
2  
3  
4  
5  
6  
7  
8  
9  
10  
11  
12  
13  
14  
15  
16  
17  
18  
19  
20  
21  
22  
23  
24  
25  
26  
27  
28  
29  
30  
31  
32  
33  
34  
35  
36  
37  
38  
39  
40  
41  
42  
43  
44  
45  
46  
47  
48  
49  
50  
51  
52  
53  
54  
55  
56  
57  
58  
59  
60

**FIGURE LEGEND**

Figure 1: Flow chart of the study population.

For peer review only

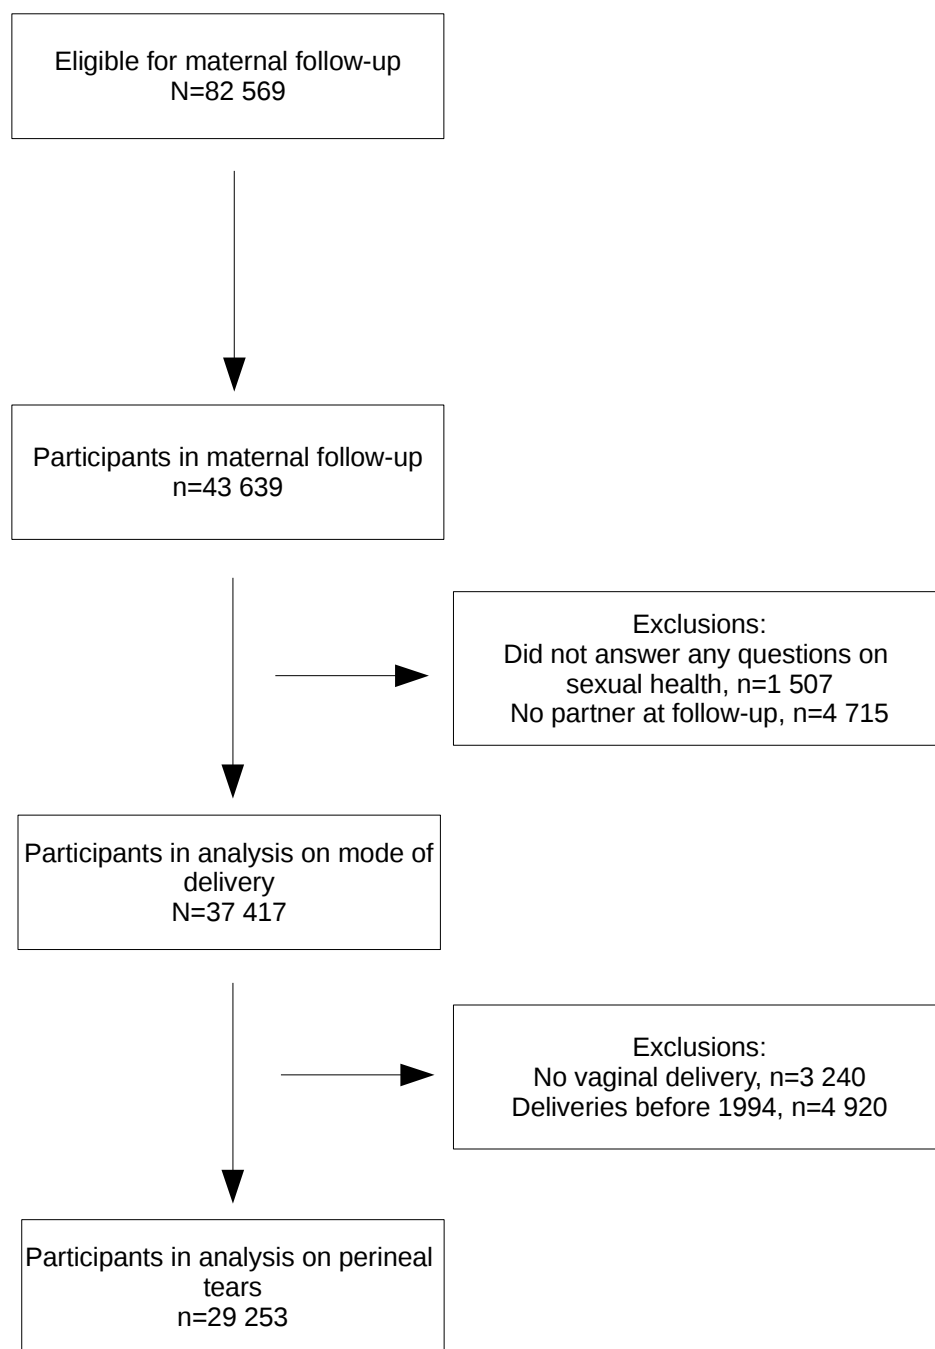

## Mode of birth and long term sexual health – follow-up of the Danish National Birth Cohort

Sarah Hjorth, Helene Kirkegaard, Jørn Olsen, Jim G Thornton, Ellen A Nohr

### Supplemental material

The supplementary material contains:

Supplemental table 1: Sexual health in the past year (2012-2013) in mothers in their mid-forties (N=37 147).

Supplemental table 2: Sexual problems by degree of perineal tear, 3<sup>rd</sup> and 4<sup>th</sup> degree tears analysed separately.

Supplemental table 3: Sexual problems by mode of birth in participants with complete data.

Supplemental table 4: Sexual problems by degree of perineal tear in participants with complete data.

Supplemental table 5: Exposures in participants and non-participants.

Supplemental table 6: Sexual problems by mode of birth in women who had their first birth in the DNBC.

Supplemental table 7: Sexual problems by degree of perineal tear in women who had their first birth in the DNBC.

Supplemental table 8: Frequent dyspareunia by mode of birth.

Supplemental table 9: Sexual problems by mode of birth in participants without vaginismus.

Supplemental table 10: Participant characteristics by degree of perineal tear.

Supplemental table 11: Frequent dyspareunia by degree of perineal tear.

Supplemental figure 1: Directed acyclic graph.

**Supplemental table 1: Sexual health in the past year (2012-2013) in mothers in their mid-forties (N=37 147).**

|                                                                                       | n (%)*      |
|---------------------------------------------------------------------------------------|-------------|
| <b>Have your sexual needs been met?</b>                                               |             |
| Completely                                                                            | 15 081 (41) |
| Almost completely                                                                     | 10 208 (29) |
| Partially                                                                             | 6 666 (18)  |
| A little                                                                              | 2 248 (6)   |
| Not at all                                                                            | 1 090 (3)   |
| I have not had sexual needs                                                           | 1 108 (3)   |
| I do not know                                                                         | 290 (1)     |
| <b>How often have you been sexually active with another person?</b>                   |             |
| Every day                                                                             | 89 (0.2)    |
| 3–6 times a week                                                                      | 3 432 (9)   |
| 1–2 times a week                                                                      | 13 640 (37) |
| 1–3 times a month                                                                     | 12 671 (35) |
| Less than once a month                                                                | 4 960 (14)  |
| Not at all                                                                            | 1 327 (4)   |
| I do not know                                                                         | 348 (1)     |
| <b>Have you experienced lacking or reduced sexual desire?</b>                         |             |
| Yes, all the time                                                                     | 1 551 (4)   |
| Yes, often                                                                            | 7 551 (21)  |
| Yes, sometimes                                                                        | 13 566 (37) |
| Yes, but rarely                                                                       | 9 084 (25)  |
| No, never                                                                             | 4 612 (13)  |
| I do not know                                                                         | 376 (1.)    |
| <b><i>If yes, was it a problem for you?</i></b>                                       |             |
| Yes                                                                                   | 7 945 (35)  |
| No                                                                                    | 12 220 (55) |
| I do not know                                                                         | 2 275 (10)  |
| <b><i>Was it a problem for your partner?</i></b>                                      |             |
| Yes                                                                                   | 12 752 (61) |
| No                                                                                    | 4 465 (21)  |
| I do not know                                                                         | 3 740 (18)  |
| <b>Have you experienced the following during sexual activity with another person?</b> |             |



**Supplemental table 1: Sexual health in the past year (2012-2013) in mothers in their mid-forties (N=37 147) (continued).**

|                                                                       | n (%)*      |
|-----------------------------------------------------------------------|-------------|
| <b>I have not been sufficiently wet in the vagina</b>                 |             |
| Not at all                                                            | 18 242 (51) |
| Rarely                                                                | 8 272 (23)  |
| Sometimes                                                             | 5 938 (16)  |
| Often                                                                 | 2 024 (6)   |
| Every time                                                            | 885 (2)     |
| I do not know                                                         | 787 (2)     |
| <b>I have not, or only with great difficulty, achieved orgasm</b>     |             |
| Not at all                                                            | 13 119 (36) |
| Rarely                                                                | 10 580 (29) |
| Sometimes                                                             | 6 853 (19)  |
| Often                                                                 | 2 943 (8)   |
| Every time                                                            | 1 707 (5)   |
| I do not know                                                         | 817 (2)     |
| <b>I have had vaginismus that prevented intercourse</b>               |             |
| Not at all                                                            | 34 601 (95) |
| Rarely                                                                | 638 (2)     |
| Sometimes                                                             | 269 (1)     |
| Often                                                                 | 87 (0.2)    |
| Every time                                                            | 16 (<0.1)   |
| I do not know                                                         | 647 (2)     |
| <b>I have had pain in my genitals and/or abdomen with intercourse</b> |             |
| Not at all                                                            | 26 965 (74) |
| Rarely                                                                | 5 256 (14)  |
| Sometimes                                                             | 2 704 (7)   |
| Often                                                                 | 584 (2)     |
| Every time                                                            | 211 (1)     |
| I do not know                                                         | 546 (2)     |
| <b>If yes, where was the pain located?†</b>                           |             |
| At the vaginal entrance                                               | 1 253 (36)  |
| Deep in the abdomen                                                   | 2 277 (65)  |
| I do not know                                                         | 228 (7)     |

\*Percentage of those who have answered the question. The number of answers available for analysis for each outcome differed, as the response option 'I do not wish to answer this question' was provided for questions on sexual health and varied for all questions between 210

1  
2 and 1361. The number of missing values were between 0 and 37 for all questions except 'was it a problem for your partner?' with 1503  
3 missing values.

4 †More than one answer could be given, wherefore the percentage adds up to more than 100.  
5  
6  
7  
8  
9  
10  
11  
12  
13  
14  
15  
16  
17  
18  
19  
20  
21  
22  
23  
24  
25  
26  
27  
28  
29  
30  
31  
32  
33  
34  
35  
36  
37  
38  
39  
40  
41  
42  
43  
44  
45  
46  
47  
48  
49  
50  
51  
52  
53  
54  
55  
56  
57  
58  
59  
60

For peer review only

**Supplemental table 2: Sexual problems by degree of perineal tear, 3<sup>rd</sup> and 4<sup>th</sup> degree tears analysed separately.**

|                                                 | No tear/first degree | Second degree    | Episiotomy       | Third degree     | Fourth degree    |
|-------------------------------------------------|----------------------|------------------|------------------|------------------|------------------|
| <b>One or more sexual problem(s), n=27 992</b>  |                      |                  |                  |                  |                  |
| Cases (%)                                       | 5 882 (37)           | 1 560 (38)       | 2 278 (36)       | 617 (38)         | 99 (42)          |
| Crude OR (95% CI)                               | Reference            | 1.04 (0.97–1.12) | 0.95 (0.90–1.01) | 1.01 (0.91–1.12) | 1.19 (0.92–1.55) |
| Adjusted OR* (95% CI)                           | Reference            | 1.03 (0.96–1.11) | 0.95 (0.90–1.01) | 1.00 (0.90–1.11) | 1.17 (0.90–1.52) |
| <b>Reduced sexual desire, n=28 586</b>          |                      |                  |                  |                  |                  |
| Cases (%)                                       | 3 523 (22)           | 935 (22)         | 1 342 (21)       | 369 (22)         | 54 (22)          |
| Crude OR (95% CI)                               | Reference            | 1.02 (0.94–1.11) | 0.94 (0.87–1.00) | 1.01 (0.89–1.14) | 1.00 (0.74–1.36) |
| Adjusted OR* (95% CI)                           | Reference            | 1.01 (0.93–1.10) | 0.95 (0.88–1.01) | 1.00 (0.88–1.13) | 0.99 (0.73–1.34) |
| <b>Difficulty in obtaining orgasm, n=28 217</b> |                      |                  |                  |                  |                  |
| Cases (%)                                       | 2 006 (13)           | 553 (13)         | 817 (13)         | 232 (14)         | 29 (12)          |
| Crude OR (95% CI)                               | Reference            | 1.08 (0.97–1.19) | 1.02 (0.93–1.11) | 1.13 (0.98–1.31) | 0.94 (0.64–1.39) |
| Adjusted OR* (95% CI)                           | Reference            | 1.07 (0.96–1.18) | 1.01 (0.93–1.11) | 1.12 (0.96–1.29) | 0.92 (0.62–1.36) |
| <b>Insufficient lubrication, n=28 308</b>       |                      |                  |                  |                  |                  |
| Cases (%)                                       | 1 133 (7)            | 314 (8)          | 481 (8)          | 139 (8)          | 24 (10)          |
| Crude OR (95% CI)                               | Reference            | 1.08 (0.95–1.23) | 1.06 (0.95–1.19) | 1.19 (0.99–1.43) | 1.43 (0.93–2.19) |
| Adjusted OR* (95% CI)                           | Reference            | 1.09 (0.96–1.25) | 1.02 (0.91–1.14) | 1.17 (0.97–1.41) | 1.42 (0.93–1.19) |
| <b>Dyspareunia, n=28 398</b>                    |                      |                  |                  |                  |                  |
| Cases (%)                                       | 1 469 (9)            | 372 (9)          | 562 (9)          | 158 (10)         | 26 (11)          |
| Crude OR (95% CI)                               | Reference            | 0.98 (0.87–1.10) | 0.95 (0.86–1.05) | 1.04 (0.87–1.23) | 1.18 (0.78–1.77) |
| Adjusted OR* (95% CI)                           | Reference            | 0.97 (0.86–1.10) | 0.96 (0.87–1.07) | 1.05 (0.88–1.25) | 1.17 (0.77–1.77) |
| <b>Entry dyspareunia, n=28 006</b>              |                      |                  |                  |                  |                  |
| Cases (%)                                       | 453 (3)              | 115 (3)          | 201 (3)          | 62 (4)           | 12 (5)           |
| Crude OR (95% CI)                               | Reference            | 0.98 (0.80–1.21) | 1.11 (0.94–1.31) | 1.33 (1.01–1.74) | 1.77 (0.98–3.19) |
| Adjusted OR* (95% CI)                           | Reference            | 0.98 (0.79–1.20) | 1.09 (0.92–1.30) | 1.29 (0.98–1.69) | 1.74 (0.97–3.15) |
| <b>Deep dyspareunia, n=28 006</b>               |                      |                  |                  |                  |                  |
| Cases (%)                                       | 1 035 (7)            | 265 (7)          | 355 (6)          | 103 (6)          | 14 (6)           |
| Crude OR (95% CI)                               | Reference            | 0.99 (0.86–1.14) | 0.85 (0.75–0.96) | 0.95 (0.77–1.18) | 0.88 (0.51–1.51) |
| Adjusted OR* (95% CI)                           | Reference            | 0.98 (0.85–1.13) | 0.87 (0.77–0.99) | 0.99 (0.80–1.22) | 0.88 (0.51–1.51) |

\*Adjusted for maternal age at first birth, calendar year at first birth, pre-pregnant body mass index, socio-occupational status, self-assessed health, disease, exercise in pregnancy, and smoking in pregnancy.

CI: Confidence interval; OR: Odds ratio.

**Supplemental table 3: Sexual problems by mode of birth in participants with complete data.**

|                                                 | Only spontaneous births | Instrumental vaginal birth, ever | Only c-sections  | Spontaneous VBAC | Instrumental VBAC | C-section after vaginal birth |
|-------------------------------------------------|-------------------------|----------------------------------|------------------|------------------|-------------------|-------------------------------|
| <b>One or more sexual problem(s), n=32 638</b>  |                         |                                  |                  |                  |                   |                               |
| Cases (%)                                       | 7 615 (37)              | 1 643 (38)                       | 1 144 (42)       | 651 (37)         | 177 (44)          | 1 043 (39)                    |
| Crude OR (95% CI)                               | Reference               | 1.03 (0.96–1.10)                 | 1.21 (1.12–1.32) | 1.00 (0.90–1.10) | 1.34 (1.10–1.64)  | 1.10 (1.01–1.20)              |
| Adjusted OR* (95% CI)                           | Reference               | 1.02 (0.95–1.09)                 | 1.16 (1.07–1.26) | 1.00 (0.90–1.10) | 1.34 (1.10–1.64)  | 1.09 (1.00–1.18)              |
| <b>Reduced desire, n=33 360</b>                 |                         |                                  |                  |                  |                   |                               |
| Cases (%)                                       | 4 547 (22)              | 956 (21)                         | 644 (23)         | 395 (22)         | 100 (24)          | 602 (22)                      |
| Crude OR (95% CI)                               | Reference               | 0.99 (0.92–1.07)                 | 1.07 (0.97–1.17) | 1.02 (0.91–1.14) | 1.17 (0.93–1.47)  | 1.03 (0.94–1.14)              |
| Adjusted OR* (95% CI)                           | Reference               | 0.99 (0.92–1.07)                 | 1.03 (0.94–1.13) | 1.02 (0.91–1.14) | 1.17 (0.93–1.47)  | 1.02 (0.93–1.13)              |
| <b>Difficulty in obtaining orgasm, n=32 915</b> |                         |                                  |                  |                  |                   |                               |
| Cases (%)                                       | 2 621 (13)              | 590 (13)                         | 377 (14)         | 233 (13)         | 69 (17)           | 361 (13)                      |
| Crude OR (95% CI)                               | Reference               | 1.07 (0.97–1.18)                 | 1.08 (0.96–1.22) | 1.04 (0.90–1.20) | 1.43 (1.10–1.85)  | 1.08 (0.96–1.21)              |
| Adjusted OR* (95% CI)                           | Reference               | 1.06 (0.96–1.16)                 | 1.03 (0.92–1.16) | 1.04 (0.90–1.20) | 1.42 (1.09–1.84)  | 1.07 (0.95–1.21)              |
| <b>Insufficient lubrication, n=33 033</b>       |                         |                                  |                  |                  |                   |                               |
| Cases (%)                                       | 1 551 (7)               | 351 (8)                          | 310 (11)         | 126 (7)          | 39 (10)           | 272 (10)                      |
| Crude OR (95% CI)                               | Reference               | 1.07 (0.95–1.21)                 | 1.55 (1.36–1.76) | 0.94 (0.79–1.13) | 1.31 (0.94–1.83)  | 1.40 (1.22–1.60)              |
| Adjusted OR* (95% CI)                           | Reference               | 1.00 (0.89–1.13)                 | 1.40 (1.23–1.60) | 0.95 (0.79–1.14) | 1.23 (0.88–1.72)  | 1.35 (1.18–1.55)              |
| <b>Dyspareunia, n=33 140</b>                    |                         |                                  |                  |                  |                   |                               |
| Cases (%)                                       | 1 858 (9)               | 407 (9)                          | 417 (15)         | 164 (9)          | 48 (12)           | 282 (10)                      |
| Crude OR (95% CI)                               | Reference               | 1.03 (0.92–1.16)                 | 1.79 (1.60–2.00) | 1.03 (0.87–1.21) | 1.36 (1.00–1.84)  | 1.19 (1.05–1.36)              |
| Adjusted OR* (95% CI)                           | Reference               | 1.05 (0.93–1.17)                 | 1.76 (1.57–1.98) | 1.04 (0.88–1.23) | 1.39 (1.02–1.89)  | 1.16 (1.02–1.33)              |
| <b>Entry dyspareunia, n=32 645</b>              |                         |                                  |                  |                  |                   |                               |
| Cases (%)                                       | 573 (3)                 | 148 (3)                          | 219 (8)          | 67 (4)           | 21 (5)            | 101 (4)                       |
| Crude OR (95% CI)                               | Reference               | 1.23 (1.02–1.48)                 | 3.04 (2.59–3.57) | 1.37 (1.06–1.77) | 1.93 (1.24–3.02)  | 1.38 (1.11–1.71)              |
| Adjusted OR* (95% CI)                           | Reference               | 1.19 (0.99–1.43)                 | 2.81 (2.38–3.32) | 1.37 (1.06–1.77) | 1.89 (1.20–2.95)  | 1.36 (1.09–1.68)              |
| <b>Deep dyspareunia, n=32 645</b>               |                         |                                  |                  |                  |                   |                               |
| Cases (%)                                       | 1 308 (6)               | 253 (6)                          | 206 (8)          | 96 (5)           | 29 (7)            | 182 (7)                       |
| Crude OR (95% CI)                               | Reference               | 0.91 (0.79–1.04)                 | 1.20 (1.03–1.40) | 0.84 (0.68–1.04) | 1.15 (0.79–1.69)  | 1.08 (0.92–1.27)              |
| Adjusted OR* (95% CI)                           | Reference               | 0.94 (0.82–1.09)                 | 1.21 (1.04–1.42) | 0.85 (0.69–1.06) | 1.21 (0.82–1.77)  | 1.05 (0.89–1.24)              |

\*Adjusted for maternal age at first birth, calendar year at first birth, pre-pregnant body mass index, socio-occupational status, self-assessed health, disease, exercise in pregnancy, and smoking in pregnancy.

C-section: Caesarean section; CI: Confidence interval; OR: Odds ratio; VBAC: Vaginal birth after caesarean section.

**Supplemental table 4: Sexual problems by degree of perineal tear in participants with complete data.**

|                                                 | No tear/first degree | Second degree    | Episiotomy       | Anal sphincter tear |
|-------------------------------------------------|----------------------|------------------|------------------|---------------------|
| <b>One or more sexual problem(s), n=25 655</b>  |                      |                  |                  |                     |
| Cases (%)                                       | 5 434 (37)           | 1 430 (38)       | 2 086 (36)       | 644 (37)            |
| Crude OR (95% CI)                               | Reference            | 1.04 (0.96–1.12) | 0.95 (0.89–1.01) | 1.00 (0.90–1.10)    |
| Adjusted OR* (95% CI)                           | Reference            | 1.03 (0.95–1.11) | 0.95 (0.89–1.02) | 0.98 (0.89–1.09)    |
| <b>Reduced sexual desire, n=26 194</b>          |                      |                  |                  |                     |
| Cases (%)                                       | 3 247 (22)           | 859 (23)         | 1 228 (21)       | 382 (22)            |
| Crude OR (95% CI)                               | Reference            | 1.03 (0.94–1.12) | 0.94 (0.87–1.01) | 0.99 (0.88–1.11)    |
| Adjusted OR* (95% CI)                           | Reference            | 1.01 (0.93–1.11) | 0.95 (0.88–1.02) | 0.98 (0.87–1.10)    |
| <b>Difficulty in obtaining orgasm, n=25 861</b> |                      |                  |                  |                     |
| Cases (%)                                       | 1 852 (13)           | 512 (14)         | 749 (13)         | 244 (14)            |
| Crude OR (95% CI)                               | Reference            | 1.09 (0.98–1.21) | 1.02 (0.93–1.12) | 1.13 (0.98–1.30)    |
| Adjusted OR* (95% CI)                           | Reference            | 1.07 (0.96–1.19) | 1.02 (0.93–1.11) | 1.11 (0.96–1.28)    |
| <b>Insufficient lubrication, n=25 945</b>       |                      |                  |                  |                     |
| Cases (%)                                       | 1 051 (7)            | 286 (8)          | 437 (8)          | 146 (8)             |
| Crude OR (95% CI)                               | Reference            | 1.06 (0.93–1.22) | 1.05 (0.93–1.18) | 1.18 (0.99–1.42)    |
| Adjusted OR* (95% CI)                           | Reference            | 1.08 (0.94–1.24) | 1.00 (0.89–1.12) | 1.16 (0.97–1.40)    |
| <b>Dyspareunia, n=26 028</b>                    |                      |                  |                  |                     |
| Cases (%)                                       | 1 348 (9)            | 340 (9)          | 519 (9)          | 160 (9)             |
| Crude OR (95% CI)                               | Reference            | 0.98 (0.86–1.11) | 0.96 (0.87–1.07) | 1.00 (0.84–1.18)    |
| Adjusted OR* (95% CI)                           | Reference            | 0.98 (0.86–1.11) | 0.98 (0.88–1.09) | 1.01 (0.85–1.20)    |
| <b>Entry dyspareunia, n=25 670</b>              |                      |                  |                  |                     |
| Cases (%)                                       | 415 (3)              | 103 (3)          | 187 (3)          | 65 (4)              |
| Crude OR (95% CI)                               | Reference            | 0.97 (0.78–1.20) | 1.14 (0.96–1.36) | 1.33 (1.02–1.74)    |
| Adjusted OR* (95% CI)                           | Reference            | 0.97 (0.78–1.21) | 1.12 (0.94–1.34) | 1.31 (1.00–1.71)    |
| <b>Deep dyspareunia, n=25 670</b>               |                      |                  |                  |                     |
| Cases (%)                                       | 954 (7)              | 245 (7)          | 326 (6)          | 101 (6)             |
| Crude OR (95% CI)                               | Reference            | 1.00 (0.87–1.16) | 0.85 (0.75–0.97) | 0.89 (0.72–1.09)    |
| Adjusted OR* (95% CI)                           | Reference            | 1.00 (0.86–1.15) | 0.88 (0.77–1.00) | 0.91 (0.74–1.13)    |

\*Adjusted for maternal age at first birth, calendar year at first birth, pre-pregnant body mass index, socio-occupational status, self-assessed health, disease, exercise in pregnancy, and smoking in pregnancy.

CI: Confidence interval; OR: Odds ratio.

1  
2 **Supplemental table 5: Exposures in participants and non-participants.**  
3

4

|                                        | The DNBC*   | The maternal follow-up | Participants in<br>This study | One or more sexual<br>problems† |
|----------------------------------------|-------------|------------------------|-------------------------------|---------------------------------|
| <b>Mode of birth, n (%)</b>            |             |                        |                               |                                 |
| All                                    | 88 128      | 43 639                 | 37 417                        | 35 514                          |
| Only spontaneous births                | 54 728 (62) | 27 440 (63)            | 23 608 (63)                   | 22 496 (63)                     |
| Instrumental vaginal birth, ever       | 11 521 (13) | 5 845 (13)             | 5 003 (13)                    | 4 736 (13)                      |
| Only c-sections                        | 8 386 (10)  | 3 895 (9)              | 3 244 (9)                     | 3 014 (9)                       |
| Spontaneous VBAC                       | 4 565 (5)   | 2 355 (5)              | 2 038 (5)                     | 1 931 (5)                       |
| Instrumental VBAC                      | 1 080 (1)   | 526 (1)                | 457 (1)                       | 431 (1)                         |
| C-section after vaginal birth          | 7 848 (9)   | 3 578 (8)              | 3 067 (8)                     | 2 906 (8)                       |
| <b>Degree of perineal tear, n (%)‡</b> |             |                        |                               |                                 |
| All                                    | 67 516      | 33 889                 | 29 253                        | 27 864                          |
| No tear or first degree                | 38 625 (57) | 19 094 (56)            | 16 404 (56)                   | 15 682 (56)                     |
| Second degree                          | 9 590 (14)  | 4 888 (14)             | 4 267 (15)                    | 4 047 (15)                      |
| Episiotomy                             | 15 025 (22) | 7 662 (23)             | 6 615 (22.6)                  | 6 274 (23)                      |
| Anal sphincter tear                    | 4 276 (6)   | 2 245 (7)              | 1 967 (7)                     | 1 861 (7)                       |

15  
16 \*Women with a live- or stillbirth in the DNBC.

17 †The outcome with highest percentage of missing data.

18 ‡Women with a vaginal birth and no birth prior to 1994.

19 C-section: Caesarean section; DNBC: Danish National Birth Cohort; VBAC: Vaginal birth after caesarean section.  
20  
21  
22  
23  
24  
25  
26  
27  
28  
29  
30  
31  
32  
33  
34  
35  
36  
37  
38  
39  
40  
41  
42  
43  
44  
45  
46  
47

**Supplemental table 6: Sexual problems by mode of birth in women who had their first birth in the DNBC.**

|                                                 | Only spontaneous births | Instrumental vaginal birth, ever | Only c-sections  | Spontaneous VBAC | Instrumental VBAC | C-section after vaginal birth |
|-------------------------------------------------|-------------------------|----------------------------------|------------------|------------------|-------------------|-------------------------------|
| <b>One or more sexual problem(s), n=17 587</b>  |                         |                                  |                  |                  |                   |                               |
| Cases (%)                                       | 4 069 (38)              | 920 (39)                         | 865 (41)         | 342 (39)         | 90 (46)           | 517 (40)                      |
| Crude OR (95% CI)                               | Reference               | 1.07 (0.98–1.18)                 | 1.17 (1.06–1.28) | 1.04 (0.90–1.19) | 1.43 (1.08–1.90)  | 1.10 (0.98–1.24)              |
| Adjusted OR* (95% CI)                           | Reference               | 1.07 (0.98–1.18)                 | 1.15 (1.04–1.27) | 1.04 (0.90–1.20) | 1.43 (1.08–1.91)  | 1.09 (0.97–1.23)              |
| <b>Reduced desire, n=17 941</b>                 |                         |                                  |                  |                  |                   |                               |
| Cases (%)                                       | 2 466 (22)              | 541 (23)                         | 500 (23)         | 211 (23)         | 52 (26)           | 295 (22)                      |
| Crude OR (95% CI)                               | Reference               | 1.02 (0.92–1.13)                 | 1.05 (0.94–1.17) | 1.05 (0.90–1.24) | 1.22 (0.89–1.68)  | 1.00 (0.87–1.15)              |
| Adjusted OR* (95% CI)                           | Reference               | 1.02 (0.92–1.14)                 | 1.04 (0.93–1.17) | 1.06 (0.90–1.24) | 1.22 (0.89–1.68)  | 0.98 (0.86–1.13)              |
| <b>Difficulty in obtaining orgasm, n=17 730</b> |                         |                                  |                  |                  |                   |                               |
| Cases (%)                                       | 1 397 (13)              | 332 (14)                         | 285 (13)         | 131 (15)         | 33 (17)           | 176 (14)                      |
| Crude OR (95% CI)                               | Reference               | 1.11 (0.98–1.27)                 | 1.05 (0.92–1.21) | 1.16 (0.96–1.41) | 1.37 (0.94–2.00)  | 1.06 (0.90–1.26)              |
| Adjusted OR* (95% CI)                           | Reference               | 1.11 (0.97–1.26)                 | 1.04 (0.91–1.20) | 1.16 (0.96–1.41) | 1.38 (0.94–2.01)  | 1.06 (0.89–1.25)              |
| <b>Insufficient lubrication, n=17 784</b>       |                         |                                  |                  |                  |                   |                               |
| Cases (%)                                       | 738 (7)                 | 173 (7)                          | 220 (10)         | 55 (6)           | 21 (11)           | 124 (10)                      |
| Crude OR (95% CI)                               | Reference               | 1.09 (0.92–1.29)                 | 1.59 (1.35–1.86) | 0.90 (0.68–1.19) | 1.65 (1.04–2.61)  | 1.44 (1.18–1.76)              |
| Adjusted OR* (95% CI)                           | Reference               | 1.03 (0.87–1.23)                 | 1.38 (1.17–1.62) | 0.91 (0.68–1.20) | 1.64 (1.03–2.60)  | 1.45 (1.19–1.77)              |
| <b>Dyspareunia, n=17 840</b>                    |                         |                                  |                  |                  |                   |                               |
| Cases (%)                                       | 995 (9)                 | 230 (10)                         | 312 (15)         | 82 (9)           | 28 (14)           | 157 (12)                      |
| Crude OR (95% CI)                               | Reference               | 1.07 (0.92–1.25)                 | 1.71 (1.49–1.96) | 1.00 (0.79–1.27) | 1.65 (1.10–2.48)  | 1.35 (1.13–1.62)              |
| Adjusted OR* (95% CI)                           | Reference               | 1.09 (0.93–1.26)                 | 1.69 (1.47–1.94) | 1.00 (0.79–1.27) | 1.68 (1.12–2.53)  | 1.31 (1.09–1.57)              |
| <b>Entry dyspareunia, n=17 573</b>              |                         |                                  |                  |                  |                   |                               |
| Cases (%)                                       | 300 (3)                 | 80 (3)                           | 158 (8)          | 33 (4)           | 11 (6)            | 54 (4)                        |
| Crude OR (95% CI)                               | Reference               | 1.24 (0.97–1.60)                 | 2.87 (2.36–3.51) | 1.35 (0.93–1.94) | 2.09 (1.13–3.88)  | 1.52 (1.13–2.04)              |
| Adjusted OR* (95% CI)                           | Reference               | 1.20 (0.93–1.54)                 | 2.56 (2.08–3.14) | 1.35 (0.93–1.95) | 2.06 (1.11–3.83)  | 1.52 (1.13–2.04)              |
| <b>Deep dyspareunia, n=17 573</b>               |                         |                                  |                  |                  |                   |                               |
| Cases (%)                                       | 721 (7)                 | 151 (6)                          | 160 (8)          | 50 (6)           | 18 (9)            | 182 (8)                       |
| Crude OR (95% CI)                               | Reference               | 0.97 (0.81–1.16)                 | 1.16 (0.97–1.39) | 0.83 (0.62–1.12) | 1.42 (0.87–2.32)  | 1.27 (1.03–1.57)              |
| Adjusted OR* (95% CI)                           | Reference               | 1.00 (0.83–1.20)                 | 1.21 (1.01–1.45) | 0.84 (0.62–1.12) | 1.48 (0.90–2.42)  | 1.21 (0.98–1.50)              |

\*Adjusted for maternal age at first birth, calendar year at first birth, pre-pregnant body mass index, socio-occupational status, self-assessed health, disease, exercise in pregnancy, and smoking in pregnancy.  
 C-section: Caesarean section; CI: Confidence interval; DNBC: Danish National Birth Cohort; OR: Odds ratio; VBAC: Vaginal birth after caesarean section.

**Supplemental table 7: Sexual problems by degree of perineal tear in women who had their first birth in the DNBC.**

|                                                 | No tear/first degree | Second degree    | Episiotomy       | Anal sphincter tear |
|-------------------------------------------------|----------------------|------------------|------------------|---------------------|
| <b>One or more sexual problem(s), n=15 496</b>  |                      |                  |                  |                     |
| Cases (%)                                       | 3 251 (38)           | 1 087 (39)       | 1 120 (37)       | 480 (39)            |
| Crude OR (95% CI)                               | Reference            | 1.03 (0.95–1.13) | 0.94 (0.87–1.03) | 1.01 (0.90–1.14)    |
| Adjusted OR* (95% CI)                           | Reference            | 1.04 (0.95–1.13) | 0.94 (0.86–1.02) | 1.02 (0.90–1.15)    |
| <b>Reduced sexual desire, n=15 794</b>          |                      |                  |                  |                     |
| Cases (%)                                       | 1 971 (23)           | 650 (23)         | 655 (21)         | 289 (23)            |
| Crude OR (95% CI)                               | Reference            | 0.99 (0.90–1.10) | 0.91 (0.82–1.00) | 1.00 (0.87–1.15)    |
| Adjusted OR* (95% CI)                           | Reference            | 1.00 (0.90–1.11) | 0.91 (0.82–1.01) | 1.01 (0.88–1.16)    |
| <b>Difficulty in obtaining orgasm, n=15 610</b> |                      |                  |                  |                     |
| Cases (%)                                       | 1 108 (13)           | 386 (14)         | 402 (13)         | 173 (14)            |
| Crude OR (95% CI)                               | Reference            | 1.07 (0.95–1.22) | 1.01 (0.90–1.15) | 1.08 (0.91–1.28)    |
| Adjusted OR* (95% CI)                           | Reference            | 1.07 (0.95–1.21) | 1.01 (0.89–1.14) | 1.08 (0.91–1.28)    |
| <b>Insufficient lubrication, n=15 656</b>       |                      |                  |                  |                     |
| Cases (%)                                       | 572 (7)              | 208 (7)          | 224 (7)          | 107 (9)             |
| Crude OR (95% CI)                               | Reference            | 1.12 (0.95–1.32) | 1.10 (0.94–1.29) | 1.31 (1.05–1.62)    |
| Adjusted OR* (95% CI)                           | Reference            | 1.11 (0.94–1.31) | 1.07 (0.91–1.25) | 1.27 (1.03–1.58)    |
| <b>Dyspareunia, n=15 705</b>                    |                      |                  |                  |                     |
| Cases (%)                                       | 834 (10)             | 261 (9)          | 269 (9)          | 128 (10)            |
| Crude OR (95% CI)                               | Reference            | 0.94 (0.82–1.09) | 0.89 (0.77–1.03) | 1.05 (0.87–1.28)    |
| Adjusted OR* (95% CI)                           | Reference            | 0.95 (0.82–1.10) | 0.89 (0.77–1.03) | 1.08 (0.89–1.32)    |
| <b>Entry dyspareunia, n=15 494</b>              |                      |                  |                  |                     |
| Cases (%)                                       | 247 (3)              | 78 (3)           | 102 (3)          | 51 (4)              |
| Crude OR (95% CI)                               | Reference            | 0.96 (0.74–1.24) | 1.16 (0.92–1.46) | 1.43 (1.04–1.94)    |
| Adjusted OR* (95% CI)                           | Reference            | 0.95 (0.73–1.23) | 1.13 (0.90–1.43) | 1.41 (1.03–1.92)    |
| <b>Deep dyspareunia, n=15 494</b>               |                      |                  |                  |                     |
| Cases (%)                                       | 603 (7)              | 191 (7)          | 172 (6)          | 82 (7)              |
| Crude OR (95% CI)                               | Reference            | 0.96 (0.81–1.14) | 0.78 (0.66–0.93) | 0.92 (0.73–1.17)    |
| Adjusted OR* (95% CI)                           | Reference            | 0.97 (0.82–1.15) | 0.79 (0.66–0.94) | 0.97 (0.76–1.22)    |

\*Adjusted for maternal age at first birth, calendar year at first birth, pre-pregnant body mass index, socio-occupational status, self-assessed health, disease, exercise in pregnancy, and smoking in pregnancy.

CI: Confidence interval; DNBC: Danish National Birth Cohort; OR: Odds ratio.



**Supplemental table 8: Frequent dyspareunia by mode of birth.**

|                                    | <b>Only spontaneous births</b> | <b>Instrumental vaginal birth, ever</b> | <b>Only c-sections</b> | <b>Spontaneous VBAC</b> | <b>Instrumental VBAC</b> | <b>C-section after vaginal birth</b> |
|------------------------------------|--------------------------------|-----------------------------------------|------------------------|-------------------------|--------------------------|--------------------------------------|
| <b>Dyspareunia, n=36 266</b>       |                                |                                         |                        |                         |                          |                                      |
| Cases (%)                          | 415 (2)                        | 97 (2)                                  | 166 (5)                | 30 (3)                  | 13 (3)                   | 74 (3)                               |
| Crude OR (95% CI)                  | Reference                      | 1.10 (0.88–1.38)                        | 3.06 (2.54–3.68)       | 0.84 (0.57–1.21)        | 1.63 (0.93–2.85)         | 1.39 (1.08–1.78)                     |
| Adjusted OR* (95% CI)              | Reference                      | 1.09 (0.87–1.36)                        | 2.82 (2.32–3.41)       | 0.83 (0.57–1.21)        | 1.59 (0.90–2.78)         | 1.32 (1.02–1.69)                     |
| <b>Entry dyspareunia, n=35 720</b> |                                |                                         |                        |                         |                          |                                      |
| Cases (%)                          | 181 (1)                        | 42 (1)                                  | 106 (4)                | 15 (1)                  | 8 (2)                    | 32 (1)                               |
| Crude OR (95% CI)                  | Reference                      | 1.10 (0.78–1.54)                        | 4.49 (2.36–3.51)       | 0.96 (0.57–1.63)        | 2.32 (1.13–4.73)         | 1.37 (0.94–2.00)                     |
| Adjusted OR* (95% CI)              | Reference                      | 1.02 (0.73–1.43)                        | 3.92 (3.03–5.05)       | 0.95 (0.56–1.61)        | 2.17 (1.06–4.45)         | 1.32 (0.90–1.93)                     |
| <b>Deep dyspareunia, n=35 720</b>  |                                |                                         |                        |                         |                          |                                      |
| Cases (%)                          | 263 (1)                        | 63 (1)                                  | 73 (2)                 | 18 (1)                  | 8 (2)                    | 44 (2)                               |
| Crude OR (95% CI)                  | Reference                      | 1.14 (0.86–1.50)                        | 2.10 (1.61–2.72)       | 0.79 (0.49–1.28)        | 1.58 (0.78–3.23)         | 1.30 (0.94–1.79)                     |
| Adjusted OR* (95% CI)              | Reference                      | 1.17 (0.89–1.55)                        | 2.01 (1.53–2.64)       | 0.79 (0.49–1.28)        | 1.60 (0.78–3.27)         | 1.21 (0.88–1.67)                     |

\*Adjusted for maternal age at first birth, calendar year at first birth, pre-pregnant body mass index, socio-occupational status, self-assessed health, disease, exercise in pregnancy, and smoking in pregnancy.

C-section: Caesarean section; CI: Confidence interval; OR: Odds ratio; VBAC: Vaginal birth after caesarean section.

## Supplemental table 9: Sexual problems by mode of birth in participants without vaginismus.

|                                                 | Only spontaneous births | Instrumental vaginal birth, ever | Only c-sections  | Spontaneous VBAC | Instrumental VBAC | C-section after vaginal birth |
|-------------------------------------------------|-------------------------|----------------------------------|------------------|------------------|-------------------|-------------------------------|
| <b>One or more sexual problem(s), n=35 343</b>  |                         |                                  |                  |                  |                   |                               |
| Cases (%)                                       | 8 196 (37)              | 1 759 (37)                       | 1 229 (41)       | 705 (37)         | 185 (43)          | 1 119 (39)                    |
| Crude OR (95% CI)                               | Reference               | 1.02 (0.96–1.09)                 | 1.21 (1.12–1.31) | 1.00 (0.91–1.11) | 1.33 (1.10–1.61)  | 1.10 (1.02–1.20)              |
| Adjusted OR* (95% CI)                           | Reference               | 1.02 (0.95–1.08)                 | 1.17 (1.08–1.27) | 1.00 (0.91–1.11) | 1.33 (1.09–1.61)  | 1.09 (1.01–1.18)              |
| <b>Reduced desire, n=36 139</b>                 |                         |                                  |                  |                  |                   |                               |
| Cases (%)                                       | 4 917 (22)              | 1 034 (21)                       | 702 (23)         | 431 (22)         | 103 (24)          | 639 (22)                      |
| Crude OR (95% CI)                               | Reference               | 0.99 (0.92–1.07)                 | 1.08 (0.99–1.18) | 1.03 (0.93–1.15) | 1.13 (0.90–1.41)  | 1.02 (0.93–1.11)              |
| Adjusted OR* (95% CI)                           | Reference               | 0.99 (0.92–1.07)                 | 1.04 (0.95–1.14) | 1.03 (0.92–1.15) | 1.13 (0.90–1.41)  | 1.00 (0.91–1.10)              |
| <b>Difficulty in obtaining orgasm, n=35 650</b> |                         |                                  |                  |                  |                   |                               |
| Cases (%)                                       | 2 822 (13)              | 631 (13)                         | 406 (13)         | 252 (13)         | 71 (17)           | 390 (13)                      |
| Crude OR (95% CI)                               | Reference               | 1.06 (0.97–1.16)                 | 1.08 (0.97–1.21) | 1.04 (0.91–1.20) | 1.39 (1.07–1.80)  | 1.09 (0.97–1.22)              |
| Adjusted OR* (95% CI)                           | Reference               | 1.05 (0.96–1.16)                 | 1.05 (0.94–1.18) | 1.04 (0.91–1.20) | 1.38 (1.07–1.79)  | 1.08 (0.97–1.21)              |
| <b>Insufficient lubrication, n=35 777</b>       |                         |                                  |                  |                  |                   |                               |
| Cases (%)                                       | 1 663 (7)               | 370 (8)                          | 318 (11)         | 131 (7)          | 42 (10)           | 290 (10)                      |
| Crude OR (95% CI)                               | Reference               | 1.05 (0.94–1.18)                 | 1.48 (1.30–1.67) | 0.91 (0.76–1.09) | 1.35 (0.98–1.87)  | 1.39 (1.22–1.59)              |
| Adjusted OR* (95% CI)                           | Reference               | 0.99 (0.88–1.12)                 | 1.36 (1.19–1.55) | 0.89 (0.74–1.08) | 1.28 (0.92–1.77)  | 1.35 (1.18–1.54)              |
| <b>Dyspareunia, n=35 894</b>                    |                         |                                  |                  |                  |                   |                               |
| Cases (%)                                       | 1 958 (9)               | 431 (9)                          | 432 (14)         | 160 (8)          | 51 (12)           | 301 (10)                      |
| Crude OR (95% CI)                               | Reference               | 1.04 (0.93–1.16)                 | 1.75 (1.56–1.96) | 0.94 (0.80–1.12) | 1.40 (1.04–1.89)  | 1.22 (1.07–1.38)              |
| Adjusted OR* (95% CI)                           | Reference               | 1.06 (0.95–1.18)                 | 1.73 (1.54–1.94) | 0.95 (0.80–1.12) | 1.42 (1.06–1.92)  | 1.18 (1.04–1.35)              |
| <b>Entry dyspareunia, n=35 352</b>              |                         |                                  |                  |                  |                   |                               |
| Cases (%)                                       | 613 (3)                 | 153 (3)                          | 223 (8)          | 60 (3)           | 21 (5)            | 109 (4)                       |
| Crude OR (95% CI)                               | Reference               | 1.19 (0.99–1.42)                 | 2.88 (2.46–3.38) | 1.14 (0.87–1.49) | 1.84 (1.18–2.88)  | 1.40 (1.13–1.72)              |
| Adjusted OR* (95% CI)                           | Reference               | 1.15 (0.96–1.37)                 | 2.71 (2.30–3.19) | 1.14 (0.87–1.49) | 1.80 (1.15–2.82)  | 1.38 (1.12–1.70)              |
| <b>Deep dyspareunia, n=35 352</b>               |                         |                                  |                  |                  |                   |                               |
| Cases (%)                                       | 1 367 (6)               | 269 (6)                          | 222 (8)          | 98 (5)           | 32 (8)            | 195 (7)                       |
| Crude OR (95% CI)                               | Reference               | 0.93 (0.81–1.06)                 | 1.24 (1.07–1.44) | 0.82 (0.66–1.01) | 1.25 (0.87–1.80)  | 1.12 (0.96–1.30)              |
| Adjusted OR* (95% CI)                           | Reference               | 0.96 (0.84–1.10)                 | 1.25 (1.07–1.45) | 0.83 (0.67–1.03) | 1.29 (0.90–1.87)  | 1.08 (0.93–1.27)              |

\*Adjusted for maternal age at first birth, calendar year at first birth, pre-pregnant body mass index, socio-occupational status, self-assessed health, disease, exercise in pregnancy, and smoking in pregnancy.

C-section: Caesarean section; CI: Confidence interval; OR: Odds ratio; VBAC: Vaginal birth after caesarean section.

1  
2 **Supplemental table 10: Participant Characteristics by Degree of Perineal Tear.**  
3

4

|                                                | <b>Degree of perineal tear</b> |                             |                     |                         |                             |
|------------------------------------------------|--------------------------------|-----------------------------|---------------------|-------------------------|-----------------------------|
|                                                | All<br>(n=29 253)              | None or first<br>(n=16 404) | Second<br>(n=4 267) | Episiotomy<br>(n=6 615) | Anal sphincter<br>(n=1 967) |
| <b>Age at first birth, n (%)</b>               |                                |                             |                     |                         |                             |
| <25                                            | 4 522 (15)                     | 2 763 (17)                  | 563 (13)            | 993 (15)                | 203 (10)                    |
| 25–29                                          | 16 073 (55)                    | 9 010 (55)                  | 2 394 (56)          | 3 566 (54)              | 1 103 (56)                  |
| 30–34                                          | 7 269 (25)                     | 3 926 (24)                  | 1 085 (25)          | 1 716 (26)              | 542 (28)                    |
| ≥35                                            | 1 389 (5)                      | 705 (4)                     | 225 (5)             | 340 (5)                 | 119 (6)                     |
| <b>Socio-occupational status, n (%)*</b>       |                                |                             |                     |                         |                             |
| Low                                            | 1 623 (6)                      | 939 (6)                     | 227 (6)             | 367 (6)                 | 90 (5)                      |
| Middle                                         | 9 094 (33)                     | 5 065 (33)                  | 1 367 (34)          | 2 081 (34)              | 581 (31)                    |
| High                                           | 16 804 (61)                    | 9 459 (61)                  | 2 421 (60)          | 3 748 (60)              | 1 176 (64)                  |
| Missing                                        | 1 732                          | 941                         | 252                 | 419                     | 120                         |
| <b>Prepregnant BMI, n (%)*</b>                 |                                |                             |                     |                         |                             |
| <18.5                                          | 1 169 (4)                      | 661 (4)                     | 120 (3)             | 320 (5)                 | 68 (4)                      |
| 18.5–24.9                                      | 19 579 (72)                    | 11 142 (73)                 | 2 731 (69)          | 4 401 (72)              | 1 305 (72)                  |
| 25.0–29.9                                      | 4 801 (18)                     | 2 573 (17)                  | 823 (21)            | 1 066 (17)              | 339 (19)                    |
| ≥30.0                                          | 1 654 (6)                      | 923 (6)                     | 280 (7)             | 340 (6)                 | 111 (6)                     |
| Missing                                        | 2 050                          | 1 105                       | 313                 | 488                     | 144                         |
| <b>Exercise in pregnancy, min/week, n (%)*</b> |                                |                             |                     |                         |                             |
| None                                           | 16 147 (57)                    | 8 981 (58)                  | 2 345 (58)          | 3 735 (60)              | 1 086 (59)                  |
| 1–180                                          | 9 112 (33)                     | 5 120 (33)                  | 1 372 (34)          | 2 008 (32)              | 612 (33)                    |
| >180                                           | 2 289 (8)                      | 1 382 (9)                   | 301 (7)             | 458 (7)                 | 148 (8)                     |
| Missing                                        | 1 705                          | 921                         | 249                 | 414                     | 121                         |
| <b>Smoking in pregnancy, n (%)*</b>            |                                |                             |                     |                         |                             |
| No smoking                                     | 22 390 (81)                    | 12 437 (80)                 | 3 304 (81)          | 5 096 (81)              | 1 553 (83)                  |
| Smoking cessation                              | 2 461 (9)                      | 1 415 (9)                   | 395 (10)            | 488 (8)                 | 163 (9)                     |
| Smoking                                        | 2 930 (11)                     | 1 749 (11)                  | 360 (9)             | 674 (11)                | 147 (8)                     |

5  
6  
7  
8  
9  
10  
11  
12  
13  
14  
15  
16  
17  
18  
19  
20  
21  
22  
23  
24  
25  
26  
27  
28  
29  
30  
31  
32  
33  
34  
35  
36  
37  
38  
39  
40  
41  
42  
43  
44  
45  
46  
47

**Supplemental table 10: Participant characteristics by degree of perineal tear (continued).**

|                                     | Degree of perineal tear |                             |                     |                         |                             |
|-------------------------------------|-------------------------|-----------------------------|---------------------|-------------------------|-----------------------------|
|                                     | All<br>(n=29 253)       | None or first<br>(n=16 404) | Second<br>(n=4 267) | Episiotomy<br>(n=6 615) | Anal sphincter<br>(n=1 967) |
| Missing                             | 1 472                   | 803                         | 208                 | 357                     | 104                         |
| <b>Self-assessed health, n (%)*</b> |                         |                             |                     |                         |                             |
| Very good                           | 15 564 (56)             | 8 814 (57)                  | 2 265 (56)          | 3 472 (56)              | 1 013 (54)                  |
| Normal                              | 11 408 (41)             | 6 357 (41)                  | 1 677 (42)          | 2 569 (41)              | 805 (43)                    |
| Not so good                         | 695 (3)                 | 361 (2)                     | 98 (2)              | 190 (3)                 | 46 (2)                      |
| Missing                             | 1 586                   | 872                         | 227                 | 384                     | 103                         |
| <b>Presence of disease, n (%)*†</b> |                         |                             |                     |                         |                             |
| No                                  | 16 450 (60)             | 9 049 (58)                  | 2 511 (62)          | 3 713 (60)              | 1 177 (63)                  |
| Yes                                 | 11 109 (40)             | 6 428 (42)                  | 1 518 (38)          | 2 484 (40)              | 679 (37)                    |
| Missing                             | 1 694                   | 927                         | 238                 | 418                     | 111                         |

\*Percentage of non-missing values.

†Diseases that, according to the women, had been confirmed by a physician, including hypertensive disorders, diseases of the heart, thyroid, or musculoskeletal system, epilepsy, diabetes, gynaecological diseases, and mental illness.

BMI: Body mass index.

1  
2 **Supplemental table 11: Frequent dyspareunia by degree of perineal tear.**

3

|                                      | No tear/first degree | Second degree    | Episiotomy       | Anal sphincter tear |
|--------------------------------------|----------------------|------------------|------------------|---------------------|
| 4 <b>Dyspareunia, n=28 398</b>       |                      |                  |                  |                     |
| 5 Cases (%)                          | 296 (2)              | 80 (2)           | 116 (2)          | 37 (2)              |
| 6 Crude OR (95% CI)                  | Reference            | 1.04 (0.81–1.34) | 0.98 (0.78–1.21) | 1.05 (0.74–1.48)    |
| 7 Adjusted OR* (95% CI)              | Reference            | 1.04 (0.81–1.34) | 0.99 (0.80–1.23) | 1.06 (0.75–1.50)    |
| 8 <b>Entry dyspareunia, n=28 006</b> |                      |                  |                  |                     |
| 9 Cases (%)                          | 122 (1)              | 32 (1)           | 53 (1)           | 20 (1)              |
| 10 Crude OR (95% CI)                 | Reference            | 1.02 (0.69–1.50) | 1.09 (0.78–1.50) | 1.38 (0.86–2.22)    |
| 11 Adjusted OR* (95% CI)             | Reference            | 1.01 (0.68–1.50) | 1.05 (0.76–1.46) | 1.32 (0.82–2.13)    |
| 12 <b>Deep dyspareunia, n=28 006</b> |                      |                  |                  |                     |
| 13 Cases (%)                         | 199 (1)              | 55 (1)           | 67 (1)           | 24 (1)              |
| 14 Crude OR (95% CI)                 | Reference            | 1.07 (0.79–1.45) | 0.84 (0.63–1.11) | 1.01 (0.66–1.55)    |
| 15 Adjusted OR* (95% CI)             | Reference            | 1.08 (0.80–1.47) | 0.87 (0.66–1.15) | 1.09 (0.71–1.67)    |

16 \*Adjusted for maternal age at first birth, calendar year at first birth, pre-pregnant body mass index, socio-occupational status, self-assessed health, disease, exercise in pregnancy, and  
17 smoking in pregnancy.

18 CI: Confidence interval; OR: Odds ratio.

Supplemental figure 1: Directed acyclic graph

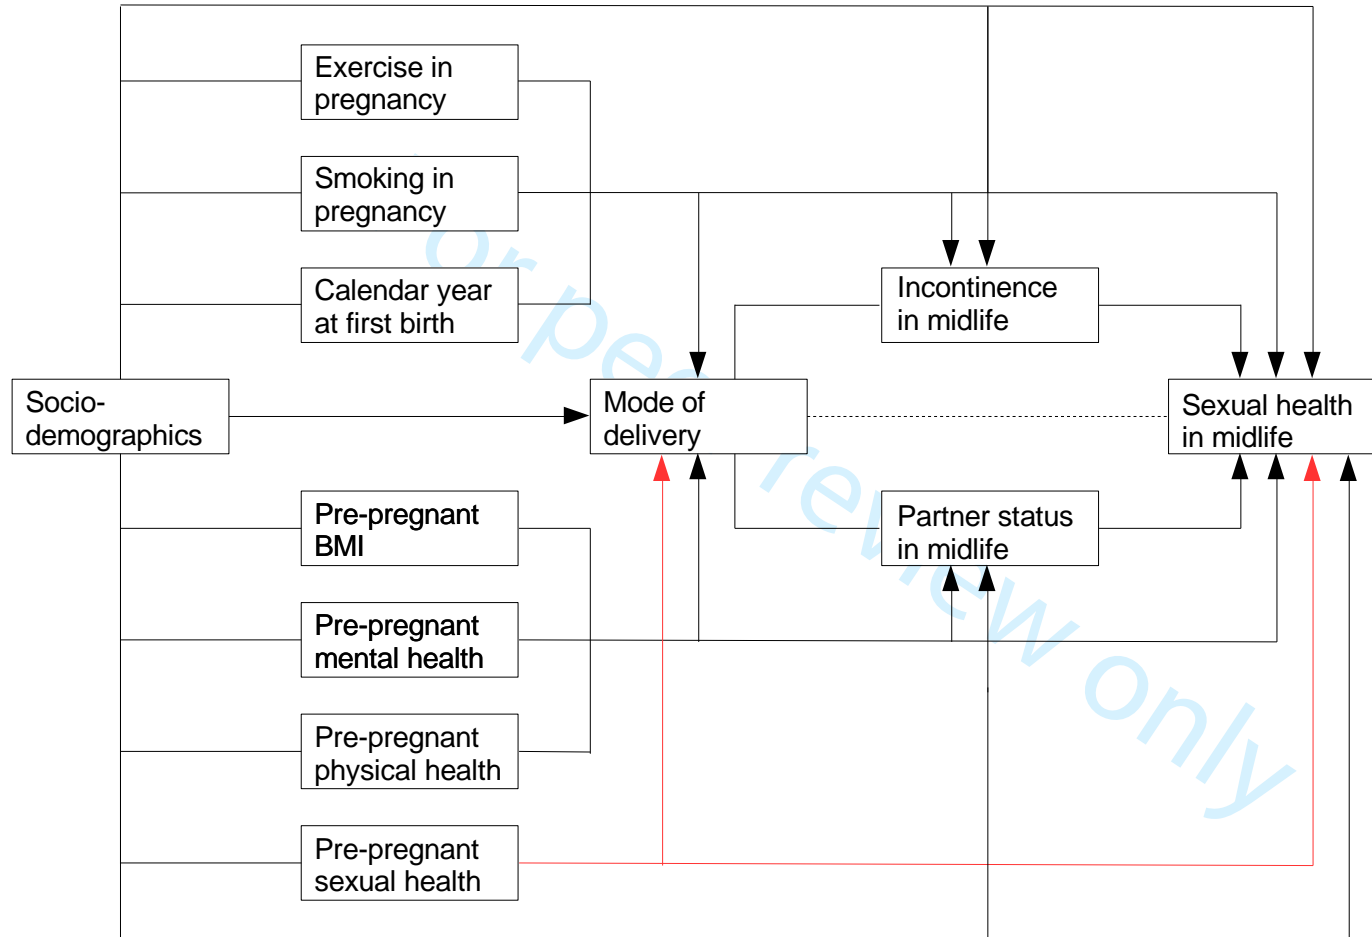

The red arrows represent unadjusted confounding from pre-pregnant sexual health. The dotted line represents the study question. BMI: Body mass index.

**We are most grateful to all three reviewers for helping us improve our manuscript. Below we explain how we have responded to each of their comments.**

Reviewer: 1

Thank you for the invitation to review this well-written manuscript in which the authors describe in much detail how the data in this large cohort study were collected and analysed. The topic is of interest for the readership of this journal. I doubt, however, if the conclusions can be drawn as firmly as the authors do. The clinical relevance of the outcomes probably is lower than suggested and many of the outcomes can be the result of multiple testing.

In the results section, authors present the change in odds, mentioned as a percentage. I feel that this should not be done.

- *We are grateful to the reviewer for pointing this out. Percentages are no longer presented.*

First, the outcome is quite prevalent, with 38% of all participants reporting one or more sexual health problems. As many readers may misjudge the value of odds (ratios) (by thinking that it could be interpreted as a (relative) risk, so risk increase), I feel that it is better to report (relative) risks in the first place. These figures are considerably lower. In the first part of the result section (mode of delivery) the reported 18%, 35% and 10% (odds) correspond with 10%, 19% and 6% increased risk.

- *This is a good point. The difference between the results presented as odds ratios and relative risks is now illustrated in the discussion, p. 9.*

Next, all odds ratios (or relative risks) should be presented in close conjunction with the absolute risk of the outcome, to help readers understand the clinical relevance of these results.

- *Absolute risk of the outcome is presented in abstract, results section and tables.*

Authors have chosen to present OR and CI. Although in general this provides information about the statistical significance of findings, it impairs the interpretation of multiple testing. I believe that p-values should also be presented and Bonferroni correction should be applied.

After doing so, I very much wonder which results/conclusions remain. To be honest, I feel that the value of this paper can only be judged after these changes are made.

- *We appreciate the reviewer's concern, and we understand that there are differing opinions about the correct use of p-values. We have chosen to report a measure of association and the confidence interval as a measure of precision, but not to report p-values. This is in accordance with recommendations made by Kenneth Rothman in both his comment to the American Statistical Association's statement on p-values, and in Modern Epidemiology, 3<sup>rd</sup> edition, where the use of Bonferroni methods is also discouraged.*

One other comment/question: although authors give detailed information about the reasons for the various (sub)analyses, it remains unclear to me why women without a partner were excluded from all

1  
2  
3 analyses? Was all information restricted to heterosexual sexual activities in women with a partner? If  
4 so, why?  
5

- 6 • *This is now elaborated upon in the section on study participants, p. 6.*

7  
8  
9  
10 Reviewer: 2

11  
12 This manuscript reports the findings of a large and rigorous registry-based study which combined  
13 long-term (i.e., mean interval since the women's first birth to the maternal follow-up 16 years)  
14 follow-up data from the Danish National Birth Cohort about the mode of delivery and perineal tears  
15 with survey data on self-reported sexual health and sexual problems. Questions were adapted from  
16 the Danish National Health Survey.

17  
18 Reported findings confirmed previously published data concerning the prevalence of sexual  
19 complaints (thus including sexual desire disorders), then further corroborating the goodness of the  
20 sample used.

21  
22 Findings demonstrated that for women who only had caesarean births, significant more problems  
23 were reported. Therefore, the main clinical take home message from the overall study was that  
24 current findings did not support choosing caesarean section over vaginal birth in order to prevent  
25 long-term sexual problems. Instead, vaginal birth appeared to be associated with fewer sexual  
26 problems, even when it involves instrumental delivery, or an episiotomy.  
27  
28

29  
30 Overall, the feeling of this Reviewer is that the study was conducted on very solid statistical bases  
31 and with an exceptional sample, both for the width and the rigor of the analyzed data.

32  
33 Honestly, this Reviewer believes that this type of results should be interpreted more in a sociological  
34 key and with references to possible results in other European countries or even outside Europe  
35 (although it could be really difficult since most countries can not carry out such an analysis because  
36 they do not have such a register that also considers the issue of sexual health). This is primarily  
37 because the choice of a caesarean rather than a spontaneous and physiological delivery can not be  
38 conditioned by the outcomes related to sexuality, and a purely based interpretation only concerning  
39 that aspect is eventually reductive.  
40  
41

- 42 • *We are thankful for this perspective. More references to studies in different settings have  
43 been added in the discussion, as far as the limited literature in the field allows, p. 11.*

44  
45  
46 Likewise, there is no reference to the aspects of pelvic floor dysfunctions that might lead to urinary  
47 incontinence, a retentive or disturbed micturition voiding attitude or an impaired defecation  
48 behaviour, all aspects deserving of a statistical correlation with the results of this analysis.  
49

- 50 • *This is a very important aspect when looking at mode of birth in a long-term follow-up. We  
51 have not included incontinence in the analyses, as it can be seen from the directed acyclic  
52 graph in the supplemental material that incontinence is a mediator between mode of birth  
53 and sexual health. In this study, we have been interested in the total effect of mode of birth  
54 on sexual health. To point out the relevance of considering risk of all pelvic floor dysfunctions  
55 when choosing mode of delivery, we have added a paragraph to the discussion that explains  
56 the findings from studies on mode of delivery and long-term risk of pelvic floor dysfunctions, p.  
57 11.*



1  
2  
3  
4 As a further aspect which deserves to be more largely discussed, the finding concerning the specific  
5 sexual problems that were more prevalent in women with a history of caesarean section, thus  
6 including reduced lubrication and dyspareunia. Those results should be more comprehensively  
7 discussed in biological terms and regarding potential pathophysiology pathways.  
8  
9

- 10 • *These findings are now discussed more in detail in the discussion, p. 11.*

11  
12 Reviewer: 3

13  
14  
15 Very interesting and important paper!

16 However, the discussion and - if possible - data analyses should considerate in more detail the  
17 "biopsychological mechanisms that cause sexual problems" and "may also reduce the likelihood of  
18 vaginal birth" (respectively a preference for an caesarean section) (s. page 10, line 5-6). This is rather  
19 obvious for vaginism, since women with this problem are expected to avoid vaginal birth. But it might  
20 also be true for women with other psychological problems (especially those with more anxiety,  
21 depression, somatoforme symptoms or insecure-avoidant personality traits). If there are any data  
22 allowing analysis for psychological problems, it would be interesting to include these as a possible  
23 confounding factor in the analyses, e.g. if the Data from the National Patient Registry - with all  
24 contacts with Danish hospitals - has specific data about what sort of department (psychiatric or  
25 psychosomatic) had been contacted by these women. Even if maternal requests for caesarean  
26 section were rare in Denmark in the 1990s and 2000s (page 10), those psychological problems in  
27 women might have influenced the gynecologists / physicians indication for (or against) a caesarean  
28 section.  
29  
30  
31  
32  
33

- 34 • *We agree that mental illness may be an important confounder, and we have emphasised this  
35 in the discussion. Mental illness is adjusted for in the analyses in the revised manuscript as  
36 well as in the previous version of the manuscript, cf. p. 10.*

37  
38  
39 Some minor suggestions:

40 1. In Table 1 I would find percentages of the different sociodemographic and health factors for each  
41 mode of delivery more helpful (than the percentages of each mode of delivery per factor), to see  
42 whether some (possible confounding / covariate) factor might be under- or overrepresented in the  
43 different mode of delivery. This table should also include statistics on whether there are any  
44 significant differences in these factors between the different modes of delivery.  
45  
46

- 47 • *We now provide column percentages in all tables and agree that this is much clearer. With  
48 regards to p-values, we refer to our answer to the comment on p-values from reviewer 1.*

49  
50 2. There is a contradiction (?) between the figures/percentages of women with at least one  
51 instrumental vaginal delivery on page 7, line 52/53 (n= 6 359 /17%) and those in table 1 (n=5 003,  
52 13%).  
53

- 54 • *We are grateful to the reviewer for pointing out that we have been unclear in our descriptions.  
55 We have clarified in the results section why these numbers are not the same, p. 8.*

STROBE Statement—Checklist of items that should be included in reports of *cohort studies*

|                              | Item No | Recommendation                                                                                                                                                                                    | Page No                  |
|------------------------------|---------|---------------------------------------------------------------------------------------------------------------------------------------------------------------------------------------------------|--------------------------|
| <b>Title and abstract</b>    | 1       | (a) Indicate the study's design with a commonly used term in the title or the abstract                                                                                                            | 1                        |
|                              |         | (b) Provide in the abstract an informative and balanced summary of what was done and what was found                                                                                               | 2-3                      |
| <b>Introduction</b>          |         |                                                                                                                                                                                                   |                          |
| Background/rationale         | 2       | Explain the scientific background and rationale for the investigation being reported                                                                                                              | 3                        |
| Objectives                   | 3       | State specific objectives, including any prespecified hypotheses                                                                                                                                  | 4                        |
| <b>Methods</b>               |         |                                                                                                                                                                                                   |                          |
| Study design                 | 4       | Present key elements of study design early in the paper                                                                                                                                           | 4                        |
| Setting                      | 5       | Describe the setting, locations, and relevant dates, including periods of recruitment, exposure, follow-up, and data collection                                                                   | 4                        |
| Participants                 | 6       | (a) Give the eligibility criteria, and the sources and methods of selection of participants. Describe methods of follow-up                                                                        | 6                        |
|                              |         | (b) For matched studies, give matching criteria and number of exposed and unexposed                                                                                                               | Not applicable           |
| Variables                    | 7       | Clearly define all outcomes, exposures, predictors, potential confounders, and effect modifiers. Give diagnostic criteria, if applicable                                                          | 4-6                      |
| Data sources/<br>measurement | 8*      | For each variable of interest, give sources of data and details of methods of assessment (measurement). Describe comparability of assessment methods if there is more than one group              | 4                        |
| Bias                         | 9       | Describe any efforts to address potential sources of bias                                                                                                                                         | 6-7                      |
| Study size                   | 10      | Explain how the study size was arrived at                                                                                                                                                         | 6                        |
| Quantitative variables       | 11      | Explain how quantitative variables were handled in the analyses. If applicable, describe which groupings were chosen and why                                                                      | 6-7                      |
| Statistical methods          | 12      | (a) Describe all statistical methods, including those used to control for confounding                                                                                                             | 7                        |
|                              |         | (b) Describe any methods used to examine subgroups and interactions                                                                                                                               | 7                        |
|                              |         | (c) Explain how missing data were addressed                                                                                                                                                       | 7                        |
|                              |         | (d) If applicable, explain how loss to follow-up was addressed                                                                                                                                    | Not applicable           |
|                              |         | (e) Describe any sensitivity analyses                                                                                                                                                             | 7                        |
| <b>Results</b>               |         |                                                                                                                                                                                                   |                          |
| Participants                 | 13*     | (a) Report numbers of individuals at each stage of study—eg numbers potentially eligible, examined for eligibility, confirmed eligible, included in the study, completing follow-up, and analysed | 6 and figure 1           |
|                              |         | (b) Give reasons for non-participation at each stage                                                                                                                                              | 6                        |
|                              |         | (c) Consider use of a flow diagram                                                                                                                                                                | Figure 1                 |
| Descriptive data             | 14*     | (a) Give characteristics of study participants (eg demographic, clinical, social) and information on exposures and potential confounders                                                          | 8-9                      |
|                              |         | (b) Indicate number of participants with missing data for each variable of interest                                                                                                               | Table 1 and supplement 8 |
|                              |         | (c) Summarise follow-up time (eg, average and total amount)                                                                                                                                       | 8                        |
| Outcome data                 | 15*     | Report numbers of outcome events or summary measures over time                                                                                                                                    | Table 2 and 3            |

|    |                          |    |                                                                                                                                                                                                              |
|----|--------------------------|----|--------------------------------------------------------------------------------------------------------------------------------------------------------------------------------------------------------------|
| 1  |                          |    |                                                                                                                                                                                                              |
| 2  |                          |    |                                                                                                                                                                                                              |
| 3  | Main results             | 16 | (a) Give unadjusted estimates and, if applicable, confounder-adjusted estimates and their precision (eg, 95% confidence interval). Make clear which confounders were adjusted for and why they were included |
| 4  |                          |    |                                                                                                                                                                                                              |
| 5  |                          |    |                                                                                                                                                                                                              |
| 6  |                          |    | (b) Report category boundaries when continuous variables were categorized                                                                                                                                    |
| 7  |                          |    | (c) If relevant, consider translating estimates of relative risk into absolute risk for a meaningful time period                                                                                             |
| 8  |                          |    |                                                                                                                                                                                                              |
| 9  |                          |    |                                                                                                                                                                                                              |
| 10 | Other analyses           | 17 | Report other analyses done—eg analyses of subgroups and interactions, and sensitivity analyses                                                                                                               |
| 11 |                          |    |                                                                                                                                                                                                              |
| 12 |                          |    |                                                                                                                                                                                                              |
| 13 | <b>Discussion</b>        |    |                                                                                                                                                                                                              |
| 14 | Key results              | 18 | Summarise key results with reference to study objectives                                                                                                                                                     |
| 15 | Limitations              | 19 | Discuss limitations of the study, taking into account sources of potential bias or imprecision. Discuss both direction and magnitude of any potential bias                                                   |
| 16 |                          |    |                                                                                                                                                                                                              |
| 17 |                          |    |                                                                                                                                                                                                              |
| 18 | Interpretation           | 20 | Give a cautious overall interpretation of results considering objectives, limitations, multiplicity of analyses, results from similar studies, and other relevant evidence                                   |
| 19 |                          |    |                                                                                                                                                                                                              |
| 20 | Generalisability         | 21 | Discuss the generalisability (external validity) of the study results                                                                                                                                        |
| 21 |                          |    |                                                                                                                                                                                                              |
| 22 | <b>Other information</b> |    |                                                                                                                                                                                                              |
| 23 | Funding                  | 22 | Give the source of funding and the role of the funders for the present study and, if applicable, for the original study on which the present article is based                                                |
| 24 |                          |    |                                                                                                                                                                                                              |
| 25 |                          |    |                                                                                                                                                                                                              |
| 26 |                          |    |                                                                                                                                                                                                              |
| 27 |                          |    |                                                                                                                                                                                                              |
| 28 |                          |    |                                                                                                                                                                                                              |
| 29 |                          |    |                                                                                                                                                                                                              |
| 30 |                          |    |                                                                                                                                                                                                              |
| 31 |                          |    |                                                                                                                                                                                                              |
| 32 |                          |    |                                                                                                                                                                                                              |
| 33 |                          |    |                                                                                                                                                                                                              |
| 34 |                          |    |                                                                                                                                                                                                              |
| 35 |                          |    |                                                                                                                                                                                                              |
| 36 |                          |    |                                                                                                                                                                                                              |
| 37 |                          |    |                                                                                                                                                                                                              |
| 38 |                          |    |                                                                                                                                                                                                              |
| 39 |                          |    |                                                                                                                                                                                                              |
| 40 |                          |    |                                                                                                                                                                                                              |
| 41 |                          |    |                                                                                                                                                                                                              |
| 42 |                          |    |                                                                                                                                                                                                              |
| 43 |                          |    |                                                                                                                                                                                                              |
| 44 |                          |    |                                                                                                                                                                                                              |
| 45 |                          |    |                                                                                                                                                                                                              |
| 46 |                          |    |                                                                                                                                                                                                              |
| 47 |                          |    |                                                                                                                                                                                                              |
| 48 |                          |    |                                                                                                                                                                                                              |
| 49 |                          |    |                                                                                                                                                                                                              |
| 50 |                          |    |                                                                                                                                                                                                              |
| 51 |                          |    |                                                                                                                                                                                                              |
| 52 |                          |    |                                                                                                                                                                                                              |
| 53 |                          |    |                                                                                                                                                                                                              |
| 54 |                          |    |                                                                                                                                                                                                              |
| 55 |                          |    |                                                                                                                                                                                                              |
| 56 |                          |    |                                                                                                                                                                                                              |
| 57 |                          |    |                                                                                                                                                                                                              |
| 58 |                          |    |                                                                                                                                                                                                              |
| 59 |                          |    |                                                                                                                                                                                                              |
| 60 |                          |    |                                                                                                                                                                                                              |

\*Give information separately for exposed and unexposed groups.

**Note:** An Explanation and Elaboration article discusses each checklist item and gives methodological background and published examples of transparent reporting. The STROBE checklist is best used in conjunction with this article (freely available on the Web sites of PLoS Medicine at <http://www.plosmedicine.org/>, Annals of Internal Medicine at <http://www.annals.org/>, and Epidemiology at <http://www.epidem.com/>). Information on the STROBE Initiative is available at <http://www.strobe-statement.org>.

# BMJ Open

## Mode of birth and long-term sexual health: a follow-up study of mothers in the Danish National Birth Cohort

|                                 |                                                                                                                                                                                                                                                                                                                                                                                                                                                                                                                                                                                                                                                                                                                  |
|---------------------------------|------------------------------------------------------------------------------------------------------------------------------------------------------------------------------------------------------------------------------------------------------------------------------------------------------------------------------------------------------------------------------------------------------------------------------------------------------------------------------------------------------------------------------------------------------------------------------------------------------------------------------------------------------------------------------------------------------------------|
| Journal:                        | <i>BMJ Open</i>                                                                                                                                                                                                                                                                                                                                                                                                                                                                                                                                                                                                                                                                                                  |
| Manuscript ID                   | bmjopen-2019-029517.R1                                                                                                                                                                                                                                                                                                                                                                                                                                                                                                                                                                                                                                                                                           |
| Article Type:                   | Original research                                                                                                                                                                                                                                                                                                                                                                                                                                                                                                                                                                                                                                                                                                |
| Date Submitted by the Author:   | 08-Jul-2019                                                                                                                                                                                                                                                                                                                                                                                                                                                                                                                                                                                                                                                                                                      |
| Complete List of Authors:       | Hjorth, Sarah; Syddansk Universitet, Department of Clinical Research, Research Unit of Obstetrics and Gynecology<br>Kirkegaard, Helene; University of Southern Denmark , Department of Clinical Research, Research Unit of Obstetrics and Gynecology<br>Olsen, Jørn; Aarhus University, Department of Clinical Epidemiology; University of California Los Angeles, Department of Epidemiology, Fielding School of Public Health<br>Thornton, Jim; University of Nottingham<br>Nøhr, Ellen; Syddansk Universitet Det Sundhedsvidenskabelige Fakultet, Department of Clinical Research, Research Unit of Obstetrics and Gynecology; University of South-Eastern Norway, Centre of Women's, Family and Child Health |
| <b>Primary Subject Heading</b>: | Obstetrics and gynaecology                                                                                                                                                                                                                                                                                                                                                                                                                                                                                                                                                                                                                                                                                       |
| Secondary Subject Heading:      | Epidemiology                                                                                                                                                                                                                                                                                                                                                                                                                                                                                                                                                                                                                                                                                                     |
| Keywords:                       | OBSTETRICS, EPIDEMIOLOGY, PUBLIC HEALTH                                                                                                                                                                                                                                                                                                                                                                                                                                                                                                                                                                                                                                                                          |
|                                 |                                                                                                                                                                                                                                                                                                                                                                                                                                                                                                                                                                                                                                                                                                                  |

SCHOLARONE™  
Manuscripts

1  
2  
3  
4  
5  
6  
7 **Mode of birth and long-term sexual health:**  
8  
9 **a follow-up study of mothers in the Danish National Birth Cohort**  
10  
11  
12  
13  
14

15 Sarah Hjorth MSc<sup>1</sup>, Helene Kirkegaard PhD<sup>1</sup>, Jørn Olsen PhD<sup>2</sup>, Jim G Thornton MD<sup>3</sup>,  
16 Ellen A Nohr PhD<sup>1,4</sup>  
17  
18  
19  
20  
21  
22

23  
24 <sup>1</sup> Research Unit of Gynecology and Obstetrics, Department of Clinical Research, University of  
25 Southern Denmark, Odense, Denmark  
26

27 <sup>2</sup> Department of Clinical Epidemiology, Aarhus University Hospital, Aarhus, Denmark  
28

29 <sup>3</sup> Department of Child Health, Obstetrics and Gynaecology, University of Nottingham, Nottingham,  
30 UK  
31

32 <sup>4</sup> Centre of Women's, Family and Child Health, University of South-Eastern Norway, Kongsberg,  
33 Norway  
34  
35  
36

37 Word count: 3 209 words  
38  
39  
40

41 Correspondence to

42 Sarah Hjorth

43 Pharmacology and Drug Safety Research Group, Department of Pharmacy, Faculty of  
44 Mathematics and Natural Sciences, University of Oslo, P.O 1068, Blindern, 0316 Oslo, Norway  
45  
46  
47

48 email: [s.h.andersen@farmasi.uio.no](mailto:s.h.andersen@farmasi.uio.no)

49 telephone : +45 50564818  
50  
51  
52  
53  
54  
55  
56  
57  
58  
59  
60

## ABSTRACT

### Objectives

To investigate the relation between mode of birth and women's long-term sexual health.

### Design

Maternal follow-up of the Danish National Birth Cohort (1996-2002) in 2013-2014 including questions on sexual health. Logistic regression was used to relate registry-based information about mode of birth and perineal tears with data on sexual problems.

### Setting

Denmark.

### Participants

Of 82 569 eligible mothers in the Danish National Birth Cohort, 43 639 (53%) completed the follow-up. Of these, 37 417 women had a partner, and answered at least one question on sexual health.

### Main outcome measures

Self-reported sexual health.

### Results

Participants were on average 44 years old, and 16 years after their first birth. The frequency of sexual problems among women with only spontaneous vaginal births, the reference group, was 37%. For women who only had caesarean sections, more problems were reported (OR 1.18; 95% CI 1.09 to 1.28). For women who had a spontaneous vaginal birth subsequent to a caesarean, and for women with only vaginal births who had experienced one or more instrumental vaginal births, the odds of sexual problems did not differ from women with only spontaneous vaginal births (OR 1.00; 95% CI 0.91 to 1.11) and (OR 1.01; 95% CI 0.95 to 1.08) respectively.

### Conclusions

These findings indicate that caesarean section does not protect against long-term sexual problems. Rather, vaginal birth, even after caesarean section, was associated with fewer long-term sexual problems.

### Keywords

Mode of birth, sexual health, caesarean section, perineal tears, Danish National Birth Cohort

## STRENGTHS AND LIMITATIONS OF THIS STUDY

- This study is the largest study on mode of birth and long-term sexual health to date with 37 417 participants, allowing for a detailed investigation of the exposure.
- Information on mode of birth was obtained from registries, limiting the risk of differential misclassification.
- Participation in the maternal follow-up was 53%, which may limit the generalisability of the study.
- Chance and residual confounding, including confounding by birth route indication, cannot be ruled out, but the results were stable in sensitivity analyses.

## INTRODUCTION

Sexual health is an important part of reproductive health,<sup>1</sup> and quality of life.<sup>2</sup> It is influenced by many factors, including women's reproductive history.<sup>3</sup> Short term studies have shown that mode of birth, and perineal injury are associated with sexual problems up to 18 months post-partum.<sup>3-6</sup> Although the only randomised trial of mode of birth, where one group of women was allocated to planned caesarean section and the other to planned vaginal birth, reported no significant differences after two years of follow-up, the point estimates for pain and being unhappy during sex marginally favoured caesarean section.<sup>7</sup> There is also a widespread lay belief that caesarean section, perhaps by maintaining vaginal tone, or avoiding perineal injury, might improve sexual function.

The results of longer-term studies are inconsistent.<sup>8-12</sup> One found reduced desire in women with previous instrumental birth, and reduced lubrication in women with a history including both caesarean section and vaginal birth.<sup>12</sup> Another reported no associations between mode of birth and sexual problems.<sup>10</sup> For women with anal sphincter tears, some studies found no effect,<sup>9,12</sup> while others observed a higher prevalence of reduced lubrication<sup>10</sup> or dyspareunia.<sup>11</sup>

We investigated the associations between reproductive history and long-term sexual problems in a large cohort of Danish mothers. Our hypotheses were that instrumental vaginal birth would be associated with a higher risk of sexual problems than spontaneous birth whereas caesarean section would not, and that women with birth induced perineal injuries would have more sexual problems than women without.

## METHODS

## Data sources

The study was based on data from the Danish National Birth Cohort.<sup>13,14</sup> The cohort enrolled 91 386 women in early pregnancy between 1996 and 2002, about 30% of births in that period.<sup>15</sup> The first interview, conducted around week 16 of gestation, included information on health, lifestyle, and socio-occupational factors. Participants consented to use of their information from Danish health and social registries. Between December 2013 and December 2014, participants were invited to respond to a questionnaire on physical, mental, and sexual health. Altogether, 53% (43 639 women) of eligible mothers participated.<sup>16</sup>

Under Danish law, ethical permission is not required for public registry-based studies.<sup>17</sup> The Danish National Birth Cohort was initially approved by the Committee on Biomedical Research Ethics (reference no. [KF] 01-471/94) and all participants gave written, informed consent. This study was also approved by the Danish Data Protection Agency (approval no. 2014-41-2848).

## Outcome

The outcome was self-reported sexual health. Participants provided information about whether their sexual needs had been met in the past year, the frequency of sexual activity with a partner, their experience of dyspareunia, vaginismus, insufficient lubrication, and difficulty in getting an orgasm. They were also asked about sexual desire, and whether any lack of desire was considered problematic by them or their partner. Questions were adapted from the Danish National Health Survey<sup>18</sup> (supplemental table 1).

Four types of sexual difficulties were dichotomised into the presence or absence of a sexual problem in the past year. Reduced lubrication or difficulty in achieving orgasm were considered a problem if the women had answered that they 'often' or 'always' had experienced these difficulties during sex with their partner. Dyspareunia was classified by location, at the vaginal introitus (entry dyspareunia) and/or deep in the abdomen (deep dyspareunia), and considered a problem if women reported that they 'sometimes', 'often' or 'always' had either type. In addition, we defined frequent dyspareunia if it was present 'often' or 'always'. Reduced sexual desire was considered a problem if women both 'sometimes', 'often' or 'always' experienced it, and also considered it a problem. All four specific sexual problems (reduced lubrication, difficulty in achieving orgasm, dyspareunia, and reduced sexual desire) were combined in one outcome, 'the presence or absence of one or more sexual problems within the past year'.



## Exposures

Exposures were mode of birth and perineal tears from the woman's entire reproductive history. These were obtained from the Danish Medical Birth Registry, which contains data about all live and still births since 1973,<sup>19</sup> and from the National Patient Registry, which contains data about all contacts with Danish hospitals since 1977.<sup>20</sup> Registry data up to the date the woman answered the follow-up questionnaire were linked to cohort participants through personal identification numbers. Mode of birth was categorised as only spontaneous vaginal births, one or more instrumental vaginal births in women with only vaginal births, only caesarean sections, one or more spontaneous vaginal births after a first caesarean section, instrumental vaginal birth in women who birthed vaginally after a first caesarean section, and caesarean section after vaginal birth.

Data on perineal tears were first kept and stored in Denmark from 1994 using ICD10. For this study, perineal tears were categorised as no tear, first (ICD10 code O70.0), second (O70.1), third (O70.2), or fourth degree tear (O70.3), or episiotomy (procedure code KTMD00). During the years, the women from the cohort gave birth, it was common practice to register only sutured tears, and many first degree tears were left unsutured. No tear and first degree tears were therefore combined into one category. As fourth degree tears amount to only 1% of perineal tears, they were combined with third degree tears in a single category 'anal sphincter tear'. Data on third and fourth degree tears analysed separately is available in supplemental table 2. Anal sphincter tear together with an episiotomy was categorised as the former.

## Potential covariates

Covariates were chosen a priori based on a literature review, and depicted in directed acyclic graphs<sup>21</sup> (supplemental figure 1). Maternal age at first birth, and calendar year at first birth were obtained from the Medical Birth Registry. Information about socio-occupational status, pre-pregnant body mass index (BMI), mental-, and physical health, and smoking and exercise in pregnancy came from the woman's first interview in the Danish National Birth Cohort, and was thus related to her first childbirth in the cohort. For 51% of participants, this was also their first birth. Socio-occupational status was categorised as high (four or more years of education after high school, or job as manager), middle (skilled manual work, office or service work), or low (unskilled work or unemployment).<sup>22</sup> Diseases were defined as those that had been diagnosed by a physician, and included hypertensive disorders, diseases of the heart, thyroid, or musculoskeletal system, epilepsy, diabetes, gynaecological diseases, and mental illness. Self-assessed health at the first pregnancy, smoking in pregnancy, and exercise in pregnancy were categorised as shown in table 1.

## Study population

Women who participated in the follow-up and answered at least one question on sexual health (n=42 132) were eligible. Two separate analyses were done, one for mode of birth, and one for degree of perineal tear. Study populations varied slightly in the two analyses (figure 1). For both study populations, we excluded 4 715 (11%) women without a partner, as they were not considered comparable with women with a partner when it came to sexual activity and sexual problems.

Women without a partner were less sexually active, less likely to feel that their sexual needs were met, and less likely to consider any reduced desire problematic. The sexual health of women with and without a partner can be compared in supplemental table 1. The study included women with male and/or female partners. In the study population for mode of birth, 37 417 women were included. For the analysis on perineal tears, 3 240 women (8%) who only had caesarean sections were excluded. Another 4 920 women (12%) with births before 1994, when degree of perineal tear registration started, were excluded, leaving 29 253 women in the study population.

*Figure 1 about here*

## Participant and public involvement

Some study participants were involved in developing and testing the questionnaire in the maternal follow-up. The results of the research conducted in the Danish National Birth Cohort are available at [www.dnbc.dk](http://www.dnbc.dk).

## Statistical analysis

To estimate the association between mode of birth, or degree of perineal tear, and the prevalence of sexual problems, we used logistic regression for calculating odds ratios (ORs) with 95% confidence intervals (CIs). For mode of birth, the reference group was women who had only delivered spontaneously. For perineal tears, the reference group was "no tear or first degree tear". Multiple logistic regressions were adjusted for age, year at first birth, and pre-pregnant BMI as continuous variables, and socio-occupational status, self-assessed health, disease, exercise, and smoking in pregnancy as categorical variables. The number of answers available for analysis for each outcome differed, as the response option 'I do not wish to answer this question' was provided for all questions on sexual health, and only participants with complete information on exposure and outcome were analysed. To address missing data on covariates, multivariate imputation by chained equations was done, and the number of datasets created was 20, as no difference in results was seen

1  
2 when moving from ten to 20 datasets. As recommended by Sterne et al.,<sup>23</sup> both exposure, outcome,  
3 and covariates with complete information were included in the imputation model. Complete case  
4 analyses were done as well, and the results did not differ substantially from the results based on  
5 multiple imputation (supplemental tables 3 and 4). For non-participants in the maternal follow-up,  
6 we also had available data on mode of birth and degree of tear, and the distributions were compared  
7 to that observed in participants and found to be similar (supplemental table 5). Because some  
8 categories of mode of birth could only include women with more than one child, the categorisation  
9 may be seen as a conditioning on parity or future events. In a sensitivity analysis, we therefore  
10 adjusted for parity and year at last birth, even though they were also considered intermediates in the  
11 directed acyclic graph. As vaginismus is associated with a lower prevalence of vaginal births, a  
12 second sensitivity analysis excluded women with vaginismus. In a third sensitivity analysis, the  
13 population was restricted to women who had their first child in the Danish National Birth Cohort, as  
14 women who choose to have another child may represent a selected group, where women who have  
15 the worst experiences of childbirth, or who have sequelae, are under-represented. All analyses were  
16 done using Stata 13.1 (StataCorp, College Station, Texas, USA).  
17  
18  
19  
20  
21  
22  
23  
24  
25  
26  
27  
28

## 29 **RESULTS**

30  
31 The mean age of participants at follow-up was 44 years (SD 4.4), and the mean interval since the  
32 women's first birth to the maternal follow-up 16 years (SD 3.8, range 11 to 40 years). Socio-  
33 occupational status, BMI, and smoking and exercise practice in pregnancy are shown in table 1.  
34 Most women, 23 608 (63%), had delivered all of their children spontaneously. For 6 359 women  
35 (17%), their reproductive history included at least one instrumental vaginal birth, almost all of  
36 which were vacuum extractions (99%). Some of these women also had a caesarean section in their  
37 reproductive history. In 8 806 women (24%), at least one birth had been by caesarean section, and 3  
38 244 women (8%) had only caesarean sections.  
39  
40  
41  
42  
43  
44  
45  
46  
47  
48  
49  
50  
51  
52  
53  
54  
55  
56  
57  
58  
59  
60

**Table 1. Participant characteristics by mode of birth.**

|                                                | Mode of birth     |                                          |                                                  |                              |                                  |                                 |                                               |
|------------------------------------------------|-------------------|------------------------------------------|--------------------------------------------------|------------------------------|----------------------------------|---------------------------------|-----------------------------------------------|
|                                                | All<br>(n=37 417) | Only spontaneous<br>births<br>(n=23 608) | Instrumental<br>vaginal birth, ever<br>(n=5 003) | Only c-sections<br>(n=3 244) | Spontaneous<br>VBAC<br>(n=2 038) | Instrumental<br>VBAC<br>(n=457) | C-section after<br>vaginal birth<br>(n=3 067) |
| <b>Age at first birth, n (%)</b>               |                   |                                          |                                                  |                              |                                  |                                 |                                               |
| <25                                            | 7 140 (19)        | 4 864 (21)                               | 775 (15)                                         | 363 (11)                     | 356 (17)                         | 75 (16)                         | 707 (23)                                      |
| 25–29                                          | 19 839 (53)       | 12 758 (54)                              | 2 656 (53)                                       | 1 433 (44)                   | 1 144 (56)                       | 233 (51)                        | 1 615 (53)                                    |
| 30–34                                          | 8 614 (23)        | 5 063 (21)                               | 1 280 (26)                                       | 1 024 (32)                   | 465 (23)                         | 125 (27)                        | 657 (21)                                      |
| ≥35                                            | 1 824 (5)         | 923 (4)                                  | 292 (6)                                          | 424 (13)                     | 73 (4)                           | 24 (5)                          | 88 (3)                                        |
| <b>Socio-occupational status, n (%)*</b>       |                   |                                          |                                                  |                              |                                  |                                 |                                               |
| Low                                            | 2 233 (6)         | 1 393 (6)                                | 265 (6)                                          | 202 (7)                      | 123 (6)                          | 28 (7)                          | 222 (8)                                       |
| Middle                                         | 11 832 (34)       | 7 444 (34)                               | 1 562 (33)                                       | 1 056 (35)                   | 656 (34)                         | 133 (31)                        | 981 (34)                                      |
| High                                           | 21 059 (60)       | 13 318 (60)                              | 2 875 (61)                                       | 1 779 (59)                   | 1 133 (59)                       | 269 (63)                        | 1 685 (58)                                    |
| Missing                                        | 2 293             | 1 453                                    | 301                                              | 207                          | 126                              | 27                              | 179                                           |
| <b>Prepregnant BMI, n (%)*</b>                 |                   |                                          |                                                  |                              |                                  |                                 |                                               |
| <18.5                                          | 1 417 (4)         | 906 (4)                                  | 196 (4)                                          | 87 (3)                       | 82 (4)                           | 26 (6)                          | 120 (4)                                       |
| 18.5–24.9                                      | 24 554 (71)       | 15 991 (73)                              | 3 275 (70)                                       | 1 843 (62)                   | 1 286 (68)                       | 268 (63)                        | 1 891 (66)                                    |
| 25.0–29.9                                      | 6 405 (18)        | 3 748 (17)                               | 899 (19)                                         | 697 (23)                     | 369 (20)                         | 93 (22)                         | 599 (21)                                      |
| ≥30.0                                          | 2 321 (7)         | 1 249 (6)                                | 278 (6)                                          | 355 (12)                     | 150 (8)                          | 37 (9)                          | 252 (9)                                       |
| Missing                                        | 2 720             | 1 714                                    | 355                                              | 262                          | 151                              | 33                              | 205                                           |
| <b>Exercise in pregnancy, min/week, n (%)*</b> |                   |                                          |                                                  |                              |                                  |                                 |                                               |
| None                                           | 21 156 (60)       | 13 137 (59)                              | 2 881 (61)                                       | 1 888 (62)                   | 1 149 (60)                       | 274 (64)                        | 1 827 (63)                                    |
| 1–180                                          | 11 184 (32)       | 7 222 (33)                               | 1 475 (31)                                       | 900 (30)                     | 615 (32)                         | 122 (28)                        | 850 (29)                                      |
| >180                                           | 2 826 (8)         | 1 825 (8)                                | 348 (7)                                          | 255 (8)                      | 148 (8)                          | 33 (8)                          | 217 (8)                                       |
| Missing                                        | 2 251             | 1 424                                    | 299                                              | 201                          | 126                              | 28                              | 173                                           |
| <b>Smoking in pregnancy, n (%)*</b>            |                   |                                          |                                                  |                              |                                  |                                 |                                               |

**Table 1. Participant characteristics by mode of birth (continued)**

|                                     | Mode of birth     |                                          |                                                     |                              |                                  |                                 |                                                  |
|-------------------------------------|-------------------|------------------------------------------|-----------------------------------------------------|------------------------------|----------------------------------|---------------------------------|--------------------------------------------------|
|                                     | All<br>(n=37 417) | Only spontaneous<br>births<br>(n=23 608) | Instrumental<br>vaginal birth,<br>ever<br>(n=5 003) | Only c-sections<br>(n=3 244) | Spontaneous<br>VBAC<br>(n=2 038) | Instrumental<br>VBAC<br>(n=457) | C-section<br>after<br>vaginal birth<br>(n=3 067) |
| No smoking                          | 28 295 (80)       | 17 973 (80)                              | 3 774 (80)                                          | 2 372 (77)                   | 1 545 (80)                       | 352 (81)                        | 2 279 (78)                                       |
| Smoking cessation                   | 3 099 (9)         | 1 892 (8)                                | 425 (9)                                             | 318 (10)                     | 173 (9)                          | 28 (6)                          | 263 (9)                                          |
| Smoking                             | 4062 (11)         | 2 489 (11)                               | 536 (11)                                            | 378 (12)                     | 222 (11)                         | 54 (12)                         | 383 (13)                                         |
| Missing                             | 1 961             | 1 254                                    | 268                                                 | 176                          | 98                               | 23                              | 142                                              |
| <b>Self-assessed health, n (%)*</b> |                   |                                          |                                                     |                              |                                  |                                 |                                                  |
| Very good                           | 19 750 (56)       | 12 630 (57)                              | 2 642 (56)                                          | 1 631 (53)                   | 1 079 (56)                       | 228 (53)                        | 1 540 (53)                                       |
| Normal                              | 14 578 (41)       | 9 056 (41)                               | 1 963 (42)                                          | 1 319 (43)                   | 798 (41)                         | 195 (45)                        | 1 247 (43)                                       |
| Not so good                         | 970 (3)           | 576 (3)                                  | 116 (2)                                             | 109 (4)                      | 47 (2)                           | 11 (3)                          | 111 (4)                                          |
| Missing                             | 2 119             | 1 346                                    | 282                                                 | 185                          | 114                              | 23                              | 169                                              |
| <b>Presence of disease, n (%)*†</b> |                   |                                          |                                                     |                              |                                  |                                 |                                                  |
| No                                  | 20 305 (58)       | 13 105 (59)                              | 2 774 (59)                                          | 1 577 (52)                   | 1 095 (57)                       | 251 (58)                        | 1 503 (52)                                       |
| Yes                                 | 14 855 (42)       | 9 070 (41)                               | 1 932 (41)                                          | 1 468 (48)                   | 820 (43)                         | 182 (42)                        | 1 383 (48)                                       |
| Missing                             | 2 257             | 1 433                                    | 297                                                 | 199                          | 123                              | 24                              | 181                                              |

\*Percentage of non-missing values.

†Diseases that, according to the women, had been confirmed by a physician, including hypertensive disorders, diseases of the heart, thyroid, or musculoskeletal system, epilepsy, diabetes, gynaecological diseases, and mental illness.

BMI: Body mass index. C-section: Caesarean section. VBAC: Vaginal birth after caesarean section.

1  
2 Of the 36 691 women who answered the question on sexual needs, 25 289 women (69%) felt that  
3 their needs had been met completely or almost completely within the past year (supplemental table  
4 1). Of the 35 710 women who answered all questions on sexual problems, 13 449 (38%) reported  
5 one or more sexual problems. Reduced or lacking sexual desire was the most prevalent sexual  
6 difficulty, and 7 945 women (22%) had experienced reduced desire to an extent that they found  
7 problematic for themselves. Reduced desire to an extent that the women felt was problematic for  
8 their partner was experienced by 35%.

### 15 **Mode of birth**

16 Compared to women with only spontaneous vaginal births, there was no evidence for a difference in  
17 the prevalence of any sexual problems in women with instrumental vaginal births (table 2). Odds  
18 for one or more sexual problems were increased in women who had only delivered by caesarean  
19 section (OR 1.18; 95% CI 1.09 to 1.28), in women who had an instrumental vaginal birth after  
20 caesarean section (OR 1.35; 95% CI 1.11 to 1.64), and in women who had a caesarean section after  
21 vaginal birth (OR 1.10; 95% CI 1.01 to 1.19), but not in women with spontaneous vaginal birth  
22 after caesarean section (OR 1.00; 95% CI 0.91 to 1.11). The specific sexual problems that were  
23 more prevalent in women with a history of caesarean section were reduced lubrication (OR=1.41,  
24 95% CI 1.24 to 1.60) and dyspareunia (OR=1.78, 95% CI 1.59 to 1.99), including frequent  
25 dyspareunia (OR=2.82, 95% CI 2.32 to 3.41) (supplemental table 6). When asked about the  
26 localisation of the pain, odds ratios for women with only caesarean section were higher for entry  
27 dyspareunia (OR=2.76, 95% CI 2.36 to 3.24) than for deep dyspareunia (OR=1.25, 95% CI 1.08 to  
28 1.45).

Table 2: Sexual problems by mode of birth.

|                                                 | Only spon-<br>taneous<br>births | Instrumental<br>vaginal<br>birth, ever | Only c-sections  | Spontaneous VBAC | Instrumental VBAC | C-section after<br>vaginal birth |
|-------------------------------------------------|---------------------------------|----------------------------------------|------------------|------------------|-------------------|----------------------------------|
| <b>One or more sexual problem(s), n=35 710</b>  |                                 |                                        |                  |                  |                   |                                  |
| Cases (%)                                       | 8 323 (37)                      | 1 788 (37)                             | 1 278 (42)       | 718 (37)         | 194 (45)          | 1 148 (39)                       |
| Crude OR (95% CI)                               | Reference                       | 1.02 (0.96–1.09)                       | 1.24 (1.15–1.34) | 1.01 (0.92–1.11) | 1.37 (1.14–1.66)  | 1.11 (1.03–1.20)                 |
| Adjusted OR* (95% CI)                           | Reference                       | 1.01 (0.95–1.08)                       | 1.18 (1.09–1.28) | 1.00 (0.91–1.11) | 1.35 (1.11–1.64)  | 1.10 (1.01–1.19)                 |
| <b>Reduced desire, n=36 509</b>                 |                                 |                                        |                  |                  |                   |                                  |
| Cases (%)                                       | 4 981 (22)                      | 1 042 (21)                             | 723 (23)         | 437 (22)         | 106 (24)          | 656 (22)                         |
| Crude OR (95% CI)                               | Reference                       | 0.99 (0.92–1.07)                       | 1.09 (1.00–1.19) | 1.03 (0.92–1.15) | 1.13 (0.91–1.41)  | 1.03 (0.94–1.13)                 |
| Adjusted OR* (95% CI)                           | Reference                       | 0.99 (0.92–1.07)                       | 1.05 (0.96–1.15) | 1.03 (0.92–1.15) | 1.13 (0.91–1.41)  | 1.02 (0.93–1.11)                 |
| <b>Difficulty in obtaining orgasm, n=36 019</b> |                                 |                                        |                  |                  |                   |                                  |
| Cases (%)                                       | 2 861 (13)                      | 641 (13)                               | 421 (14)         | 255 (13)         | 73 (17)           | 399 (14)                         |
| Crude OR (95% CI)                               | Reference                       | 1.07 (0.97–1.17)                       | 1.10 (0.99–1.23) | 1.04 (0.91–1.20) | 1.39 (1.08–1.79)  | 1.09 (0.98–1.22)                 |
| Adjusted OR* (95% CI)                           | Reference                       | 1.06 (0.96–1.16)                       | 1.06 (0.95–1.18) | 1.04 (0.91–1.19) | 1.38 (1.07–1.78)  | 1.09 (0.97–1.22)                 |
| <b>Insufficient lubrication, n=36 148</b>       |                                 |                                        |                  |                  |                   |                                  |
| Cases (%)                                       | 1 700 (7)                       | 383 (8)                                | 344 (11)         | 138 (7)          | 46 (10)           | 298 (10)                         |
| Crude OR (95% CI)                               | Reference                       | 1.07 (0.95–1.20)                       | 1.55 (1.37–1.76) | 0.94 (0.78–1.12) | 1.44 (1.06–1.96)  | 1.39 (1.23–1.59)                 |
| Adjusted OR* (95% CI)                           | Reference                       | 1.01 (0.90–1.13)                       | 1.41 (1.24–1.60) | 0.92 (0.77–1.10) | 1.35 (0.99–1.85)  | 1.35 (1.18–1.54)                 |
| <b>Dyspareunia, n=36 266</b>                    |                                 |                                        |                  |                  |                   |                                  |
| Cases (%)                                       | 2 040 (9)                       | 446 (9)                                | 467 (15)         | 170 (9)          | 57 (13)           | 319 (11)                         |
| Crude OR (95% CI)                               | Reference                       | 1.03 (0.93–1.15)                       | 1.81 (1.62–2.02) | 0.96 (0.82–1.13) | 1.50 (1.13–1.99)  | 1.23 (1.09–1.40)                 |

**Table 2: Sexual problems by mode of birth (continued).**

|                           | Only spon-<br>taneous<br>births | Instrumental<br>vaginal<br>birth, ever | Only c-sections  | Spontaneous VBAC | Instrumental VBAC | C-section after<br>vaginal birth |
|---------------------------|---------------------------------|----------------------------------------|------------------|------------------|-------------------|----------------------------------|
| Adjusted OR* (95% CI)     | Reference                       | 1.05 (0.94–1.17)                       | 1.78 (1.59–1.99) | 0.97 (0.82–1.14) | 1.52 (1.14–2.01)  | 1.20 (1.06–1.36)                 |
| <b>Entry dyspareunia,</b> |                                 |                                        |                  |                  |                   |                                  |
| <b>n=35 720</b>           |                                 |                                        |                  |                  |                   |                                  |
| Cases (%)                 | 640 (3)                         | 160 (3)                                | 243 (8)          | 68 (4)           | 25 (6)            | 117 (4)                          |
| Crude OR (95% CI)         | Reference                       | 1.19 (1.00–1.42)                       | 2.99 (2.57–3.49) | 1.24 (0.96–1.60) | 2.09 (1.38–3.15)  | 1.43 (1.17–1.75)                 |
| Adjusted OR* (95% CI)     | Reference                       | 1.14 (0.96–1.37)                       | 2.76 (2.36–3.24) | 1.24 (0.96–1.59) | 2.03 (1.35–3.07)  | 1.41 (1.15–1.73)                 |
| <b>Deep dyspareunia,</b>  |                                 |                                        |                  |                  |                   |                                  |
| <b>n=35 720</b>           |                                 |                                        |                  |                  |                   |                                  |
| Cases (%)                 | 1 425 (6)                       | 278 (6)                                | 233 (8)          | 102 (5)          | 36 (8)            | 203 (7)                          |
| Crude OR (95% CI)         | Reference                       | 0.92 (0.80–1.05)                       | 1.24 (1.07–1.43) | 0.82 (0.67–1.01) | 1.34 (0.95–1.89)  | 1.11 (0.95–1.29)                 |
| Adjusted OR* (95% CI)     | Reference                       | 0.96 (0.84–1.09)                       | 1.25 (1.08–1.45) | 0.83 (0.67–1.02) | 1.38 (0.98–1.96)  | 1.07 (0.91–1.25)                 |

\*Adjusted for maternal age at first birth, calendar year at first birth, pre-pregnant body mass index, socio-occupational status, self-assessed health, disease, exercise in pregnancy, and smoking in pregnancy.

C-section: Caesarean section; CI: Confidence interval; OR: Odds ratio; VBAC: Vaginal birth after caesarean section.



1  
2 Among women with one or more vaginal births, 16 404 (56%), had no tear or a first degree tear  
3 (supplemental table 7). Episiotomy was frequently used in 1997 to 2002, and 6 615 women (23%)  
4 had a second degree tear from a mediolateral episiotomy as their largest tear. Anal sphincter tears  
5 were seen in 1 967 women (7%).  
6  
7  
8  
9

10 Neither second degree tears nor episiotomies were associated with increased odds of any of the  
11 studied sexual problems (table 3). Women with previous episiotomies had lower odds of deep  
12 dyspareunia (OR=0.87, 95% CI 0.77 to 0.99) than women with no tear or a first degree tear.  
13  
14

15 Women with previous anal sphincter tears had moderately higher odds of reduced lubrication and  
16 entry dyspareunia (OR 1.20, 95% CI 1.01 to 1.43, & OR 1.34, 95% CI 1.04 to 1.73, respectively).  
17  
18

19 The latter association was unaltered when frequent dyspareunia was considered (supplemental table  
20 8).  
21  
22  
23  
24  
25  
26  
27  
28  
29  
30  
31  
32  
33  
34  
35  
36  
37  
38  
39  
40  
41  
42  
43  
44  
45  
46  
47  
48  
49  
50  
51  
52  
53  
54  
55  
56  
57  
58  
59  
60

**Table 3: Sexual problems by degree of perineal tear.**

|                                                     | No tear/first degree | Second degree    | Episiotomy       | Anal sphincter tear |
|-----------------------------------------------------|----------------------|------------------|------------------|---------------------|
| <b>One or more sexual problem(s),<br/>n=27 992</b>  |                      |                  |                  |                     |
| Cases (%)                                           | 5 882 (37)           | 1 560 (38)       | 2 278 (36)       | 716 (38)            |
| Crude OR (95% CI)                                   | Reference            | 1.04 (0.97–1.12) | 0.95 (0.90–1.01) | 1.03 (0.93–1.14)    |
| Adjusted OR* (95% CI)                               | Reference            | 1.03 (0.96–1.11) | 0.95 (0.90–1.01) | 1.02 (0.92–1.12)    |
| <b>Reduced sexual desire, n=28 586</b>              |                      |                  |                  |                     |
| Cases (%)                                           | 3 523 (22)           | 935 (22)         | 1 342 (21)       | 423 (22)            |
| Crude OR (95% CI)                                   | Reference            | 1.02 (0.94–1.11) | 0.94 (0.87–1.00) | 1.01 (0.90–1.13)    |
| Adjusted OR* (95% CI)                               | Reference            | 1.01 (0.93–1.10) | 0.95 (0.88–1.01) | 1.00 (0.89–1.12)    |
| <b>Difficulty in obtaining orgasm,<br/>n=28 217</b> |                      |                  |                  |                     |
| Cases (%)                                           | 2 006 (13)           | 553 (14)         | 817 (13)         | 261 (14)            |
| Crude OR (95% CI)                                   | Reference            | 1.08 (0.97–1.19) | 1.02 (0.93–1.11) | 1.11 (0.96–1.27)    |
| Adjusted OR* (95% CI)                               | Reference            | 1.07 (0.96–1.18) | 1.01 (0.93–1.11) | 1.09 (0.95–1.25)    |
| <b>Insufficient lubrication, n=28 308</b>           |                      |                  |                  |                     |
| Cases (%)                                           | 1 133 (7)            | 314 (8)          | 481 (8)          | 163 (9)             |
| Crude OR (95% CI)                                   | Reference            | 1.08 (0.95–1.23) | 1.06 (0.95–1.19) | 1.22 (1.03–1.45)    |
| Adjusted OR* (95% CI)                               | Reference            | 1.09 (0.96–1.25) | 1.02 (0.91–1.14) | 1.20 (1.01–1.43)    |
| <b>Dyspareunia, n=28 398</b>                        |                      |                  |                  |                     |
| Cases (%)                                           | 1 469 (9)            | 372 (9)          | 562 (9)          | 184 (10)            |
| Crude OR (95% CI)                                   | Reference            | 0.98 (0.87–1.10) | 0.95 (0.86–1.05) | 1.05 (0.90–1.24)    |
| Adjusted OR* (95% CI)                               | Reference            | 0.97 (0.86–1.10) | 0.96 (0.87–1.07) | 1.07 (0.91–1.25)    |
| <b>Entry dyspareunia, n=28 006</b>                  |                      |                  |                  |                     |
| Cases (%)                                           | 453 (3)              | 115 (3)          | 201 (3)          | 74 (4)              |

1  
2  
3  
4  
5  
6  
7  
8  
9  
10  
11  
12  
13  
14  
15  
16  
17  
18  
19  
20  
21  
22  
23  
24  
25  
26  
27  
28  
29  
30  
31  
32  
33  
34  
35  
36  
37  
38  
39  
40  
41  
42  
43  
44  
45  
46

**Table 3: Sexual problems by degree of perineal tear (continued).**

|                                          | No tear/first degree | Second degree    | Episiotomy       | Anal sphincter tear |
|------------------------------------------|----------------------|------------------|------------------|---------------------|
| Crude OR (95% CI)                        | Reference            | 0.98 (0.80–1.21) | 1.11 (0.94–1.31) | 1.38 (1.08–1.78)    |
| Adjusted OR* (95% CI)                    | Reference            | 0.98 (0.79–1.20) | 1.09 (0.92–1.30) | 1.34 (1.04–1.73)    |
| <b><i>Deep dyspareunia, n=28 006</i></b> |                      |                  |                  |                     |
| Cases (%)                                | 1 035 (7)            | 265 (7)          | 355 (6)          | 117 (6)             |
| Crude OR (95% CI)                        | Reference            | 0.99 (0.86–1.14) | 0.85 (0.75–0.96) | 0.94 (0.77–1.15)    |
| Adjusted OR* (95% CI)                    | Reference            | 0.98 (0.85–1.13) | 0.87 (0.77–0.99) | 0.97 (0.80–1.19)    |

\*Adjusted for maternal age at first birth, calendar year at first birth, pre-pregnant body mass index, socio-occupational status, self-assessed health, disease, exercise in pregnancy, and smoking in pregnancy.  
CI: Confidence interval; OR: Odds ratio.

1  
2 In sensitivity analyses, adjusting for parity and year at last birth did not change the results (data not  
3 shown), and restricting the population to women who had their first birth in the Danish National  
4 Birth Cohort only changed the results marginally (supplemental tables 9 and 10). Vaginismus was  
5 rare in this study population (1%), but more prevalent in women who had a history of caesarean  
6 section. However, results were not substantially altered when we excluded women with vaginismus  
7 (supplemental table 11).  
8  
9  
10  
11  
12

## 13 14 **DISCUSSION**

15 In this large sample of Danish mothers, a history of caesarean section was associated with an  
16 increased risk of sexual problems in midlife compared with women who had only birthed vaginally.  
17 The estimated effect sizes were small to moderate, but if causative would be clinically important.  
18 For example, women who had only given birth by caesarean section had a relative risk of 1.11 of  
19 sexual problems in later life. This 11 percent proportional increase amounts to a five percentage  
20 points absolute increase from 37 to 42 percent. In contrast, instrumental vaginal birth was not  
21 associated with long-term sexual problems. Among women who had delivered by caesarean but had  
22 a subsequent spontaneous vaginal birth, the risk of long-term sexual problems was similar to those  
23 who had only birthed vaginally.  
24  
25  
26  
27  
28  
29  
30  
31  
32

33 Strengths of this study include study size, and long-term follow-up with linkage to registry data,  
34 allowing a detailed investigation of exposures while limiting the risk of differential  
35 misclassification. Limitations include a participation rate of 53%. A recent study found that  
36 participants in the maternal follow-up were older, and of higher socio-occupational status and  
37 healthier lifestyle than non-participants, but also that selected exposure-outcome associations were  
38 not substantially affected by selection bias.<sup>16</sup> However, the relatively high socio-occupational level  
39 of participants could affect generalisability. Residual confounding, including confounding by time-  
40 varying factors and confounding by indication, should be considered. A study found lower  
41 prevalence of vaginal births in women with vaginismus.<sup>24</sup> It is possible that some of the  
42 biopsychological mechanisms that cause sexual problems may also alter the likelihood of vaginal  
43 birth. Among these mechanisms could be mental or somatic illness, which we adjusted for in our  
44 analysis, but also vaginismus prior to childbirth, for which we did not have information. This could  
45 draw the results towards an association between caesarean section and more sexual problems.  
46 However, caesarean section on maternal request was rare in Denmark in the 1990s and 2000s – less  
47 than 2% of all births.<sup>25</sup> Results were unchanged when we only considered women who had their  
48 first birth in the Danish National Birth Cohort. Finally, chance findings cannot be ruled out.  
49  
50  
51  
52  
53  
54  
55  
56  
57  
58  
59  
60

1  
2  
3  
4 The prevalence of sexual problems in midlife in the present study is broadly within the range from  
5 previous reports. In this study, as in previous studies,<sup>10,12</sup> episiotomies were not associated with  
6 more sexual problems. Rather, women with episiotomies reported less deep dyspareunia than  
7 women with no tears or first degree tears. Shorter second stages of labour are observed when  
8 episiotomy is used,<sup>5</sup> which might explain why these women have less deep dyspareunia. However,  
9 at present our results do not justify a change in the advice on avoiding routine use of episiotomy.<sup>26</sup>  
10 Some previous studies found no association between anal sphincter tears and long-term sexual  
11 problems,<sup>9,12</sup> whereas others found increased risk of dyspareunia<sup>11</sup> or reduced lubrication<sup>10</sup> as we  
12 did. Scar tissue and a higher prevalence of incontinence might explain this finding, but the  
13 underlying reasons for the tear could also play a role.  
14  
15  
16  
17  
18  
19  
20  
21  
22

23 Previous studies of long-term sexual health between different modes of birth were small.<sup>10,12</sup> The  
24 studies were carried out in the USA and in Switzerland, countries with different obstetric traditions  
25 from Denmark, and neither found indication that caesarean section protected against sexual  
26 problems in the long term.<sup>10,12</sup> If the association between caesarean sections and sexual problems  
27 identified in this study is causal, there are a number of possible underlying mechanisms. Abdominal  
28 adhesions after caesarean section are not likely to be the whole explanation, since this would not  
29 explain why women who had delivered by caesarean section also reported more entry dyspareunia,  
30 nor why vaginal birth after caesarean section reduces sexual problems. It is possible that expectation  
31 of deep dyspareunia can reduce lubrication and heighten the risk of entry dyspareunia. Another  
32 explanation could be that the achievement of at least one vaginal birth is protective against sexual  
33 problems in later life. This might be a physical effect if, contrary to anecdote, changes to the  
34 perineum after vaginal birth are in some way associated with less pain or greater pleasure. There  
35 may also be psychosexual benefits from achieving a vaginal birth.  
36  
37  
38  
39  
40  
41  
42  
43  
44  
45  
46

47 Caesarean section has been proposed as preventive of pelvic floor dysfunctions, such as pelvic  
48 organ prolapse, and urinary and anal incontinence.<sup>8</sup> The experience of pelvic floor dysfunctions  
49 may in turn influence sexual health.<sup>3</sup> Therefore pelvic floor dysfunctions can be considered as  
50 intermediate factors between mode of birth and sexual health (see supplemental figure 1). For this  
51 reason, we did not adjust for pelvic floor dysfunctions in the analyses. Yet, when discussing long-  
52 term effects of mode of birth, knowledge about pelvic floor dysfunctions is important. Caesarean  
53 section appears to protect against pelvic organ prolapse in both the short and long term.<sup>8</sup> For  
54 urinary incontinence, there appears to be a protective effect of caesarean section in the short term.  
55  
56  
57  
58  
59  
60

1  
2 However, as women age, this potential effect is no longer found.<sup>8</sup> The current evidence does not  
3 support any protective effect of caesarean section on anal incontinence outside the immediate post-  
4 partum period.<sup>8</sup> These factors should all be taken into account, along with sexual health, when  
5 counselling a woman about the choice of mode of birth.  
6  
7  
8  
9

10 Our findings do not support choosing caesarean section over vaginal birth in order to prevent long-  
11 term sexual problems. Instead, vaginal birth appears to be associated with fewer sexual problems,  
12 even when it involves instrumental birth, or an episiotomy.  
13  
14  
15  
16

## 17 **CONTRIBUTOR AND GUARANTOR INFORMATION**

18 All authors contributed to the design of the study. JO and EAN were responsible for the data  
19 collection. SH analysed the data with help from HK. SH, HK, EAN, JGT, and JO interpreted the  
20 results. SH wrote the first draft of the manuscript, and EAN, HK, JGT, and JO critically revised it.  
21 All authors approved the final manuscript. All authors are guarantors.  
22  
23  
24  
25  
26  
27

## 28 **LICENCE FOR PUBLICATION**

29 The Corresponding Author has the right to grant on behalf of all authors and does grant on behalf of  
30 all authors, a worldwide licence to the Publishers and its licensees in perpetuity, in all forms,  
31 formats and media (whether known now or created in the future), to i) publish, reproduce,  
32 distribute, display and store the Contribution, ii) translate the Contribution into other languages,  
33 create adaptations, reprints, include within collections and create summaries, extracts and/or,  
34 abstracts of the Contribution, iii) create any other derivative work(s) based on the Contribution, iv)  
35 to exploit all subsidiary rights in the Contribution, v) the inclusion of electronic links from the  
36 Contribution to third party material where-ever it may be located; and, vi) licence any third party to  
37 do any or all of the above.  
38  
39  
40  
41  
42  
43  
44  
45  
46

## 47 **DATA SHARING**

48 The data that support the findings of this study are available from the Danish National Birth Cohort  
49 but restrictions apply to the availability of these data, which were used under license for the current  
50 study, and so are not publicly available. All requests for data from the Danish National Birth Cohort  
51 must include a short protocol with a specific research question and a plan for analysis. More  
52 information can be found on [www.dnbc.dk](http://www.dnbc.dk).  
53  
54  
55  
56  
57

## 58 **TRANSPARENCY**

1  
2 The authors affirm that this manuscript is an honest, accurate, and transparent account of the study  
3 being reported; that no important aspects of the study have been omitted; and that any discrepancies  
4 from the study as planned (and, if relevant, registered) have been explained.  
5  
6  
7

## 8 **COMPETING INTERESTS**

9  
10 All authors have completed the ICMJE uniform disclosure form at  
11 [www.icmje.org/coi\\_disclosure.pdf](http://www.icmje.org/coi_disclosure.pdf) and declare: no support from any organization for the submitted  
12 work; no financial relationships with any organizations that might have an interest in the submitted  
13 work in the previous three years; no other relationships or activities that could appear to have  
14 influenced the submitted work.  
15  
16  
17  
18

## 19 **ROLE OF FUNDING SOURCE**

20  
21 The Danish National Birth Cohort was established with a significant grant from the Danish National  
22 Research Foundation. Additional support was obtained from the Danish Regional Committees, the  
23 Pharmacy Foundation, the Egmont Foundation, the March of Dimes Birth Defects Foundation, the  
24 Health Foundation and other minor grants. The Danish Council for Independent Research supported  
25 the maternal follow-up.  
26  
27  
28  
29  
30

31  
32 The funders of the Danish National Birth Cohort and the maternal follow-up had no role in study  
33 design, data collection, data analysis, data interpretation, or writing of the report. SH and HK had  
34 full access to all the data in the study, and all authors had final responsibility for the decision to  
35 submit for publication.  
36  
37  
38  
39  
40

## 41 **ACKNOWLEDGEMENTS**

42  
43 The authors would like to thank all women who participated in the maternal follow-up.  
44  
45  
46

## 47 **REFERENCES**

- 48  
49 1 WHO. WHO | Reproductive health [Internet]. WHO. 2017 [cited 2017 Sep 10]. Available  
50 from: [http://www.who.int/topics/reproductive\\_health/en/](http://www.who.int/topics/reproductive_health/en/)  
51  
52  
53 2 Flynn KE, Lin L, Bruner DW, Cyranowski JM, Hahn EA, Jeffery DD, et al. Sexual  
54 Satisfaction and the Importance of Sexual Health to Quality of Life Throughout the Life  
55 Course of U.S. Adults. *J Sex Med.* 2016;13(11):1642–50.  
56  
57  
58  
59  
60

- 1  
2 3 Srivastava R, Thakar R, Sultan A. Female Sexual Dysfunction in Obstetrics and  
3 Gynecology. *Obstet Gynecol Surv.* 2008;63(8):527–37.  
4  
5  
6 4 Hicks TL, Goodall SF, Quattrone EM, Lydon-Rochelle MT. Postpartum sexual functioning  
7 and method of delivery: summary of the evidence. *J Midwifery Womens Health.*  
8 2004;49(5):430–36.  
9  
10  
11 5 Ejegård H, Ryding EL, Sjogren B. Sexuality after delivery with episiotomy: a long-term  
12 follow-up. *Gynecol Obstet Invest.* 2008;66(1):1–7.  
13  
14  
15 6 McDonald EA, Gartland D, Small R, Brown SJ. Dyspareunia and childbirth: a prospective  
16 cohort study. *BJOG Int J Obstet Gynaecol.* 2015;122(5):672–79.  
17  
18  
19 7 Hannah ME, Whyte H, Hannah WJ, Hewson S, Amankwah K, Cheng M, et al. Maternal  
20 outcomes at 2 years after planned cesarean section versus planned vaginal birth for breech  
21 presentation at term: The international randomized Term Breech Trial. *Am J Obstet Gynecol.*  
22 2004;191(3):917–27.  
23  
24  
25 8 Sandall J, Tribe RM, Avery L, Mola G, Visser GH, Homer CS, et al. Short-term and long-  
26 term effects of caesarean section on the health of women and children. *Lancet.*  
27 2018;392(10155):1349–57.  
28  
29  
30 9 Fornell EU, Matthiesen L, Sjö Dahl R, Berg G. Obstetric anal sphincter injury ten years after:  
31 subjective and objective long term effects. *BJOG Int J Obstet Gynaecol.* 2005;112(3):312–  
32 16.  
33  
34  
35 10 Otero M, Boulvain M, Bianchi-Demicheli F, Floris LA, Sangalli MR, Weil A, et al.  
36 Women’s health 18 years after rupture of the anal sphincter during childbirth: II. Urinary  
37 incontinence, sexual function, and physical and mental health. *Am J Obstet Gynecol.*  
38 2006;194(5):1260–65.  
39  
40  
41 11 Mous M, Muller SA, de Leeuw JW. Long-term effects of anal sphincter rupture during  
42 vaginal delivery: faecal incontinence and sexual complaints. *BJOG Int J Obstet Gynaecol.*  
43 2008;115(2):234–38.  
44  
45  
46 12 Fehniger JE, Brown JS, Creasman JM, Van Den Eeden SK, Thom DH, Subak LL, et al.  
47 Childbirth and female sexual function later in life. *Obstet Gynecol.* 2013;122(5):988–97.  
48  
49  
50  
51  
52  
53  
54  
55  
56  
57  
58  
59  
60



- 1  
2 13 Olsen J, Melbye M, Olsen SF, Sørensen TI, Aaby P, Andersen AM, et al. The Danish  
3 National Birth Cohort--its background, structure and aim. *Scand J Public Health*.  
4 200;29(4):300–07.  
5  
6  
7 14 Statens Serum Institut. About the DNBC - Statens Serum Institut [Internet]. 2015 [cited  
8 2017 Mar 3]. Available from: <http://www.ssi.dk/English/RandD/Research>  
9 <http://www.ssi.dk/English/RandD/Research>  
10 <http://www.ssi.dk/English/RandD/Research>  
11 <http://www.ssi.dk/English/RandD/Research>  
12 <http://www.ssi.dk/English/RandD/Research>  
13 <http://www.ssi.dk/English/RandD/Research>  
14 <http://www.ssi.dk/English/RandD/Research>  
15 <http://www.ssi.dk/English/RandD/Research>  
16 <http://www.ssi.dk/English/RandD/Research>  
17 <http://www.ssi.dk/English/RandD/Research>  
18 <http://www.ssi.dk/English/RandD/Research>  
19 <http://www.ssi.dk/English/RandD/Research>  
20 <http://www.ssi.dk/English/RandD/Research>  
21 <http://www.ssi.dk/English/RandD/Research>  
22 <http://www.ssi.dk/English/RandD/Research>  
23 <http://www.ssi.dk/English/RandD/Research>  
24 <http://www.ssi.dk/English/RandD/Research>  
25 <http://www.ssi.dk/English/RandD/Research>  
26 <http://www.ssi.dk/English/RandD/Research>  
27 <http://www.ssi.dk/English/RandD/Research>  
28 <http://www.ssi.dk/English/RandD/Research>  
29 <http://www.ssi.dk/English/RandD/Research>  
30 <http://www.ssi.dk/English/RandD/Research>  
31 <http://www.ssi.dk/English/RandD/Research>  
32 <http://www.ssi.dk/English/RandD/Research>  
33 <http://www.ssi.dk/English/RandD/Research>  
34 <http://www.ssi.dk/English/RandD/Research>  
35 <http://www.ssi.dk/English/RandD/Research>  
36 <http://www.ssi.dk/English/RandD/Research>  
37 <http://www.ssi.dk/English/RandD/Research>  
38 <http://www.ssi.dk/English/RandD/Research>  
39 <http://www.ssi.dk/English/RandD/Research>  
40 <http://www.ssi.dk/English/RandD/Research>  
41 <http://www.ssi.dk/English/RandD/Research>  
42 <http://www.ssi.dk/English/RandD/Research>  
43 <http://www.ssi.dk/English/RandD/Research>  
44 <http://www.ssi.dk/English/RandD/Research>  
45 <http://www.ssi.dk/English/RandD/Research>  
46 <http://www.ssi.dk/English/RandD/Research>  
47 <http://www.ssi.dk/English/RandD/Research>  
48 <http://www.ssi.dk/English/RandD/Research>  
49 <http://www.ssi.dk/English/RandD/Research>  
50 <http://www.ssi.dk/English/RandD/Research>  
51 <http://www.ssi.dk/English/RandD/Research>  
52 <http://www.ssi.dk/English/RandD/Research>  
53 <http://www.ssi.dk/English/RandD/Research>  
54 <http://www.ssi.dk/English/RandD/Research>  
55 <http://www.ssi.dk/English/RandD/Research>  
56 <http://www.ssi.dk/English/RandD/Research>  
57 <http://www.ssi.dk/English/RandD/Research>  
58 <http://www.ssi.dk/English/RandD/Research>  
59 <http://www.ssi.dk/English/RandD/Research>  
60 <http://www.ssi.dk/English/RandD/Research>
- 13 Olsen J, Melbye M, Olsen SF, Sørensen TI, Aaby P, Andersen AM, et al. The Danish National Birth Cohort--its background, structure and aim. *Scand J Public Health*. 200;29(4):300–07.
- 14 Statens Serum Institut. About the DNBC - Statens Serum Institut [Internet]. 2015 [cited 2017 Mar 3]. Available from: <http://www.ssi.dk/English/RandD/Research>
- 15 Nohr EA, Frydenberg M, Henriksen TB, Olsen J. Does Low Participation in Cohort Studies Induce Bias? *Epidemiology*. 2006;17(4):413–18.
- 16 Bliddal M, Liew Z, Pottegård A, Kirkegaard H, Olsen J, Nohr EA. Examining Non-Participation to the Maternal Follow-up Within the Danish National Birth Cohort. *Am J Epidemiol*. 2018 Jan 16.
- 17 Ministeriet for Sundhed og Forebyggelse. Lov om videnskabsetisk behandling af sundhedsvidenskabelige forskningsprojekter [Internet]. LOV nr 593 Jun 14, 2011 [cited 2017 Jan 3]. Available from: <https://www.retsinformation.dk/Forms/R0710.aspx?id=137674>
- 18 Christensen AI, Jensen HAR, Ekholm O, Davidsen M, Juel K. Seksuel sundhed. Resultater fra Sundheds- og sygelighedsundersøgelsen 2013. Denmark: *Statens Institut for Folkesundhed, SDU*; 2016.
- 19 Knudsen LB, Olsen J. The Danish Medical Birth Registry. *Dan Med Bull*. 1998;45(3):320–23.
- 20 Thygesen LC, Daasnes C, Thaulow I, Brønnum-Hansen H. Introduction to Danish (nationwide) registers on health and social issues: Structure, access, legislation, and archiving. *Scand J Public Health*. 2011;39(7\_suppl):12–16.
- 21 Glymour MM, Greenland S. Causal Diagrams. In: *Modern epidemiology*. Third edition. Philadelphia Baltimore New York London Buenos Aires Hong Kong Sydney Tokyo: *Wolters Kluwer Health, Lippincott Williams & Wilkins*; 2008. p. 183–209.
- 22 Nohr EA, Bech BH, Davies MJ, Frydenberg M, Henriksen TB, Olsen J. Prepregnancy Obesity and Fetal Death: A Study Within the Danish National Birth Cohort. *Obstet Gynecol*. 2005;106(2):250–59.

- 1  
2 23 Sterne JAC, White IR, Carlin JB, Spratt M, Royston P, Kenward MG, et al. Multiple  
3 imputation for missing data in epidemiological and clinical research: potential and  
4 pitfalls. *BMJ*. 2009;338:b2393.  
5  
6  
7 24 Möller L, Josefsson A, Bladh M, Lilliecreutz C, Sydsjö G. Reproduction and mode of  
8 delivery in women with vaginismus or localised provoked vestibulodynia: a Swedish  
9 register-based study. *BJOG Int J Obstet Gynaecol*. 2015;122(3):329–34.  
10  
11  
12 25 Forsthalm MM, Lidegaard O. [Cesarean section on maternal request]. *Ugeskr Laeger*. 2009;  
13 171(7):497–502.  
14  
15  
16 26 Jiang H, Qian X, Carroli G, Garner P. Selective versus routine use of episiotomy for vaginal  
17 birth. In: The Cochrane Collaboration, editor. *Cochrane Database of Systematic Reviews*  
18 [Internet]. Chichester, UK: *John Wiley & Sons, Ltd*; 2017 [cited 2017 Apr 27]. Available  
19 from: <http://doi.wiley.com/10.1002/14651858.CD000081.pub3>  
20  
21  
22  
23  
24  
25  
26  
27  
28  
29

## 30 **FIGURE LEGEND**

31  
32 Figure 1: Flow chart of the study population.  
33  
34  
35  
36  
37  
38  
39  
40  
41  
42  
43  
44  
45  
46  
47  
48  
49  
50  
51  
52  
53  
54  
55  
56  
57  
58  
59  
60

1  
2  
3  
4  
5  
6  
7  
8  
9  
10  
11  
12  
13  
14  
15  
16  
17  
18  
19  
20  
21  
22  
23  
24  
25  
26  
27  
28  
29  
30  
31  
32  
33  
34  
35  
36  
37  
38  
39  
40  
41  
42  
43  
44  
45  
46  
47  
48  
49  
50  
51  
52  
53  
54  
55  
56  
57  
58  
59  
60

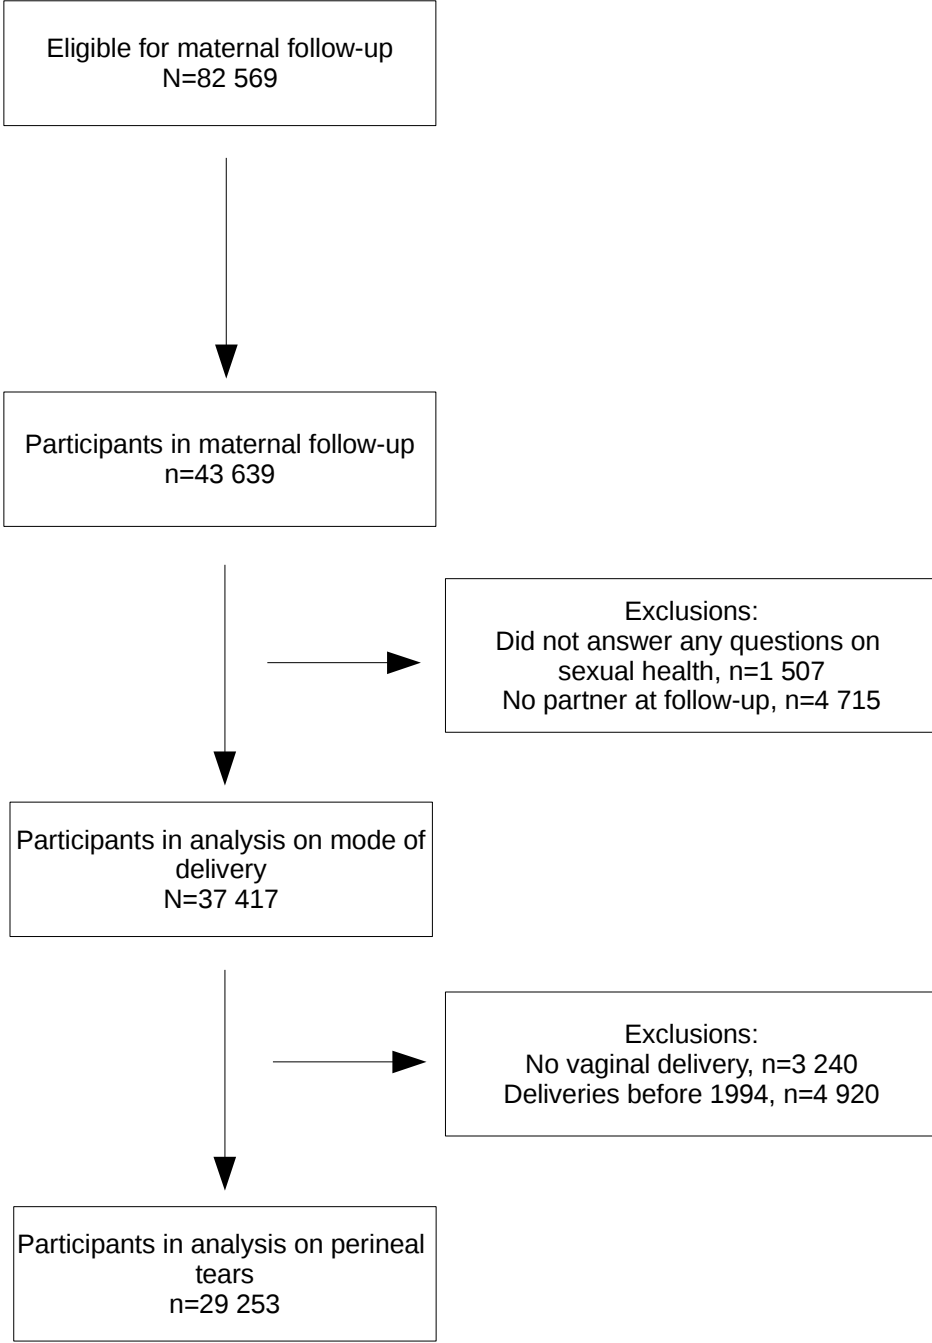

## Mode of birth and long term sexual health: a follow-up study of mothers in the Danish National Birth Cohort

Sarah Hjorth, Helene Kirkegaard, Jørn Olsen, Jim G Thornton, Ellen A Nohr

### Supplemental material

The supplementary material contains:

Supplemental table 1: Sexual health in the past year (2012-2013) in mothers in their mid-forties (N=37 147).

Supplemental table 2: Sexual problems by degree of perineal tear, 3<sup>rd</sup> and 4<sup>th</sup> degree tears analysed separately.

Supplemental table 3: Sexual problems by mode of birth in participants with complete data.

Supplemental table 4: Sexual problems by degree of perineal tear in participants with complete data.

Supplemental table 5: Exposures in participants and non-participants.

Supplemental table 6: Frequent dyspareunia by mode of birth.

Supplemental table 7: Participant characteristics by degree of perineal tear.

Supplemental table 8: Frequent dyspareunia by degree of perineal tear.

Supplemental table 9: Sexual problems by mode of birth in women who had their first birth in the DNBC.

Supplemental table 10: Sexual problems by degree of perineal tear in women who had their first birth in the DNBC.

Supplemental table 11: Sexual problems by mode of birth in participants without vaginismus.

Supplemental figure 1: Directed acyclic graph.

**Supplemental table 1: Sexual health in the past year (2012-2013) in mothers in their mid-forties (N=42 132).**

|                                                                                               | Women with a partner,<br>N=37 417 |       | Women without a<br>partner, N=4 715 |       |
|-----------------------------------------------------------------------------------------------|-----------------------------------|-------|-------------------------------------|-------|
| <b>Have your sexual needs been met?, n (%)*</b>                                               |                                   |       |                                     |       |
| Completely                                                                                    | 15 081                            | (41)  | 417                                 | (9)   |
| Almost completely                                                                             | 10 208                            | (29)  | 537                                 | (12)  |
| Partially                                                                                     | 6 666                             | (18)  | 1 067                               | (23)  |
| A little                                                                                      | 2 248                             | (6)   | 918                                 | (20)  |
| Not at all                                                                                    | 1 090                             | (3)   | 1 214                               | (27)  |
| I have not had sexual needs                                                                   | 1 108                             | (3)   | 362                                 | (8)   |
| I do not know                                                                                 | 290                               | (1)   | 52                                  | (1)   |
| <b>How often have you been sexually active with another person?, n (%)*</b>                   |                                   |       |                                     |       |
| Every day                                                                                     | 89                                | (0.2) | 6                                   | (0.1) |
| 3–6 times a week                                                                              | 3 432                             | (9)   | 185                                 | (4)   |
| 1–2 times a week                                                                              | 13 640                            | (37)  | 553                                 | (12)  |
| 1–3 times a month                                                                             | 12 671                            | (35)  | 885                                 | (20)  |
| Less than once a month                                                                        | 4 960                             | (14)  | 1 177                               | (26)  |
| Not at all                                                                                    | 1 327                             | (4)   | 1 600                               | (35)  |
| I do not know                                                                                 | 348                               | (1)   | 122                                 | (3)   |
| <b>Have you experienced lacking or reduced sexual desire?, n (%)*</b>                         |                                   |       |                                     |       |
| Yes, all the time                                                                             | 1 551                             | (4)   | 234                                 | (5)   |
| Yes, often                                                                                    | 7 551                             | (21)  | 505                                 | (11)  |
| Yes, sometimes                                                                                | 13 566                            | (37)  | 755                                 | (17)  |
| Yes, but rarely                                                                               | 9 084                             | (25)  | 764                                 | (17)  |
| No, never                                                                                     | 4 612                             | (13)  | 1 681                               | (37)  |
| I do not know                                                                                 | 376                               | (1)   | 608                                 | (13)  |
| <b><i>If yes, was it a problem for you?</i></b>                                               |                                   |       |                                     |       |
| Yes                                                                                           | 7 945                             | (35)  | 287                                 | (19)  |
| No                                                                                            | 12 220                            | (55)  | 1 077                               | (73)  |
| I do not know                                                                                 | 2 275                             | (10)  | 119                                 | (8)   |
| <b><i>Was it a problem for your partner?</i></b>                                              |                                   |       |                                     |       |
| Yes                                                                                           | 12 752                            | (61)  | -                                   |       |
| No                                                                                            | 4 465                             | (21)  | -                                   |       |
| I do not know                                                                                 | 3 740                             | (18)  | -                                   |       |
| <b>Have you experienced the following during sexual activity with another person?, n (%)*</b> |                                   |       |                                     |       |

**Supplemental table 1: Sexual health in the past year (2012-2013) in mothers in their mid-forties (N=37 147) (continued).**

|                                                                       | Women with a partner,<br>N=37 417 |        | Women without a<br>partner, N=4 715 |        |
|-----------------------------------------------------------------------|-----------------------------------|--------|-------------------------------------|--------|
| <b>I have not been sufficiently wet in the vagina</b>                 |                                   |        |                                     |        |
| Not at all                                                            | 18 242                            | (51)   | 2 468                               | (57)   |
| Rarely                                                                | 8 272                             | (23)   | 572                                 | (13)   |
| Sometimes                                                             | 5 938                             | (16)   | 337                                 | (8)    |
| Often                                                                 | 2 024                             | (6)    | 126                                 | (3)    |
| Every time                                                            | 885                               | (2)    | 62                                  | (1)    |
| I do not know                                                         | 787                               | (2)    | 770                                 | (18)   |
| <b>I have not, or only with great difficulty, achieved orgasm</b>     |                                   |        |                                     |        |
| Not at all                                                            | 13 119                            | (36)   | 1 566                               | (36)   |
| Rarely                                                                | 10 580                            | (29)   | 854                                 | (20)   |
| Sometimes                                                             | 6 853                             | (19)   | 632                                 | (15)   |
| Often                                                                 | 2 943                             | (8)    | 324                                 | (8)    |
| Every time                                                            | 1 707                             | (5)    | 208                                 | (5)    |
| I do not know                                                         | 817                               | (2)    | 730                                 | (17)   |
| <b>I have had vaginismus that prevented intercourse</b>               |                                   |        |                                     |        |
| Not at all                                                            | 34 601                            | (95)   | 3 557                               | (82)   |
| Rarely                                                                | 638                               | (2)    | 58                                  | (1)    |
| Sometimes                                                             | 269                               | (1)    | 17                                  | (0.4)  |
| Often                                                                 | 87                                | (0.2)  | <5                                  | (<0.1) |
| Every time                                                            | 16                                | (<0.1) | 0                                   | (0)    |
| I do not know                                                         | 647                               | (2)    | 701                                 | (16)   |
| <b>I have had pain in my genitals and/or abdomen with intercourse</b> |                                   |        |                                     |        |
| Not at all                                                            | 26 965                            | (74)   | 3 019                               | (70)   |
| Rarely                                                                | 5 256                             | (14)   | 338                                 | (8)    |
| Sometimes                                                             | 2 704                             | (7)    | 185                                 | (4)    |
| Often                                                                 | 584                               | (2)    | 48                                  | (1)    |
| Every time                                                            | 211                               | (1)    | 23                                  | (1)    |
| I do not know                                                         | 546                               | (2)    | 720                                 | (17)   |
| <b>If yes, where was the pain located?†</b>                           |                                   |        |                                     |        |
| At the vaginal entrance                                               | 1 253                             | (36)   | 71                                  | (28)   |
| Deep in the abdomen                                                   | 2 277                             | (65)   | 197                                 | (77)   |
| I do not know                                                         | 228                               | (7)    | 14                                  | (5)    |

\*Percentage of those who have answered the question. The number of answers available for analysis for each outcome differed, as the response option 'I do not wish to answer this question' was provided for questions on sexual health and varied for all questions between 210 and 1361. In general, women without a partner more often used this answer category. The number of missing values were between 0 and 37 for all questions except 'was it a problem for your partner?' with 1503 missing values. The proportion of missing values did not differ between women with and without a partner.

†More than one answer could be given, wherefore the percentage adds up to more than 100.

**Supplemental table 2: Sexual problems by degree of perineal tear, 3<sup>rd</sup> and 4<sup>th</sup> degree tears analysed separately.**

|                                                 | No tear/first degree | Second degree    | Episiotomy       | Third degree     | Fourth degree    |
|-------------------------------------------------|----------------------|------------------|------------------|------------------|------------------|
| <b>One or more sexual problem(s), n=27 992</b>  |                      |                  |                  |                  |                  |
| Cases (%)                                       | 5 882 (37)           | 1 560 (38)       | 2 278 (36)       | 617 (38)         | 99 (42)          |
| Crude OR (95% CI)                               | Reference            | 1.04 (0.97–1.12) | 0.95 (0.90–1.01) | 1.01 (0.91–1.12) | 1.19 (0.92–1.55) |
| Adjusted OR* (95% CI)                           | Reference            | 1.03 (0.96–1.11) | 0.95 (0.90–1.01) | 1.00 (0.90–1.11) | 1.17 (0.90–1.52) |
| <b>Reduced sexual desire, n=28 586</b>          |                      |                  |                  |                  |                  |
| Cases (%)                                       | 3 523 (22)           | 935 (22)         | 1 342 (21)       | 369 (22)         | 54 (22)          |
| Crude OR (95% CI)                               | Reference            | 1.02 (0.94–1.11) | 0.94 (0.87–1.00) | 1.01 (0.89–1.14) | 1.00 (0.74–1.36) |
| Adjusted OR* (95% CI)                           | Reference            | 1.01 (0.93–1.10) | 0.95 (0.88–1.01) | 1.00 (0.88–1.13) | 0.99 (0.73–1.34) |
| <b>Difficulty in obtaining orgasm, n=28 217</b> |                      |                  |                  |                  |                  |
| Cases (%)                                       | 2 006 (13)           | 553 (13)         | 817 (13)         | 232 (14)         | 29 (12)          |
| Crude OR (95% CI)                               | Reference            | 1.08 (0.97–1.19) | 1.02 (0.93–1.11) | 1.13 (0.98–1.31) | 0.94 (0.64–1.39) |
| Adjusted OR* (95% CI)                           | Reference            | 1.07 (0.96–1.18) | 1.01 (0.93–1.11) | 1.12 (0.96–1.29) | 0.92 (0.62–1.36) |
| <b>Insufficient lubrication, n=28 308</b>       |                      |                  |                  |                  |                  |
| Cases (%)                                       | 1 133 (7)            | 314 (8)          | 481 (8)          | 139 (8)          | 24 (10)          |
| Crude OR (95% CI)                               | Reference            | 1.08 (0.95–1.23) | 1.06 (0.95–1.19) | 1.19 (0.99–1.43) | 1.43 (0.93–2.19) |
| Adjusted OR* (95% CI)                           | Reference            | 1.09 (0.96–1.25) | 1.02 (0.91–1.14) | 1.17 (0.97–1.41) | 1.42 (0.93–1.19) |
| <b>Dyspareunia, n=28 398</b>                    |                      |                  |                  |                  |                  |
| Cases (%)                                       | 1 469 (9)            | 372 (9)          | 562 (9)          | 158 (10)         | 26 (11)          |
| Crude OR (95% CI)                               | Reference            | 0.98 (0.87–1.10) | 0.95 (0.86–1.05) | 1.04 (0.87–1.23) | 1.18 (0.78–1.77) |
| Adjusted OR* (95% CI)                           | Reference            | 0.97 (0.86–1.10) | 0.96 (0.87–1.07) | 1.05 (0.88–1.25) | 1.17 (0.77–1.77) |
| <b>Entry dyspareunia, n=28 006</b>              |                      |                  |                  |                  |                  |
| Cases (%)                                       | 453 (3)              | 115 (3)          | 201 (3)          | 62 (4)           | 12 (5)           |
| Crude OR (95% CI)                               | Reference            | 0.98 (0.80–1.21) | 1.11 (0.94–1.31) | 1.33 (1.01–1.74) | 1.77 (0.98–3.19) |
| Adjusted OR* (95% CI)                           | Reference            | 0.98 (0.79–1.20) | 1.09 (0.92–1.30) | 1.29 (0.98–1.69) | 1.74 (0.97–3.15) |
| <b>Deep dyspareunia, n=28 006</b>               |                      |                  |                  |                  |                  |
| Cases (%)                                       | 1 035 (7)            | 265 (7)          | 355 (6)          | 103 (6)          | 14 (6)           |
| Crude OR (95% CI)                               | Reference            | 0.99 (0.86–1.14) | 0.85 (0.75–0.96) | 0.95 (0.77–1.18) | 0.88 (0.51–1.51) |
| Adjusted OR* (95% CI)                           | Reference            | 0.98 (0.85–1.13) | 0.87 (0.77–0.99) | 0.99 (0.80–1.22) | 0.88 (0.51–1.51) |

\*Adjusted for maternal age at first birth, calendar year at first birth, pre-pregnant body mass index, socio-occupational status, self-assessed health, disease, exercise in pregnancy, and smoking in pregnancy.

CI: Confidence interval; OR: Odds ratio.

**Supplemental table 3: Sexual problems by mode of birth in participants with complete data.**

|                                                 | Only spontaneous births | Instrumental vaginal birth, ever | Only c-sections  | Spontaneous VBAC | Instrumental VBAC | C-section after vaginal birth |
|-------------------------------------------------|-------------------------|----------------------------------|------------------|------------------|-------------------|-------------------------------|
| <b>One or more sexual problem(s), n=32 638</b>  |                         |                                  |                  |                  |                   |                               |
| Cases (%)                                       | 7 615 (37)              | 1 643 (38)                       | 1 144 (42)       | 651 (37)         | 177 (44)          | 1 043 (39)                    |
| Crude OR (95% CI)                               | Reference               | 1.03 (0.96–1.10)                 | 1.21 (1.12–1.32) | 1.00 (0.90–1.10) | 1.34 (1.10–1.64)  | 1.10 (1.01–1.20)              |
| Adjusted OR* (95% CI)                           | Reference               | 1.02 (0.95–1.09)                 | 1.16 (1.07–1.26) | 1.00 (0.90–1.10) | 1.34 (1.10–1.64)  | 1.09 (1.00–1.18)              |
| <b>Reduced desire, n=33 360</b>                 |                         |                                  |                  |                  |                   |                               |
| Cases (%)                                       | 4 547 (22)              | 956 (21)                         | 644 (23)         | 395 (22)         | 100 (24)          | 602 (22)                      |
| Crude OR (95% CI)                               | Reference               | 0.99 (0.92–1.07)                 | 1.07 (0.97–1.17) | 1.02 (0.91–1.14) | 1.17 (0.93–1.47)  | 1.03 (0.94–1.14)              |
| Adjusted OR* (95% CI)                           | Reference               | 0.99 (0.92–1.07)                 | 1.03 (0.94–1.13) | 1.02 (0.91–1.14) | 1.17 (0.93–1.47)  | 1.02 (0.93–1.13)              |
| <b>Difficulty in obtaining orgasm, n=32 915</b> |                         |                                  |                  |                  |                   |                               |
| Cases (%)                                       | 2 621 (13)              | 590 (13)                         | 377 (14)         | 233 (13)         | 69 (17)           | 361 (13)                      |
| Crude OR (95% CI)                               | Reference               | 1.07 (0.97–1.18)                 | 1.08 (0.96–1.22) | 1.04 (0.90–1.20) | 1.43 (1.10–1.85)  | 1.08 (0.96–1.21)              |
| Adjusted OR* (95% CI)                           | Reference               | 1.06 (0.96–1.16)                 | 1.03 (0.92–1.16) | 1.04 (0.90–1.20) | 1.42 (1.09–1.84)  | 1.07 (0.95–1.21)              |
| <b>Insufficient lubrication, n=33 033</b>       |                         |                                  |                  |                  |                   |                               |
| Cases (%)                                       | 1 551 (7)               | 351 (8)                          | 310 (11)         | 126 (7)          | 39 (10)           | 272 (10)                      |
| Crude OR (95% CI)                               | Reference               | 1.07 (0.95–1.21)                 | 1.55 (1.36–1.76) | 0.94 (0.79–1.13) | 1.31 (0.94–1.83)  | 1.40 (1.22–1.60)              |
| Adjusted OR* (95% CI)                           | Reference               | 1.00 (0.89–1.13)                 | 1.40 (1.23–1.60) | 0.95 (0.79–1.14) | 1.23 (0.88–1.72)  | 1.35 (1.18–1.55)              |
| <b>Dyspareunia, n=33 140</b>                    |                         |                                  |                  |                  |                   |                               |
| Cases (%)                                       | 1 858 (9)               | 407 (9)                          | 417 (15)         | 164 (9)          | 48 (12)           | 282 (10)                      |
| Crude OR (95% CI)                               | Reference               | 1.03 (0.92–1.16)                 | 1.79 (1.60–2.00) | 1.03 (0.87–1.21) | 1.36 (1.00–1.84)  | 1.19 (1.05–1.36)              |
| Adjusted OR* (95% CI)                           | Reference               | 1.05 (0.93–1.17)                 | 1.76 (1.57–1.98) | 1.04 (0.88–1.23) | 1.39 (1.02–1.89)  | 1.16 (1.02–1.33)              |
| <b>Entry dyspareunia, n=32 645</b>              |                         |                                  |                  |                  |                   |                               |
| Cases (%)                                       | 573 (3)                 | 148 (3)                          | 219 (8)          | 67 (4)           | 21 (5)            | 101 (4)                       |
| Crude OR (95% CI)                               | Reference               | 1.23 (1.02–1.48)                 | 3.04 (2.59–3.57) | 1.37 (1.06–1.77) | 1.93 (1.24–3.02)  | 1.38 (1.11–1.71)              |
| Adjusted OR* (95% CI)                           | Reference               | 1.19 (0.99–1.43)                 | 2.81 (2.38–3.32) | 1.37 (1.06–1.77) | 1.89 (1.20–2.95)  | 1.36 (1.09–1.68)              |
| <b>Deep dyspareunia, n=32 645</b>               |                         |                                  |                  |                  |                   |                               |
| Cases (%)                                       | 1 308 (6)               | 253 (6)                          | 206 (8)          | 96 (5)           | 29 (7)            | 182 (7)                       |
| Crude OR (95% CI)                               | Reference               | 0.91 (0.79–1.04)                 | 1.20 (1.03–1.40) | 0.84 (0.68–1.04) | 1.15 (0.79–1.69)  | 1.08 (0.92–1.27)              |
| Adjusted OR* (95% CI)                           | Reference               | 0.94 (0.82–1.09)                 | 1.21 (1.04–1.42) | 0.85 (0.69–1.06) | 1.21 (0.82–1.77)  | 1.05 (0.89–1.24)              |

\*Adjusted for maternal age at first birth, calendar year at first birth, pre-pregnant body mass index, socio-occupational status, self-assessed health, disease, exercise in pregnancy, and smoking in pregnancy.

C-section: Caesarean section; CI: Confidence interval; OR: Odds ratio; VBAC: Vaginal birth after caesarean section.



Supplemental table 4: Sexual problems by degree of perineal tear in participants with complete data.

|                                                 | No tear/first degree | Second degree    | Episiotomy       | Anal sphincter tear |
|-------------------------------------------------|----------------------|------------------|------------------|---------------------|
| <b>One or more sexual problem(s), n=25 655</b>  |                      |                  |                  |                     |
| Cases (%)                                       | 5 434 (37)           | 1 430 (38)       | 2 086 (36)       | 644 (37)            |
| Crude OR (95% CI)                               | Reference            | 1.04 (0.96–1.12) | 0.95 (0.89–1.01) | 1.00 (0.90–1.10)    |
| Adjusted OR* (95% CI)                           | Reference            | 1.03 (0.95–1.11) | 0.95 (0.89–1.02) | 0.98 (0.89–1.09)    |
| <b>Reduced sexual desire, n=26 194</b>          |                      |                  |                  |                     |
| Cases (%)                                       | 3 247 (22)           | 859 (23)         | 1 228 (21)       | 382 (22)            |
| Crude OR (95% CI)                               | Reference            | 1.03 (0.94–1.12) | 0.94 (0.87–1.01) | 0.99 (0.88–1.11)    |
| Adjusted OR* (95% CI)                           | Reference            | 1.01 (0.93–1.11) | 0.95 (0.88–1.02) | 0.98 (0.87–1.10)    |
| <b>Difficulty in obtaining orgasm, n=25 861</b> |                      |                  |                  |                     |
| Cases (%)                                       | 1 852 (13)           | 512 (14)         | 749 (13)         | 244 (14)            |
| Crude OR (95% CI)                               | Reference            | 1.09 (0.98–1.21) | 1.02 (0.93–1.12) | 1.13 (0.98–1.30)    |
| Adjusted OR* (95% CI)                           | Reference            | 1.07 (0.96–1.19) | 1.02 (0.93–1.11) | 1.11 (0.96–1.28)    |
| <b>Insufficient lubrication, n=25 945</b>       |                      |                  |                  |                     |
| Cases (%)                                       | 1 051 (7)            | 286 (8)          | 437 (8)          | 146 (8)             |
| Crude OR (95% CI)                               | Reference            | 1.06 (0.93–1.22) | 1.05 (0.93–1.18) | 1.18 (0.99–1.42)    |
| Adjusted OR* (95% CI)                           | Reference            | 1.08 (0.94–1.24) | 1.00 (0.89–1.12) | 1.16 (0.97–1.40)    |
| <b>Dyspareunia, n=26 028</b>                    |                      |                  |                  |                     |
| Cases (%)                                       | 1 348 (9)            | 340 (9)          | 519 (9)          | 160 (9)             |
| Crude OR (95% CI)                               | Reference            | 0.98 (0.86–1.11) | 0.96 (0.87–1.07) | 1.00 (0.84–1.18)    |
| Adjusted OR* (95% CI)                           | Reference            | 0.98 (0.86–1.11) | 0.98 (0.88–1.09) | 1.01 (0.85–1.20)    |
| <b>Entry dyspareunia, n=25 670</b>              |                      |                  |                  |                     |
| Cases (%)                                       | 415 (3)              | 103 (3)          | 187 (3)          | 65 (4)              |
| Crude OR (95% CI)                               | Reference            | 0.97 (0.78–1.20) | 1.14 (0.96–1.36) | 1.33 (1.02–1.74)    |
| Adjusted OR* (95% CI)                           | Reference            | 0.97 (0.78–1.21) | 1.12 (0.94–1.34) | 1.31 (1.00–1.71)    |
| <b>Deep dyspareunia, n=25 670</b>               |                      |                  |                  |                     |
| Cases (%)                                       | 954 (7)              | 245 (7)          | 326 (6)          | 101 (6)             |
| Crude OR (95% CI)                               | Reference            | 1.00 (0.87–1.16) | 0.85 (0.75–0.97) | 0.89 (0.72–1.09)    |
| Adjusted OR* (95% CI)                           | Reference            | 1.00 (0.86–1.15) | 0.88 (0.77–1.00) | 0.91 (0.74–1.13)    |

\*Adjusted for maternal age at first birth, calendar year at first birth, pre-pregnant body mass index, socio-occupational status, self-assessed health, disease, exercise in pregnancy, and smoking in pregnancy. CI: Confidence interval; OR: Odds ratio.

**Supplemental table 5: Exposures in participants and non-participants.**

|                                        | Participants in |                        |             |                              |
|----------------------------------------|-----------------|------------------------|-------------|------------------------------|
|                                        | The DNBC*       | The maternal follow-up | This study  | One or more sexual problems† |
| <b>Mode of birth, n (%)</b>            |                 |                        |             |                              |
| All                                    | 88 128          | 43 639                 | 37 417      | 35 514                       |
| Only spontaneous births                | 54 728 (62)     | 27 440 (63)            | 23 608 (63) | 22 496 (63)                  |
| Instrumental vaginal birth, ever       | 11 521 (13)     | 5 845 (13)             | 5 003 (13)  | 4 736 (13)                   |
| Only c-sections                        | 8 386 (10)      | 3 895 (9)              | 3 244 (9)   | 3 014 (9)                    |
| Spontaneous VBAC                       | 4 565 (5)       | 2 355 (5)              | 2 038 (5)   | 1 931 (5)                    |
| Instrumental VBAC                      | 1 080 (1)       | 526 (1)                | 457 (1)     | 431 (1)                      |
| C-section after vaginal birth          | 7 848 (9)       | 3 578 (8)              | 3 067 (8)   | 2 906 (8)                    |
| <b>Degree of perineal tear, n (%)‡</b> |                 |                        |             |                              |
| All                                    | 67 516          | 33 889                 | 29 253      | 27 864                       |
| No tear or first degree                | 38 625 (57)     | 19 094 (56)            | 16 404 (56) | 15 682 (56)                  |
| Second degree                          | 9 590 (14)      | 4 888 (14)             | 4 267 (15)  | 4 047 (15)                   |
| Episiotomy                             | 15 025 (22)     | 7 662 (23)             | 6 615 (23)  | 6 274 (23)                   |
| Anal sphincter tear                    | 4 276 (6)       | 2 245 (7)              | 1 967 (7)   | 1 861 (7)                    |

\*Women with a live- or stillbirth in the DNBC.

†The outcome with highest percentage of missing data.

‡Women with a vaginal birth and no birth prior to 1994.

C-section: Caesarean section; DNBC: Danish National Birth Cohort; VBAC: Vaginal birth after caesarean section.

**Supplemental table 6: Frequent dyspareunia by mode of birth.**

|                                    | Only sponta-<br>neous births | Instrumental vagi-<br>nal birth, ever | Only c-sections  | Spontaneous VBAC | Instrumental VBAC | C-section after<br>vaginal birth |
|------------------------------------|------------------------------|---------------------------------------|------------------|------------------|-------------------|----------------------------------|
| <b>Dyspareunia, n=36 266</b>       |                              |                                       |                  |                  |                   |                                  |
| Cases (%)                          | 415 (2)                      | 97 (2)                                | 166 (5)          | 30 (3)           | 13 (3)            | 74 (3)                           |
| Crude OR (95% CI)                  | Reference                    | 1.10 (0.88–1.38)                      | 3.06 (2.54–3.68) | 0.84 (0.57–1.21) | 1.63 (0.93–2.85)  | 1.39 (1.08–1.78)                 |
| Adjusted OR* (95% CI)              | Reference                    | 1.09 (0.87–1.36)                      | 2.82 (2.32–3.41) | 0.83 (0.57–1.21) | 1.59 (0.90–2.78)  | 1.32 (1.02–1.69)                 |
| <b>Entry dyspareunia, n=35 720</b> |                              |                                       |                  |                  |                   |                                  |
| Cases (%)                          | 181 (1)                      | 42 (1)                                | 106 (4)          | 15 (1)           | 8 (2)             | 32 (1)                           |
| Crude OR (95% CI)                  | Reference                    | 1.10 (0.78–1.54)                      | 4.49 (2.36–3.51) | 0.96 (0.57–1.63) | 2.32 (1.13–4.73)  | 1.37 (0.94–2.00)                 |
| Adjusted OR* (95% CI)              | Reference                    | 1.02 (0.73–1.43)                      | 3.92 (3.03–5.05) | 0.95 (0.56–1.61) | 2.17 (1.06–4.45)  | 1.32 (0.90–1.93)                 |
| <b>Deep dyspareunia, n=35 720</b>  |                              |                                       |                  |                  |                   |                                  |
| Cases (%)                          | 263 (1)                      | 63 (1)                                | 73 (2)           | 18 (1)           | 8 (2)             | 44 (2)                           |
| Crude OR (95% CI)                  | Reference                    | 1.14 (0.86–1.50)                      | 2.10 (1.61–2.72) | 0.79 (0.49–1.28) | 1.58 (0.78–3.23)  | 1.30 (0.94–1.79)                 |
| Adjusted OR* (95% CI)              | Reference                    | 1.17 (0.89–1.55)                      | 2.01 (1.53–2.64) | 0.79 (0.49–1.28) | 1.60 (0.78–3.27)  | 1.21 (0.88–1.67)                 |

\*Adjusted for maternal age at first birth, calendar year at first birth, pre-pregnant body mass index, socio-occupational status, self-assessed health, disease, exercise in pregnancy, and smoking in pregnancy.  
 C-section: Caesarean section; CI: Confidence interval; OR: Odds ratio; VBAC: Vaginal birth after caesarean section.

**Supplemental table 7: Participant Characteristics by Degree of Perineal Tear.**

|                                                | Degree of perineal tear |                             |                     |                         |                             |
|------------------------------------------------|-------------------------|-----------------------------|---------------------|-------------------------|-----------------------------|
|                                                | All<br>(n=29 253)       | None or first<br>(n=16 404) | Second<br>(n=4 267) | Episiotomy<br>(n=6 615) | Anal sphincter<br>(n=1 967) |
| <b>Age at first birth, n (%)</b>               |                         |                             |                     |                         |                             |
| <25                                            | 4 522 (15)              | 2 763 (17)                  | 563 (13)            | 993 (15)                | 203 (10)                    |
| 25–29                                          | 16 073 (55)             | 9 010 (55)                  | 2 394 (56)          | 3 566 (54)              | 1 103 (56)                  |
| 30–34                                          | 7 269 (25)              | 3 926 (24)                  | 1 085 (25)          | 1 716 (26)              | 542 (28)                    |
| ≥35                                            | 1 389 (5)               | 705 (4)                     | 225 (5)             | 340 (5)                 | 119 (6)                     |
| <b>Socio-occupational status, n (%)*</b>       |                         |                             |                     |                         |                             |
| Low                                            | 1 623 (6)               | 939 (6)                     | 227 (6)             | 367 (6)                 | 90 (5)                      |
| Middle                                         | 9 094 (33)              | 5 065 (33)                  | 1 367 (34)          | 2 081 (34)              | 581 (31)                    |
| High                                           | 16 804 (61)             | 9 459 (61)                  | 2 421 (60)          | 3 748 (60)              | 1 176 (64)                  |
| Missing                                        | 1 732                   | 941                         | 252                 | 419                     | 120                         |
| <b>Prepregnant BMI, n (%)*</b>                 |                         |                             |                     |                         |                             |
| <18.5                                          | 1 169 (4)               | 661 (4)                     | 120 (3)             | 320 (5)                 | 68 (4)                      |
| 18.5–24.9                                      | 19 579 (72)             | 11 142 (73)                 | 2 731 (69)          | 4 401 (72)              | 1 305 (72)                  |
| 25.0–29.9                                      | 4 801 (18)              | 2 573 (17)                  | 823 (21)            | 1 066 (17)              | 339 (19)                    |
| ≥30.0                                          | 1 654 (6)               | 923 (6)                     | 280 (7)             | 340 (6)                 | 111 (6)                     |
| Missing                                        | 2 050                   | 1 105                       | 313                 | 488                     | 144                         |
| <b>Exercise in pregnancy, min/week, n (%)*</b> |                         |                             |                     |                         |                             |
| None                                           | 16 147 (57)             | 8 981 (58)                  | 2 345 (58)          | 3 735 (60)              | 1 086 (59)                  |
| 1–180                                          | 9 112 (33)              | 5 120 (33)                  | 1 372 (34)          | 2 008 (32)              | 612 (33)                    |
| >180                                           | 2 289 (8)               | 1 382 (9)                   | 301 (7)             | 458 (7)                 | 148 (8)                     |
| Missing                                        | 1 705                   | 921                         | 249                 | 414                     | 121                         |
| <b>Smoking in pregnancy, n (%)*</b>            |                         |                             |                     |                         |                             |
| No smoking                                     | 22 390 (81)             | 12 437 (80)                 | 3 304 (81)          | 5 096 (81)              | 1 553 (83)                  |
| Smoking cessation                              | 2 461 (9)               | 1 415 (9)                   | 395 (10)            | 488 (8)                 | 163 (9)                     |

Supplemental table 7: Participant characteristics by degree of perineal tear (continued).

|                                      | Degree of perineal tear |                             |                     |                         |                             |
|--------------------------------------|-------------------------|-----------------------------|---------------------|-------------------------|-----------------------------|
|                                      | All<br>(n=29 253)       | None or first<br>(n=16 404) | Second<br>(n=4 267) | Episiotomy<br>(n=6 615) | Anal sphincter<br>(n=1 967) |
| Smoking                              | 2 930 (11)              | 1 749 (11)                  | 360 (9)             | 674 (11)                | 147 (8)                     |
| Missing                              | 1 472                   | 803                         | 208                 | 357                     | 104                         |
| <b>Self-assessed health, n (%)*</b>  |                         |                             |                     |                         |                             |
| Very good                            | 15 564 (56)             | 8 814 (57)                  | 2 265 (56)          | 3 472 (56)              | 1 013 (54)                  |
| Normal                               | 11 408 (41)             | 6 357 (41)                  | 1 677 (42)          | 2 569 (41)              | 805 (43)                    |
| Not so good                          | 695 (3)                 | 361 (2)                     | 98 (2)              | 190 (3)                 | 46 (2)                      |
| Missing                              | 1 586                   | 872                         | 227                 | 384                     | 103                         |
| <b>Presence of disease, n (%)**†</b> |                         |                             |                     |                         |                             |
| No                                   | 16 450 (60)             | 9 049 (58)                  | 2 511 (62)          | 3 713 (60)              | 1 177 (63)                  |
| Yes                                  | 11 109 (40)             | 6 428 (42)                  | 1 518 (38)          | 2 484 (40)              | 679 (37)                    |
| Missing                              | 1 694                   | 927                         | 238                 | 418                     | 111                         |

\*Percentage of non-missing values.

†Diseases that, according to the women, had been confirmed by a physician, including hypertensive disorders, diseases of the heart, thyroid, or musculoskeletal system, epilepsy, diabetes, gynaecological diseases, and mental illness.

BMI: Body mass index.

**Supplemental table 8: Frequent dyspareunia by degree of perineal tear.**

|                                    | No tear/first degree | Second degree    | Episiotomy       | Anal sphincter tear |
|------------------------------------|----------------------|------------------|------------------|---------------------|
| <b>Dyspareunia, n=28 398</b>       |                      |                  |                  |                     |
| Cases (%)                          | 296 (2)              | 80 (2)           | 116 (2)          | 37 (2)              |
| Crude OR (95% CI)                  | Reference            | 1.04 (0.81–1.34) | 0.98 (0.78–1.21) | 1.05 (0.74–1.48)    |
| Adjusted OR* (95% CI)              | Reference            | 1.04 (0.81–1.34) | 0.99 (0.80–1.23) | 1.06 (0.75–1.50)    |
| <b>Entry dyspareunia, n=28 006</b> |                      |                  |                  |                     |
| Cases (%)                          | 122 (1)              | 32 (1)           | 53 (1)           | 20 (1)              |
| Crude OR (95% CI)                  | Reference            | 1.02 (0.69–1.50) | 1.09 (0.78–1.50) | 1.38 (0.86–2.22)    |
| Adjusted OR* (95% CI)              | Reference            | 1.01 (0.68–1.50) | 1.05 (0.76–1.46) | 1.32 (0.82–2.13)    |
| <b>Deep dyspareunia, n=28 006</b>  |                      |                  |                  |                     |
| Cases (%)                          | 199 (1)              | 55 (1)           | 67 (1)           | 24 (1)              |
| Crude OR (95% CI)                  | Reference            | 1.07 (0.79–1.45) | 0.84 (0.63–1.11) | 1.01 (0.66–1.55)    |
| Adjusted OR* (95% CI)              | Reference            | 1.08 (0.80–1.47) | 0.87 (0.66–1.15) | 1.09 (0.71–1.67)    |

\*Adjusted for maternal age at first birth, calendar year at first birth, pre-pregnant body mass index, socio-occupational status, self-assessed health, disease, exercise in pregnancy, and smoking in pregnancy.  
CI: Confidence interval; OR: Odds ratio.

**Supplemental table 9: Sexual problems by mode of birth in women who had their first birth in the DNBC.**

|                                                     | Only sponta-<br>neous births | Instrumental vag-<br>inal birth, ever | Only c-sections  | Spontaneous<br>VBAC | Instrumental<br>VBAC | C-section after<br>vaginal birth |
|-----------------------------------------------------|------------------------------|---------------------------------------|------------------|---------------------|----------------------|----------------------------------|
| <b>One or more sexual problem(s),<br/>n=17 587</b>  |                              |                                       |                  |                     |                      |                                  |
| Cases (%)                                           | 4 069 (38)                   | 920 (39)                              | 865 (41)         | 342 (39)            | 90 (46)              | 517 (40)                         |
| Crude OR (95% CI)                                   | Reference                    | 1.07 (0.98–1.18)                      | 1.17 (1.06–1.28) | 1.04 (0.90–1.19)    | 1.43 (1.08–1.90)     | 1.10 (0.98–1.24)                 |
| Adjusted OR* (95% CI)                               | Reference                    | 1.07 (0.98–1.18)                      | 1.15 (1.04–1.27) | 1.04 (0.90–1.20)    | 1.43 (1.08–1.91)     | 1.09 (0.97–1.23)                 |
| <b>Reduced desire, n=17 941</b>                     |                              |                                       |                  |                     |                      |                                  |
| Cases (%)                                           | 2 466 (22)                   | 541 (23)                              | 500 (23)         | 211 (23)            | 52 (26)              | 295 (22)                         |
| Crude OR (95% CI)                                   | Reference                    | 1.02 (0.92–1.13)                      | 1.05 (0.94–1.17) | 1.05 (0.90–1.24)    | 1.22 (0.89–1.68)     | 1.00 (0.87–1.15)                 |
| Adjusted OR* (95% CI)                               | Reference                    | 1.02 (0.92–1.14)                      | 1.04 (0.93–1.17) | 1.06 (0.90–1.24)    | 1.22 (0.89–1.68)     | 0.98 (0.86–1.13)                 |
| <b>Difficulty in obtaining orgasm,<br/>n=17 730</b> |                              |                                       |                  |                     |                      |                                  |
| Cases (%)                                           | 1 397 (13)                   | 332 (14)                              | 285 (13)         | 131 (15)            | 33 (17)              | 176 (14)                         |
| Crude OR (95% CI)                                   | Reference                    | 1.11 (0.98–1.27)                      | 1.05 (0.92–1.21) | 1.16 (0.96–1.41)    | 1.37 (0.94–2.00)     | 1.06 (0.90–1.26)                 |
| Adjusted OR* (95% CI)                               | Reference                    | 1.11 (0.97–1.26)                      | 1.04 (0.91–1.20) | 1.16 (0.96–1.41)    | 1.38 (0.94–2.01)     | 1.06 (0.89–1.25)                 |
| <b>Insufficient lubrication,<br/>n=17 784</b>       |                              |                                       |                  |                     |                      |                                  |
| Cases (%)                                           | 738 (7)                      | 173 (7)                               | 220 (10)         | 55 (6)              | 21 (11)              | 124 (10)                         |
| Crude OR (95% CI)                                   | Reference                    | 1.09 (0.92–1.29)                      | 1.59 (1.35–1.86) | 0.90 (0.68–1.19)    | 1.65 (1.04–2.61)     | 1.44 (1.18–1.76)                 |
| Adjusted OR* (95% CI)                               | Reference                    | 1.03 (0.87–1.23)                      | 1.38 (1.17–1.62) | 0.91 (0.68–1.20)    | 1.64 (1.03–2.60)     | 1.45 (1.19–1.77)                 |
| <b>Dyspareunia, n=17 840</b>                        |                              |                                       |                  |                     |                      |                                  |
| Cases (%)                                           | 995 (9)                      | 230 (10)                              | 312 (15)         | 82 (9)              | 28 (14)              | 157 (12)                         |
| Crude OR (95% CI)                                   | Reference                    | 1.07 (0.92–1.25)                      | 1.71 (1.49–1.96) | 1.00 (0.79–1.27)    | 1.65 (1.10–2.48)     | 1.35 (1.13–1.62)                 |
| Adjusted OR* (95% CI)                               | Reference                    | 1.09 (0.93–1.26)                      | 1.69 (1.47–1.94) | 1.00 (0.79–1.27)    | 1.68 (1.12–2.53)     | 1.31 (1.09–1.57)                 |
| <b>Entry dyspareunia, n=17 573</b>                  |                              |                                       |                  |                     |                      |                                  |
| Cases (%)                                           | 300 (3)                      | 80 (3)                                | 158 (8)          | 33 (4)              | 11 (6)               | 54 (4)                           |
| Crude OR (95% CI)                                   | Reference                    | 1.24 (0.97–1.60)                      | 2.87 (2.36–3.51) | 1.35 (0.93–1.94)    | 2.09 (1.13–3.88)     | 1.52 (1.13–2.04)                 |
| Adjusted OR* (95% CI)                               | Reference                    | 1.20 (0.93–1.54)                      | 2.56 (2.08–3.14) | 1.35 (0.93–1.95)    | 2.06 (1.11–3.83)     | 1.52 (1.13–2.04)                 |
| <b>Deep dyspareunia, n=17 573</b>                   |                              |                                       |                  |                     |                      |                                  |
| Cases (%)                                           | 721 (7)                      | 151 (6)                               | 160 (8)          | 50 (6)              | 18 (9)               | 182 (8)                          |
| Crude OR (95% CI)                                   | Reference                    | 0.97 (0.81–1.16)                      | 1.16 (0.97–1.39) | 0.83 (0.62–1.12)    | 1.42 (0.87–2.32)     | 1.27 (1.03–1.57)                 |
| Adjusted OR* (95% CI)                               | Reference                    | 1.00 (0.83–1.20)                      | 1.21 (1.01–1.45) | 0.84 (0.62–1.12)    | 1.48 (0.90–2.42)     | 1.21 (0.98–1.50)                 |

\*Adjusted for maternal age at first birth, calendar year at first birth, pre-pregnant body mass index, socio-occupational status, self-assessed health, disease, exercise in pregnancy, and smoking in pregnancy. C-section: Caesarean section; CI: Confidence interval; DNBC: Danish National Birth Cohort; OR: Odds ratio; VBAC: Vaginal birth after caesarean section.

**Supplemental table 10: Sexual problems by degree of perineal tear in women who had their first birth in the DNBC.**

|                                                 | No tear/first degree | Second degree    | Episiotomy       | Anal sphincter tear |
|-------------------------------------------------|----------------------|------------------|------------------|---------------------|
| <b>One or more sexual problem(s), n=15 496</b>  |                      |                  |                  |                     |
| Cases (%)                                       | 3 251 (38)           | 1 087 (39)       | 1 120 (37)       | 480 (39)            |
| Crude OR (95% CI)                               | Reference            | 1.03 (0.95–1.13) | 0.94 (0.87–1.03) | 1.01 (0.90–1.14)    |
| Adjusted OR* (95% CI)                           | Reference            | 1.04 (0.95–1.13) | 0.94 (0.86–1.02) | 1.02 (0.90–1.15)    |
| <b>Reduced sexual desire, n=15 794</b>          |                      |                  |                  |                     |
| Cases (%)                                       | 1 971 (23)           | 650 (23)         | 655 (21)         | 289 (23)            |
| Crude OR (95% CI)                               | Reference            | 0.99 (0.90–1.10) | 0.91 (0.82–1.00) | 1.00 (0.87–1.15)    |
| Adjusted OR* (95% CI)                           | Reference            | 1.00 (0.90–1.11) | 0.91 (0.82–1.01) | 1.01 (0.88–1.16)    |
| <b>Difficulty in obtaining orgasm, n=15 610</b> |                      |                  |                  |                     |
| Cases (%)                                       | 1 108 (13)           | 386 (14)         | 402 (13)         | 173 (14)            |
| Crude OR (95% CI)                               | Reference            | 1.07 (0.95–1.22) | 1.01 (0.90–1.15) | 1.08 (0.91–1.28)    |
| Adjusted OR* (95% CI)                           | Reference            | 1.07 (0.95–1.21) | 1.01 (0.89–1.14) | 1.08 (0.91–1.28)    |
| <b>Insufficient lubrication, n=15 656</b>       |                      |                  |                  |                     |
| Cases (%)                                       | 572 (7)              | 208 (7)          | 224 (7)          | 107 (9)             |
| Crude OR (95% CI)                               | Reference            | 1.12 (0.95–1.32) | 1.10 (0.94–1.29) | 1.31 (1.05–1.62)    |
| Adjusted OR* (95% CI)                           | Reference            | 1.11 (0.94–1.31) | 1.07 (0.91–1.25) | 1.27 (1.03–1.58)    |
| <b>Dyspareunia, n=15 705</b>                    |                      |                  |                  |                     |
| Cases (%)                                       | 834 (10)             | 261 (9)          | 269 (9)          | 128 (10)            |
| Crude OR (95% CI)                               | Reference            | 0.94 (0.82–1.09) | 0.89 (0.77–1.03) | 1.05 (0.87–1.28)    |
| Adjusted OR* (95% CI)                           | Reference            | 0.95 (0.82–1.10) | 0.89 (0.77–1.03) | 1.08 (0.89–1.32)    |
| <b>Entry dyspareunia, n=15 494</b>              |                      |                  |                  |                     |
| Cases (%)                                       | 247 (3)              | 78 (3)           | 102 (3)          | 51 (4)              |
| Crude OR (95% CI)                               | Reference            | 0.96 (0.74–1.24) | 1.16 (0.92–1.46) | 1.43 (1.04–1.94)    |
| Adjusted OR* (95% CI)                           | Reference            | 0.95 (0.73–1.23) | 1.13 (0.90–1.43) | 1.41 (1.03–1.92)    |
| <b>Deep dyspareunia, n=15 494</b>               |                      |                  |                  |                     |
| Cases (%)                                       | 603 (7)              | 191 (7)          | 172 (6)          | 82 (7)              |
| Crude OR (95% CI)                               | Reference            | 0.96 (0.81–1.14) | 0.78 (0.66–0.93) | 0.92 (0.73–1.17)    |
| Adjusted OR* (95% CI)                           | Reference            | 0.97 (0.82–1.15) | 0.79 (0.66–0.94) | 0.97 (0.76–1.22)    |

\*Adjusted for maternal age at first birth, calendar year at first birth, pre-pregnant body mass index, socio-occupational status, self-assessed health, disease, exercise in pregnancy, and smoking in pregnancy.  
CI: Confidence interval; DNBC: Danish National Birth Cohort; OR: Odds ratio.



Supplemental table 11: Sexual problems by mode of birth in participants without vaginismus.

|                                                 | Only sponta-<br>neous births | Instrumental vagi-<br>nal birth, ever | Only c-sections  | Spontaneous VBAC | Instrumental VBAC | C-section after<br>vaginal birth |
|-------------------------------------------------|------------------------------|---------------------------------------|------------------|------------------|-------------------|----------------------------------|
| <b>One or more sexual problem(s), n=35 343</b>  |                              |                                       |                  |                  |                   |                                  |
| Cases (%)                                       | 8 196 (37)                   | 1 759 (37)                            | 1 229 (41)       | 705 (37)         | 185 (43)          | 1 119 (39)                       |
| Crude OR (95% CI)                               | Reference                    | 1.02 (0.96–1.09)                      | 1.21 (1.12–1.31) | 1.00 (0.91–1.11) | 1.33 (1.10–1.61)  | 1.10 (1.02–1.20)                 |
| Adjusted OR* (95% CI)                           | Reference                    | 1.02 (0.95–1.08)                      | 1.17 (1.08–1.27) | 1.00 (0.91–1.11) | 1.33 (1.09–1.61)  | 1.09 (1.01–1.18)                 |
| <b>Reduced desire, n=36 139</b>                 |                              |                                       |                  |                  |                   |                                  |
| Cases (%)                                       | 4 917 (22)                   | 1 034 (21)                            | 702 (23)         | 431 (22)         | 103 (24)          | 639 (22)                         |
| Crude OR (95% CI)                               | Reference                    | 0.99 (0.92–1.07)                      | 1.08 (0.99–1.18) | 1.03 (0.93–1.15) | 1.13 (0.90–1.41)  | 1.02 (0.93–1.11)                 |
| Adjusted OR* (95% CI)                           | Reference                    | 0.99 (0.92–1.07)                      | 1.04 (0.95–1.14) | 1.03 (0.92–1.15) | 1.13 (0.90–1.41)  | 1.00 (0.91–1.10)                 |
| <b>Difficulty in obtaining orgasm, n=35 650</b> |                              |                                       |                  |                  |                   |                                  |
| Cases (%)                                       | 2 822 (13)                   | 631 (13)                              | 406 (13)         | 252 (13)         | 71 (17)           | 390 (13)                         |
| Crude OR (95% CI)                               | Reference                    | 1.06 (0.97–1.16)                      | 1.08 (0.97–1.21) | 1.04 (0.91–1.20) | 1.39 (1.07–1.80)  | 1.09 (0.97–1.22)                 |
| Adjusted OR* (95% CI)                           | Reference                    | 1.05 (0.96–1.16)                      | 1.05 (0.94–1.18) | 1.04 (0.91–1.20) | 1.38 (1.07–1.79)  | 1.08 (0.97–1.21)                 |
| <b>Insufficient lubrication, n=35 777</b>       |                              |                                       |                  |                  |                   |                                  |
| Cases (%)                                       | 1 663 (7)                    | 370 (8)                               | 318 (11)         | 131 (7)          | 42 (10)           | 290 (10)                         |
| Crude OR (95% CI)                               | Reference                    | 1.05 (0.94–1.18)                      | 1.48 (1.30–1.67) | 0.91 (0.76–1.09) | 1.35 (0.98–1.87)  | 1.39 (1.22–1.59)                 |
| Adjusted OR* (95% CI)                           | Reference                    | 0.99 (0.88–1.12)                      | 1.36 (1.19–1.55) | 0.89 (0.74–1.08) | 1.28 (0.92–1.77)  | 1.35 (1.18–1.54)                 |
| <b>Dyspareunia, n=35 894</b>                    |                              |                                       |                  |                  |                   |                                  |
| Cases (%)                                       | 1 958 (9)                    | 431 (9)                               | 432 (14)         | 160 (8)          | 51 (12)           | 301 (10)                         |
| Crude OR (95% CI)                               | Reference                    | 1.04 (0.93–1.16)                      | 1.75 (1.56–1.96) | 0.94 (0.80–1.12) | 1.40 (1.04–1.89)  | 1.22 (1.07–1.38)                 |
| Adjusted OR* (95% CI)                           | Reference                    | 1.06 (0.95–1.18)                      | 1.73 (1.54–1.94) | 0.95 (0.80–1.12) | 1.42 (1.06–1.92)  | 1.18 (1.04–1.35)                 |
| <b>Entry dyspareunia, n=35 352</b>              |                              |                                       |                  |                  |                   |                                  |
| Cases (%)                                       | 613 (3)                      | 153 (3)                               | 223 (8)          | 60 (3)           | 21 (5)            | 109 (4)                          |
| Crude OR (95% CI)                               | Reference                    | 1.19 (0.99–1.42)                      | 2.88 (2.46–3.38) | 1.14 (0.87–1.49) | 1.84 (1.18–2.88)  | 1.40 (1.13–1.72)                 |
| Adjusted OR* (95% CI)                           | Reference                    | 1.15 (0.96–1.37)                      | 2.71 (2.30–3.19) | 1.14 (0.87–1.49) | 1.80 (1.15–2.82)  | 1.38 (1.12–1.70)                 |
| <b>Deep dyspareunia, n=35 352</b>               |                              |                                       |                  |                  |                   |                                  |
| Cases (%)                                       | 1 367 (6)                    | 269 (6)                               | 222 (8)          | 98 (5)           | 32 (8)            | 195 (7)                          |
| Crude OR (95% CI)                               | Reference                    | 0.93 (0.81–1.06)                      | 1.24 (1.07–1.44) | 0.82 (0.66–1.01) | 1.25 (0.87–1.80)  | 1.12 (0.96–1.30)                 |
| Adjusted OR* (95% CI)                           | Reference                    | 0.96 (0.84–1.10)                      | 1.25 (1.07–1.45) | 0.83 (0.67–1.03) | 1.29 (0.90–1.87)  | 1.08 (0.93–1.27)                 |

\*Adjusted for maternal age at first birth, calendar year at first birth, pre-pregnant body mass index, socio-occupational status, self-assessed health, disease, exercise in pregnancy, and smoking in pregnancy. C-section: Caesarean section; CI: Confidence interval; OR: Odds ratio; VBAC: Vaginal birth after caesarean section.

Supplemental figure 1: Directed acyclic graph

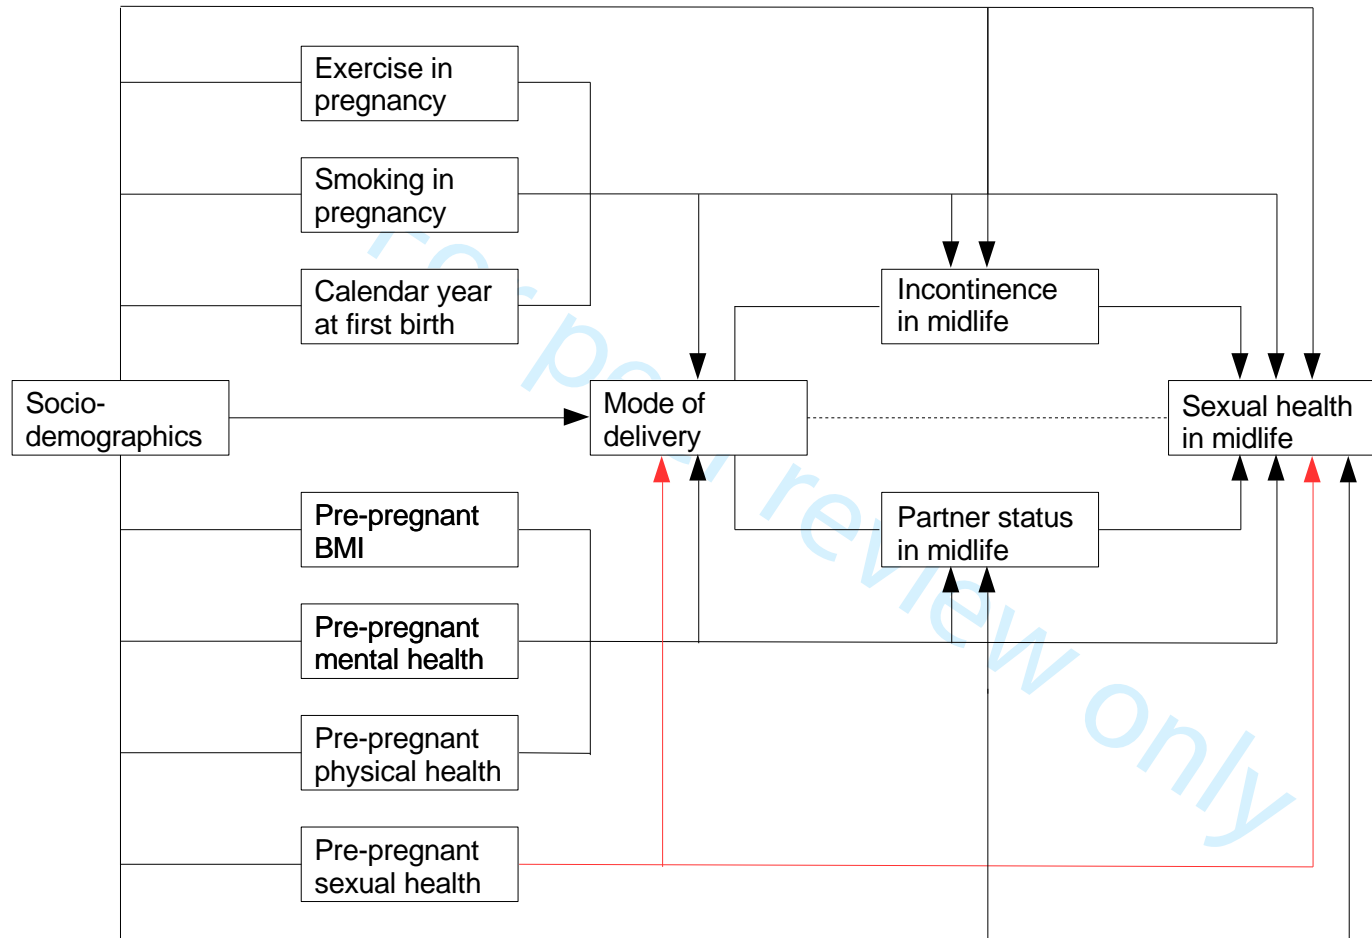

The red arrows represent unadjusted confounding from pre-pregnant sexual health. The dotted line represents the study question. BMI: Body mass index.

STROBE Statement—Checklist of items that should be included in reports of *cohort studies*

|                              | Item No | Recommendation                                                                                                                                                                                                                                                                                                         | Page No                            |
|------------------------------|---------|------------------------------------------------------------------------------------------------------------------------------------------------------------------------------------------------------------------------------------------------------------------------------------------------------------------------|------------------------------------|
| <b>Title and abstract</b>    | 1       | (a) Indicate the study's design with a commonly used term in the title or the abstract<br>(b) Provide in the abstract an informative and balanced summary of what was done and what was found                                                                                                                          | 1<br>2-3                           |
| <b>Introduction</b>          |         |                                                                                                                                                                                                                                                                                                                        |                                    |
| Background/rationale         | 2       | Explain the scientific background and rationale for the investigation being reported                                                                                                                                                                                                                                   | 3                                  |
| Objectives                   | 3       | State specific objectives, including any prespecified hypotheses                                                                                                                                                                                                                                                       | 4                                  |
| <b>Methods</b>               |         |                                                                                                                                                                                                                                                                                                                        |                                    |
| Study design                 | 4       | Present key elements of study design early in the paper                                                                                                                                                                                                                                                                | 4                                  |
| Setting                      | 5       | Describe the setting, locations, and relevant dates, including periods of recruitment, exposure, follow-up, and data collection                                                                                                                                                                                        | 4                                  |
| Participants                 | 6       | (a) Give the eligibility criteria, and the sources and methods of selection of participants. Describe methods of follow-up<br>(b) For matched studies, give matching criteria and number of exposed and unexposed                                                                                                      | 6<br>Not applicable                |
| Variables                    | 7       | Clearly define all outcomes, exposures, predictors, potential confounders, and effect modifiers. Give diagnostic criteria, if applicable                                                                                                                                                                               | 4-6                                |
| Data sources/<br>measurement | 8*      | For each variable of interest, give sources of data and details of methods of assessment (measurement). Describe comparability of assessment methods if there is more than one group                                                                                                                                   | 4                                  |
| Bias                         | 9       | Describe any efforts to address potential sources of bias                                                                                                                                                                                                                                                              | 6-7                                |
| Study size                   | 10      | Explain how the study size was arrived at                                                                                                                                                                                                                                                                              | 6                                  |
| Quantitative variables       | 11      | Explain how quantitative variables were handled in the analyses. If applicable, describe which groupings were chosen and why                                                                                                                                                                                           | 6-7                                |
| Statistical methods          | 12      | (a) Describe all statistical methods, including those used to control for confounding<br>(b) Describe any methods used to examine subgroups and interactions<br>(c) Explain how missing data were addressed<br>(d) If applicable, explain how loss to follow-up was addressed<br>(e) Describe any sensitivity analyses | 7<br>7<br>7<br>Not applicable<br>7 |
| <b>Results</b>               |         |                                                                                                                                                                                                                                                                                                                        |                                    |
| Participants                 | 13*     | (a) Report numbers of individuals at each stage of study—eg numbers potentially eligible, examined for eligibility, confirmed eligible, included in the study, completing follow-up, and analysed<br>(b) Give reasons for non-participation at each stage<br>(c) Consider use of a flow diagram                        | 6 and figure 1<br>6<br>Figure 1    |
| Descriptive data             | 14*     | (a) Give characteristics of study participants (eg demographic, clinical, social) and information on exposures and potential confounders<br>(b) Indicate number of participants with missing data for each variable of interest<br>(c) Summarise follow-up time (eg, average and total amount)                         | 8-9<br>Table 1 and supplement 8    |
| Outcome data                 | 15*     | Report numbers of outcome events or summary measures over time                                                                                                                                                                                                                                                         | Table 2 and 3                      |

|    |                          |    |                                                                                                                                                                                                              |
|----|--------------------------|----|--------------------------------------------------------------------------------------------------------------------------------------------------------------------------------------------------------------|
| 1  |                          |    |                                                                                                                                                                                                              |
| 2  |                          |    |                                                                                                                                                                                                              |
| 3  | Main results             | 16 | (a) Give unadjusted estimates and, if applicable, confounder-adjusted estimates and their precision (eg, 95% confidence interval). Make clear which confounders were adjusted for and why they were included |
| 4  |                          |    |                                                                                                                                                                                                              |
| 5  |                          |    |                                                                                                                                                                                                              |
| 6  |                          |    | (b) Report category boundaries when continuous variables were categorized                                                                                                                                    |
| 7  |                          |    | (c) If relevant, consider translating estimates of relative risk into absolute risk for a meaningful time period                                                                                             |
| 8  |                          |    |                                                                                                                                                                                                              |
| 9  |                          |    |                                                                                                                                                                                                              |
| 10 | Other analyses           | 17 | Report other analyses done—eg analyses of subgroups and interactions, and sensitivity analyses                                                                                                               |
| 11 |                          |    |                                                                                                                                                                                                              |
| 12 |                          |    |                                                                                                                                                                                                              |
| 13 | <b>Discussion</b>        |    |                                                                                                                                                                                                              |
| 14 | Key results              | 18 | Summarise key results with reference to study objectives                                                                                                                                                     |
| 15 | Limitations              | 19 | Discuss limitations of the study, taking into account sources of potential bias or imprecision. Discuss both direction and magnitude of any potential bias                                                   |
| 16 |                          |    |                                                                                                                                                                                                              |
| 17 |                          |    |                                                                                                                                                                                                              |
| 18 | Interpretation           | 20 | Give a cautious overall interpretation of results considering objectives, limitations, multiplicity of analyses, results from similar studies, and other relevant evidence                                   |
| 19 |                          |    |                                                                                                                                                                                                              |
| 20 | Generalisability         | 21 | Discuss the generalisability (external validity) of the study results                                                                                                                                        |
| 21 |                          |    |                                                                                                                                                                                                              |
| 22 | <b>Other information</b> |    |                                                                                                                                                                                                              |
| 23 | Funding                  | 22 | Give the source of funding and the role of the funders for the present study and, if applicable, for the original study on which the present article is based                                                |
| 24 |                          |    |                                                                                                                                                                                                              |
| 25 |                          |    |                                                                                                                                                                                                              |
| 26 |                          |    |                                                                                                                                                                                                              |
| 27 |                          |    |                                                                                                                                                                                                              |
| 28 |                          |    |                                                                                                                                                                                                              |
| 29 |                          |    |                                                                                                                                                                                                              |
| 30 |                          |    |                                                                                                                                                                                                              |
| 31 |                          |    |                                                                                                                                                                                                              |
| 32 |                          |    |                                                                                                                                                                                                              |
| 33 |                          |    |                                                                                                                                                                                                              |
| 34 |                          |    |                                                                                                                                                                                                              |
| 35 |                          |    |                                                                                                                                                                                                              |
| 36 |                          |    |                                                                                                                                                                                                              |
| 37 |                          |    |                                                                                                                                                                                                              |
| 38 |                          |    |                                                                                                                                                                                                              |
| 39 |                          |    |                                                                                                                                                                                                              |
| 40 |                          |    |                                                                                                                                                                                                              |
| 41 |                          |    |                                                                                                                                                                                                              |
| 42 |                          |    |                                                                                                                                                                                                              |
| 43 |                          |    |                                                                                                                                                                                                              |
| 44 |                          |    |                                                                                                                                                                                                              |
| 45 |                          |    |                                                                                                                                                                                                              |
| 46 |                          |    |                                                                                                                                                                                                              |
| 47 |                          |    |                                                                                                                                                                                                              |
| 48 |                          |    |                                                                                                                                                                                                              |
| 49 |                          |    |                                                                                                                                                                                                              |
| 50 |                          |    |                                                                                                                                                                                                              |
| 51 |                          |    |                                                                                                                                                                                                              |
| 52 |                          |    |                                                                                                                                                                                                              |
| 53 |                          |    |                                                                                                                                                                                                              |
| 54 |                          |    |                                                                                                                                                                                                              |
| 55 |                          |    |                                                                                                                                                                                                              |
| 56 |                          |    |                                                                                                                                                                                                              |
| 57 |                          |    |                                                                                                                                                                                                              |
| 58 |                          |    |                                                                                                                                                                                                              |
| 59 |                          |    |                                                                                                                                                                                                              |
| 60 |                          |    |                                                                                                                                                                                                              |

\*Give information separately for exposed and unexposed groups.

**Note:** An Explanation and Elaboration article discusses each checklist item and gives methodological background and published examples of transparent reporting. The STROBE checklist is best used in conjunction with this article (freely available on the Web sites of PLoS Medicine at <http://www.plosmedicine.org/>, Annals of Internal Medicine at <http://www.annals.org/>, and Epidemiology at <http://www.epidem.com/>). Information on the STROBE Initiative is available at <http://www.strobe-statement.org>.
