# Supplementary material for: Mode of birth and long-term sexual health: a follow-up study of mothers in the Danish National Birth Cohort
Source: PubMed Central journal article supplement — BMJ Open. 2019 Nov 3;9(11):e029517. doi: 10.1136/bmjopen-2019-029517 (PMC6858091; doi:10.1136/bmjopen-2019-029517), 2019-11-03
Supplement: bmjopen-2019-029517supp001.pdf [file bmjopen-2019-029517supp001.pdf]

## **Mode of birth and long term sexual health: a follow-up study of mothers in the Danish National Birth Cohort**

Sarah Hjorth, Helene Kirkegaard, Jørn Olsen, Jim G Thornton, Ellen A Nohr

### **Supplemental material**

The supplementary material contains:

Supplemental table 1: Sexual health in the past year (2012-2013) in mothers in their mid-forties (N=37 147).

Supplemental table 2: Sexual problems by degree of perineal tear, 3<sup>rd</sup> and 4<sup>th</sup> degree tears analysed separately.

Supplemental table 3: Sexual problems by mode of birth in participants with complete data.

Supplemental table 4: Sexual problems by degree of perineal tear in participants with complete data.

Supplemental table 5: Exposures in participants and non-participants.

Supplemental table 6: Frequent dyspareunia by mode of birth.

Supplemental table 7: Participant characteristics by degree of perineal tear.

Supplemental table 8: Frequent dyspareunia by degree of perineal tear.

Supplemental table 9: Sexual problems by mode of birth in women who had their first birth in the DNBC.

Supplemental table 10: Sexual problems by degree of perineal tear in women who had their first birth in the DNBC.

Supplemental table 11: Sexual problems by mode of birth in participants without vaginismus.

Supplemental figure 1: Directed acyclic graph.

**Supplemental table 1: Sexual health in the past year (2012-2013) in mothers in their mid-forties (N=42 132).**

|                                                                                               | Women with a partner,<br>N=37 417 |       | Women without a<br>partner, N=4 715 |       |
|-----------------------------------------------------------------------------------------------|-----------------------------------|-------|-------------------------------------|-------|
| <b>Have your sexual needs been met?, n (%)*</b>                                               |                                   |       |                                     |       |
| Completely                                                                                    | 15 081                            | (41)  | 417                                 | (9)   |
| Almost completely                                                                             | 10 208                            | (29)  | 537                                 | (12)  |
| Partially                                                                                     | 6 666                             | (18)  | 1 067                               | (23)  |
| A little                                                                                      | 2 248                             | (6)   | 918                                 | (20)  |
| Not at all                                                                                    | 1 090                             | (3)   | 1 214                               | (27)  |
| I have not had sexual needs                                                                   | 1 108                             | (3)   | 362                                 | (8)   |
| I do not know                                                                                 | 290                               | (1)   | 52                                  | (1)   |
| <b>How often have you been sexually active with another person?, n (%)*</b>                   |                                   |       |                                     |       |
| Every day                                                                                     | 89                                | (0.2) | 6                                   | (0.1) |
| 3–6 times a week                                                                              | 3 432                             | (9)   | 185                                 | (4)   |
| 1–2 times a week                                                                              | 13 640                            | (37)  | 553                                 | (12)  |
| 1–3 times a month                                                                             | 12 671                            | (35)  | 885                                 | (20)  |
| Less than once a month                                                                        | 4 960                             | (14)  | 1 177                               | (26)  |
| Not at all                                                                                    | 1 327                             | (4)   | 1 600                               | (35)  |
| I do not know                                                                                 | 348                               | (1)   | 122                                 | (3)   |
| <b>Have you experienced lacking or reduced sexual desire?, n (%)*</b>                         |                                   |       |                                     |       |
| Yes, all the time                                                                             | 1 551                             | (4)   | 234                                 | (5)   |
| Yes, often                                                                                    | 7 551                             | (21)  | 505                                 | (11)  |
| Yes, sometimes                                                                                | 13 566                            | (37)  | 755                                 | (17)  |
| Yes, but rarely                                                                               | 9 084                             | (25)  | 764                                 | (17)  |
| No, never                                                                                     | 4 612                             | (13)  | 1 681                               | (37)  |
| I do not know                                                                                 | 376                               | (1)   | 608                                 | (13)  |
| <b>If yes, was it a problem for you?</b>                                                      |                                   |       |                                     |       |
| Yes                                                                                           | 7 945                             | (35)  | 287                                 | (19)  |
| No                                                                                            | 12 220                            | (55)  | 1 077                               | (73)  |
| I do not know                                                                                 | 2 275                             | (10)  | 119                                 | (8)   |
| <b>Was it a problem for your partner?</b>                                                     |                                   |       |                                     |       |
| Yes                                                                                           | 12 752                            | (61)  | -                                   |       |
| No                                                                                            | 4 465                             | (21)  | -                                   |       |
| I do not know                                                                                 | 3 740                             | (18)  | -                                   |       |
| <b>Have you experienced the following during sexual activity with another person?, n (%)*</b> |                                   |       |                                     |       |

**Supplemental table 1: Sexual health in the past year (2012-2013) in mothers in their mid-forties (N=37 147) (continued).**

|                                                                       | Women with a partner,<br>N=37 417 |        | Women without a<br>partner, N=4 715 |        |
|-----------------------------------------------------------------------|-----------------------------------|--------|-------------------------------------|--------|
| <b>I have not been sufficiently wet in the vagina</b>                 |                                   |        |                                     |        |
| Not at all                                                            | 18 242                            | (51)   | 2 468                               | (57)   |
| Rarely                                                                | 8 272                             | (23)   | 572                                 | (13)   |
| Sometimes                                                             | 5 938                             | (16)   | 337                                 | (8)    |
| Often                                                                 | 2 024                             | (6)    | 126                                 | (3)    |
| Every time                                                            | 885                               | (2)    | 62                                  | (1)    |
| I do not know                                                         | 787                               | (2)    | 770                                 | (18)   |
| <b>I have not, or only with great difficulty, achieved orgasm</b>     |                                   |        |                                     |        |
| Not at all                                                            | 13 119                            | (36)   | 1 566                               | (36)   |
| Rarely                                                                | 10 580                            | (29)   | 854                                 | (20)   |
| Sometimes                                                             | 6 853                             | (19)   | 632                                 | (15)   |
| Often                                                                 | 2 943                             | (8)    | 324                                 | (8)    |
| Every time                                                            | 1 707                             | (5)    | 208                                 | (5)    |
| I do not know                                                         | 817                               | (2)    | 730                                 | (17)   |
| <b>I have had vaginismus that prevented intercourse</b>               |                                   |        |                                     |        |
| Not at all                                                            | 34 601                            | (95)   | 3 557                               | (82)   |
| Rarely                                                                | 638                               | (2)    | 58                                  | (1)    |
| Sometimes                                                             | 269                               | (1)    | 17                                  | (0.4)  |
| Often                                                                 | 87                                | (0.2)  | <5                                  | (<0.1) |
| Every time                                                            | 16                                | (<0.1) | 0                                   | (0)    |
| I do not know                                                         | 647                               | (2)    | 701                                 | (16)   |
| <b>I have had pain in my genitals and/or abdomen with intercourse</b> |                                   |        |                                     |        |
| Not at all                                                            | 26 965                            | (74)   | 3 019                               | (70)   |
| Rarely                                                                | 5 256                             | (14)   | 338                                 | (8)    |
| Sometimes                                                             | 2 704                             | (7)    | 185                                 | (4)    |
| Often                                                                 | 584                               | (2)    | 48                                  | (1)    |
| Every time                                                            | 211                               | (1)    | 23                                  | (1)    |
| I do not know                                                         | 546                               | (2)    | 720                                 | (17)   |
| <b>If yes, where was the pain located?†</b>                           |                                   |        |                                     |        |
| At the vaginal entrance                                               | 1 253                             | (36)   | 71                                  | (28)   |
| Deep in the abdomen                                                   | 2 277                             | (65)   | 197                                 | (77)   |
| I do not know                                                         | 228                               | (7)    | 14                                  | (5)    |

\*Percentage of those who have answered the question. The number of answers available for analysis for each outcome differed, as the response option 'I do not wish to answer this question' was provided for questions on sexual health and varied for all questions between 210 and 1361. In general, women without a partner more often used this answer category. The number of missing values were between 0 and 37 for all questions except 'was it a problem for your partner?' with 1503 missing values. The proportion of missing values did not differ between women with and without a partner.

†More than one answer could be given, wherefore the percentage adds up to more than 100.

**Supplemental table 2: Sexual problems by degree of perineal tear, 3<sup>rd</sup> and 4<sup>th</sup> degree tears analysed separately.**

|                                                 | No tear/first degree | Second degree    | Episiotomy       | Third degree     | Fourth degree    |
|-------------------------------------------------|----------------------|------------------|------------------|------------------|------------------|
| <b>One or more sexual problem(s), n=27 992</b>  |                      |                  |                  |                  |                  |
| Cases (%)                                       | 5 882 (37)           | 1 560 (38)       | 2 278 (36)       | 617 (38)         | 99 (42)          |
| Crude OR (95% CI)                               | Reference            | 1.04 (0.97–1.12) | 0.95 (0.90–1.01) | 1.01 (0.91–1.12) | 1.19 (0.92–1.55) |
| Adjusted OR* (95% CI)                           | Reference            | 1.03 (0.96–1.11) | 0.95 (0.90–1.01) | 1.00 (0.90–1.11) | 1.17 (0.90–1.52) |
| <b>Reduced sexual desire, n=28 586</b>          |                      |                  |                  |                  |                  |
| Cases (%)                                       | 3 523 (22)           | 935 (22)         | 1 342 (21)       | 369 (22)         | 54 (22)          |
| Crude OR (95% CI)                               | Reference            | 1.02 (0.94–1.11) | 0.94 (0.87–1.00) | 1.01 (0.89–1.14) | 1.00 (0.74–1.36) |
| Adjusted OR* (95% CI)                           | Reference            | 1.01 (0.93–1.10) | 0.95 (0.88–1.01) | 1.00 (0.88–1.13) | 0.99 (0.73–1.34) |
| <b>Difficulty in obtaining orgasm, n=28 217</b> |                      |                  |                  |                  |                  |
| Cases (%)                                       | 2 006 (13)           | 553 (13)         | 817 (13)         | 232 (14)         | 29 (12)          |
| Crude OR (95% CI)                               | Reference            | 1.08 (0.97–1.19) | 1.02 (0.93–1.11) | 1.13 (0.98–1.31) | 0.94 (0.64–1.39) |
| Adjusted OR* (95% CI)                           | Reference            | 1.07 (0.96–1.18) | 1.01 (0.93–1.11) | 1.12 (0.96–1.29) | 0.92 (0.62–1.36) |
| <b>Insufficient lubrication, n=28 308</b>       |                      |                  |                  |                  |                  |
| Cases (%)                                       | 1 133 (7)            | 314 (8)          | 481 (8)          | 139 (8)          | 24 (10)          |
| Crude OR (95% CI)                               | Reference            | 1.08 (0.95–1.23) | 1.06 (0.95–1.19) | 1.19 (0.99–1.43) | 1.43 (0.93–2.19) |
| Adjusted OR* (95% CI)                           | Reference            | 1.09 (0.96–1.25) | 1.02 (0.91–1.14) | 1.17 (0.97–1.41) | 1.42 (0.93–1.19) |
| <b>Dyspareunia, n=28 398</b>                    |                      |                  |                  |                  |                  |
| Cases (%)                                       | 1 469 (9)            | 372 (9)          | 562 (9)          | 158 (10)         | 26 (11)          |
| Crude OR (95% CI)                               | Reference            | 0.98 (0.87–1.10) | 0.95 (0.86–1.05) | 1.04 (0.87–1.23) | 1.18 (0.78–1.77) |
| Adjusted OR* (95% CI)                           | Reference            | 0.97 (0.86–1.10) | 0.96 (0.87–1.07) | 1.05 (0.88–1.25) | 1.17 (0.77–1.77) |
| <b>Entry dyspareunia, n=28 006</b>              |                      |                  |                  |                  |                  |
| Cases (%)                                       | 453 (3)              | 115 (3)          | 201 (3)          | 62 (4)           | 12 (5)           |
| Crude OR (95% CI)                               | Reference            | 0.98 (0.80–1.21) | 1.11 (0.94–1.31) | 1.33 (1.01–1.74) | 1.77 (0.98–3.19) |
| Adjusted OR* (95% CI)                           | Reference            | 0.98 (0.79–1.20) | 1.09 (0.92–1.30) | 1.29 (0.98–1.69) | 1.74 (0.97–3.15) |
| <b>Deep dyspareunia, n=28 006</b>               |                      |                  |                  |                  |                  |
| Cases (%)                                       | 1 035 (7)            | 265 (7)          | 355 (6)          | 103 (6)          | 14 (6)           |
| Crude OR (95% CI)                               | Reference            | 0.99 (0.86–1.14) | 0.85 (0.75–0.96) | 0.95 (0.77–1.18) | 0.88 (0.51–1.51) |
| Adjusted OR* (95% CI)                           | Reference            | 0.98 (0.85–1.13) | 0.87 (0.77–0.99) | 0.99 (0.80–1.22) | 0.88 (0.51–1.51) |

\*Adjusted for maternal age at first birth, calendar year at first birth, pre-pregnant body mass index, socio-occupational status, self-assessed health, disease, exercise in pregnancy, and smoking in pregnancy.  
CI: Confidence interval; OR: Odds ratio.

**Supplemental table 3: Sexual problems by mode of birth in participants with complete data.**

|                                                     | Only sponta-<br>neous births | Instrumental vagi-<br>nal birth, ever | Only c-sections  | Spontaneous VBAC | Instrumental VBAC | C-section after<br>vaginal birth |
|-----------------------------------------------------|------------------------------|---------------------------------------|------------------|------------------|-------------------|----------------------------------|
| <b>One or more sexual problem(s),<br/>n=32 638</b>  |                              |                                       |                  |                  |                   |                                  |
| Cases (%)                                           | 7 615 (37)                   | 1 643 (38)                            | 1 144 (42)       | 651 (37)         | 177 (44)          | 1 043 (39)                       |
| Crude OR (95% CI)                                   | Reference                    | 1.03 (0.96–1.10)                      | 1.21 (1.12–1.32) | 1.00 (0.90–1.10) | 1.34 (1.10–1.64)  | 1.10 (1.01–1.20)                 |
| Adjusted OR* (95% CI)                               | Reference                    | 1.02 (0.95–1.09)                      | 1.16 (1.07–1.26) | 1.00 (0.90–1.10) | 1.34 (1.10–1.64)  | 1.09 (1.00–1.18)                 |
| <b>Reduced desire, n=33 360</b>                     |                              |                                       |                  |                  |                   |                                  |
| Cases (%)                                           | 4 547 (22)                   | 956 (21)                              | 644 (23)         | 395 (22)         | 100 (24)          | 602 (22)                         |
| Crude OR (95% CI)                                   | Reference                    | 0.99 (0.92–1.07)                      | 1.07 (0.97–1.17) | 1.02 (0.91–1.14) | 1.17 (0.93–1.47)  | 1.03 (0.94–1.14)                 |
| Adjusted OR* (95% CI)                               | Reference                    | 0.99 (0.92–1.07)                      | 1.03 (0.94–1.13) | 1.02 (0.91–1.14) | 1.17 (0.93–1.47)  | 1.02 (0.93–1.13)                 |
| <b>Difficulty in obtaining orgasm,<br/>n=32 915</b> |                              |                                       |                  |                  |                   |                                  |
| Cases (%)                                           | 2 621 (13)                   | 590 (13)                              | 377 (14)         | 233 (13)         | 69 (17)           | 361 (13)                         |
| Crude OR (95% CI)                                   | Reference                    | 1.07 (0.97–1.18)                      | 1.08 (0.96–1.22) | 1.04 (0.90–1.20) | 1.43 (1.10–1.85)  | 1.08 (0.96–1.21)                 |
| Adjusted OR* (95% CI)                               | Reference                    | 1.06 (0.96–1.16)                      | 1.03 (0.92–1.16) | 1.04 (0.90–1.20) | 1.42 (1.09–1.84)  | 1.07 (0.95–1.21)                 |
| <b>Insufficient lubrication,<br/>n=33 033</b>       |                              |                                       |                  |                  |                   |                                  |
| Cases (%)                                           | 1 551 (7)                    | 351 (8)                               | 310 (11)         | 126 (7)          | 39 (10)           | 272 (10)                         |
| Crude OR (95% CI)                                   | Reference                    | 1.07 (0.95–1.21)                      | 1.55 (1.36–1.76) | 0.94 (0.79–1.13) | 1.31 (0.94–1.83)  | 1.40 (1.22–1.60)                 |
| Adjusted OR* (95% CI)                               | Reference                    | 1.00 (0.89–1.13)                      | 1.40 (1.23–1.60) | 0.95 (0.79–1.14) | 1.23 (0.88–1.72)  | 1.35 (1.18–1.55)                 |
| <b>Dyspareunia, n=33 140</b>                        |                              |                                       |                  |                  |                   |                                  |
| Cases (%)                                           | 1 858 (9)                    | 407 (9)                               | 417 (15)         | 164 (9)          | 48 (12)           | 282 (10)                         |
| Crude OR (95% CI)                                   | Reference                    | 1.03 (0.92–1.16)                      | 1.79 (1.60–2.00) | 1.03 (0.87–1.21) | 1.36 (1.00–1.84)  | 1.19 (1.05–1.36)                 |
| Adjusted OR* (95% CI)                               | Reference                    | 1.05 (0.93–1.17)                      | 1.76 (1.57–1.98) | 1.04 (0.88–1.23) | 1.39 (1.02–1.89)  | 1.16 (1.02–1.33)                 |
| <b>Entry dyspareunia, n=32 645</b>                  |                              |                                       |                  |                  |                   |                                  |
| Cases (%)                                           | 573 (3)                      | 148 (3)                               | 219 (8)          | 67 (4)           | 21 (5)            | 101 (4)                          |
| Crude OR (95% CI)                                   | Reference                    | 1.23 (1.02–1.48)                      | 3.04 (2.59–3.57) | 1.37 (1.06–1.77) | 1.93 (1.24–3.02)  | 1.38 (1.11–1.71)                 |
| Adjusted OR* (95% CI)                               | Reference                    | 1.19 (0.99–1.43)                      | 2.81 (2.38–3.32) | 1.37 (1.06–1.77) | 1.89 (1.20–2.95)  | 1.36 (1.09–1.68)                 |
| <b>Deep dyspareunia, n=32 645</b>                   |                              |                                       |                  |                  |                   |                                  |
| Cases (%)                                           | 1 308 (6)                    | 253 (6)                               | 206 (8)          | 96 (5)           | 29 (7)            | 182 (7)                          |
| Crude OR (95% CI)                                   | Reference                    | 0.91 (0.79–1.04)                      | 1.20 (1.03–1.40) | 0.84 (0.68–1.04) | 1.15 (0.79–1.69)  | 1.08 (0.92–1.27)                 |
| Adjusted OR* (95% CI)                               | Reference                    | 0.94 (0.82–1.09)                      | 1.21 (1.04–1.42) | 0.85 (0.69–1.06) | 1.21 (0.82–1.77)  | 1.05 (0.89–1.24)                 |

\*Adjusted for maternal age at first birth, calendar year at first birth, pre-pregnant body mass index, socio-occupational status, self-assessed health, disease, exercise in pregnancy, and smoking in pregnancy.  
C-section: Caesarean section; CI: Confidence interval; OR: Odds ratio; VBAC: Vaginal birth after caesarean section.

**Supplemental table 4: Sexual problems by degree of perineal tear in participants with complete data.**

|                                                 | No tear/first degree | Second degree    | Episiotomy       | Anal sphincter tear |
|-------------------------------------------------|----------------------|------------------|------------------|---------------------|
| <b>One or more sexual problem(s), n=25 655</b>  |                      |                  |                  |                     |
| Cases (%)                                       | 5 434 (37)           | 1 430 (38)       | 2 086 (36)       | 644 (37)            |
| Crude OR (95% CI)                               | Reference            | 1.04 (0.96–1.12) | 0.95 (0.89–1.01) | 1.00 (0.90–1.10)    |
| Adjusted OR* (95% CI)                           | Reference            | 1.03 (0.95–1.11) | 0.95 (0.89–1.02) | 0.98 (0.89–1.09)    |
| <b>Reduced sexual desire, n=26 194</b>          |                      |                  |                  |                     |
| Cases (%)                                       | 3 247 (22)           | 859 (23)         | 1 228 (21)       | 382 (22)            |
| Crude OR (95% CI)                               | Reference            | 1.03 (0.94–1.12) | 0.94 (0.87–1.01) | 0.99 (0.88–1.11)    |
| Adjusted OR* (95% CI)                           | Reference            | 1.01 (0.93–1.11) | 0.95 (0.88–1.02) | 0.98 (0.87–1.10)    |
| <b>Difficulty in obtaining orgasm, n=25 861</b> |                      |                  |                  |                     |
| Cases (%)                                       | 1 852 (13)           | 512 (14)         | 749 (13)         | 244 (14)            |
| Crude OR (95% CI)                               | Reference            | 1.09 (0.98–1.21) | 1.02 (0.93–1.12) | 1.13 (0.98–1.30)    |
| Adjusted OR* (95% CI)                           | Reference            | 1.07 (0.96–1.19) | 1.02 (0.93–1.11) | 1.11 (0.96–1.28)    |
| <b>Insufficient lubrication, n=25 945</b>       |                      |                  |                  |                     |
| Cases (%)                                       | 1 051 (7)            | 286 (8)          | 437 (8)          | 146 (8)             |
| Crude OR (95% CI)                               | Reference            | 1.06 (0.93–1.22) | 1.05 (0.93–1.18) | 1.18 (0.99–1.42)    |
| Adjusted OR* (95% CI)                           | Reference            | 1.08 (0.94–1.24) | 1.00 (0.89–1.12) | 1.16 (0.97–1.40)    |
| <b>Dyspareunia, n=26 028</b>                    |                      |                  |                  |                     |
| Cases (%)                                       | 1 348 (9)            | 340 (9)          | 519 (9)          | 160 (9)             |
| Crude OR (95% CI)                               | Reference            | 0.98 (0.86–1.11) | 0.96 (0.87–1.07) | 1.00 (0.84–1.18)    |
| Adjusted OR* (95% CI)                           | Reference            | 0.98 (0.86–1.11) | 0.98 (0.88–1.09) | 1.01 (0.85–1.20)    |
| <b>Entry dyspareunia, n=25 670</b>              |                      |                  |                  |                     |
| Cases (%)                                       | 415 (3)              | 103 (3)          | 187 (3)          | 65 (4)              |
| Crude OR (95% CI)                               | Reference            | 0.97 (0.78–1.20) | 1.14 (0.96–1.36) | 1.33 (1.02–1.74)    |
| Adjusted OR* (95% CI)                           | Reference            | 0.97 (0.78–1.21) | 1.12 (0.94–1.34) | 1.31 (1.00–1.71)    |
| <b>Deep dyspareunia, n=25 670</b>               |                      |                  |                  |                     |
| Cases (%)                                       | 954 (7)              | 245 (7)          | 326 (6)          | 101 (6)             |
| Crude OR (95% CI)                               | Reference            | 1.00 (0.87–1.16) | 0.85 (0.75–0.97) | 0.89 (0.72–1.09)    |
| Adjusted OR* (95% CI)                           | Reference            | 1.00 (0.86–1.15) | 0.88 (0.77–1.00) | 0.91 (0.74–1.13)    |

\*Adjusted for maternal age at first birth, calendar year at first birth, pre-pregnant body mass index, socio-occupational status, self-assessed health, disease, exercise in pregnancy, and smoking in pregnancy. CI: Confidence interval; OR: Odds ratio.

**Supplemental table 5: Exposures in participants and non-participants.**

|                                        | Participants in |      |                        |      |            |      |                              |      |
|----------------------------------------|-----------------|------|------------------------|------|------------|------|------------------------------|------|
|                                        | The DNBC*       |      | The maternal follow-up |      | This study |      | One or more sexual problems† |      |
| <b>Mode of birth, n (%)</b>            |                 |      |                        |      |            |      |                              |      |
| All                                    | 88 128          |      | 43 639                 |      | 37 417     |      | 35 514                       |      |
| Only spontaneous births                | 54 728          | (62) | 27 440                 | (63) | 23 608     | (63) | 22 496                       | (63) |
| Instrumental vaginal birth, ever       | 11 521          | (13) | 5 845                  | (13) | 5 003      | (13) | 4 736                        | (13) |
| Only c-sections                        | 8 386           | (10) | 3 895                  | (9)  | 3 244      | (9)  | 3 014                        | (9)  |
| Spontaneous VBAC                       | 4 565           | (5)  | 2 355                  | (5)  | 2 038      | (5)  | 1 931                        | (5)  |
| Instrumental VBAC                      | 1 080           | (1)  | 526                    | (1)  | 457        | (1)  | 431                          | (1)  |
| C-section after vaginal birth          | 7 848           | (9)  | 3 578                  | (8)  | 3 067      | (8)  | 2 906                        | (8)  |
| <b>Degree of perineal tear, n (%)‡</b> |                 |      |                        |      |            |      |                              |      |
| All                                    | 67 516          |      | 33 889                 |      | 29 253     |      | 27 864                       |      |
| No tear or first degree                | 38 625          | (57) | 19 094                 | (56) | 16 404     | (56) | 15 682                       | (56) |
| Second degree                          | 9 590           | (14) | 4 888                  | (14) | 4 267      | (15) | 4 047                        | (15) |
| Episiotomy                             | 15 025          | (22) | 7 662                  | (23) | 6 615      | (23) | 6 274                        | (23) |
| Anal sphincter tear                    | 4 276           | (6)  | 2 245                  | (7)  | 1 967      | (7)  | 1 861                        | (7)  |

\*Women with a live- or stillbirth in the DNBC.

†The outcome with highest percentage of missing data.

‡Women with a vaginal birth and no birth prior to 1994.

C-section: Caesarean section; DNBC: Danish National Birth Cohort; VBAC: Vaginal birth after caesarean section.

**Supplemental table 6: Frequent dyspareunia by mode of birth.**

|                                    | Only sponta-<br>neous births | Instrumental vagi-<br>nal birth, ever | Only c-sections  | Spontaneous VBAC | Instrumental VBAC | C-section after<br>vaginal birth |
|------------------------------------|------------------------------|---------------------------------------|------------------|------------------|-------------------|----------------------------------|
| <b>Dyspareunia, n=36 266</b>       |                              |                                       |                  |                  |                   |                                  |
| Cases (%)                          | 415 (2)                      | 97 (2)                                | 166 (5)          | 30 (3)           | 13 (3)            | 74 (3)                           |
| Crude OR (95% CI)                  | Reference                    | 1.10 (0.88–1.38)                      | 3.06 (2.54–3.68) | 0.84 (0.57–1.21) | 1.63 (0.93–2.85)  | 1.39 (1.08–1.78)                 |
| Adjusted OR* (95% CI)              | Reference                    | 1.09 (0.87–1.36)                      | 2.82 (2.32–3.41) | 0.83 (0.57–1.21) | 1.59 (0.90–2.78)  | 1.32 (1.02–1.69)                 |
| <b>Entry dyspareunia, n=35 720</b> |                              |                                       |                  |                  |                   |                                  |
| Cases (%)                          | 181 (1)                      | 42 (1)                                | 106 (4)          | 15 (1)           | 8 (2)             | 32 (1)                           |
| Crude OR (95% CI)                  | Reference                    | 1.10 (0.78–1.54)                      | 4.49 (2.36–3.51) | 0.96 (0.57–1.63) | 2.32 (1.13–4.73)  | 1.37 (0.94–2.00)                 |
| Adjusted OR* (95% CI)              | Reference                    | 1.02 (0.73–1.43)                      | 3.92 (3.03–5.05) | 0.95 (0.56–1.61) | 2.17 (1.06–4.45)  | 1.32 (0.90–1.93)                 |
| <b>Deep dyspareunia, n=35 720</b>  |                              |                                       |                  |                  |                   |                                  |
| Cases (%)                          | 263 (1)                      | 63 (1)                                | 73 (2)           | 18 (1)           | 8 (2)             | 44 (2)                           |
| Crude OR (95% CI)                  | Reference                    | 1.14 (0.86–1.50)                      | 2.10 (1.61–2.72) | 0.79 (0.49–1.28) | 1.58 (0.78–3.23)  | 1.30 (0.94–1.79)                 |
| Adjusted OR* (95% CI)              | Reference                    | 1.17 (0.89–1.55)                      | 2.01 (1.53–2.64) | 0.79 (0.49–1.28) | 1.60 (0.78–3.27)  | 1.21 (0.88–1.67)                 |

\*Adjusted for maternal age at first birth, calendar year at first birth, pre-pregnant body mass index, socio-occupational status, self-assessed health, disease, exercise in pregnancy, and smoking in pregnancy.  
C-section: Caesarean section; CI: Confidence interval; OR: Odds ratio; VBAC: Vaginal birth after caesarean section.



**Supplemental table 7: Participant Characteristics by Degree of Perineal Tear.**

|                                                | Degree of perineal tear |                             |                     |                         |                             |
|------------------------------------------------|-------------------------|-----------------------------|---------------------|-------------------------|-----------------------------|
|                                                | All<br>(n=29 253)       | None or first<br>(n=16 404) | Second<br>(n=4 267) | Episiotomy<br>(n=6 615) | Anal sphincter<br>(n=1 967) |
| <b>Age at first birth, n (%)</b>               |                         |                             |                     |                         |                             |
| <25                                            | 4 522 (15)              | 2 763 (17)                  | 563 (13)            | 993 (15)                | 203 (10)                    |
| 25–29                                          | 16 073 (55)             | 9 010 (55)                  | 2 394 (56)          | 3 566 (54)              | 1 103 (56)                  |
| 30–34                                          | 7 269 (25)              | 3 926 (24)                  | 1 085 (25)          | 1 716 (26)              | 542 (28)                    |
| ≥35                                            | 1 389 (5)               | 705 (4)                     | 225 (5)             | 340 (5)                 | 119 (6)                     |
| <b>Socio-occupational status, n (%)*</b>       |                         |                             |                     |                         |                             |
| Low                                            | 1 623 (6)               | 939 (6)                     | 227 (6)             | 367 (6)                 | 90 (5)                      |
| Middle                                         | 9 094 (33)              | 5 065 (33)                  | 1 367 (34)          | 2 081 (34)              | 581 (31)                    |
| High                                           | 16 804 (61)             | 9 459 (61)                  | 2 421 (60)          | 3 748 (60)              | 1 176 (64)                  |
| Missing                                        | 1 732                   | 941                         | 252                 | 419                     | 120                         |
| <b>Prepregnant BMI, n (%)*</b>                 |                         |                             |                     |                         |                             |
| <18.5                                          | 1 169 (4)               | 661 (4)                     | 120 (3)             | 320 (5)                 | 68 (4)                      |
| 18.5–24.9                                      | 19 579 (72)             | 11 142 (73)                 | 2 731 (69)          | 4 401 (72)              | 1 305 (72)                  |
| 25.0–29.9                                      | 4 801 (18)              | 2 573 (17)                  | 823 (21)            | 1 066 (17)              | 339 (19)                    |
| ≥30.0                                          | 1 654 (6)               | 923 (6)                     | 280 (7)             | 340 (6)                 | 111 (6)                     |
| Missing                                        | 2 050                   | 1 105                       | 313                 | 488                     | 144                         |
| <b>Exercise in pregnancy, min/week, n (%)*</b> |                         |                             |                     |                         |                             |
| None                                           | 16 147 (57)             | 8 981 (58)                  | 2 345 (58)          | 3 735 (60)              | 1 086 (59)                  |
| 1–180                                          | 9 112 (33)              | 5 120 (33)                  | 1 372 (34)          | 2 008 (32)              | 612 (33)                    |
| >180                                           | 2 289 (8)               | 1 382 (9)                   | 301 (7)             | 458 (7)                 | 148 (8)                     |
| Missing                                        | 1 705                   | 921                         | 249                 | 414                     | 121                         |
| <b>Smoking in pregnancy, n (%)*</b>            |                         |                             |                     |                         |                             |
| No smoking                                     | 22 390 (81)             | 12 437 (80)                 | 3 304 (81)          | 5 096 (81)              | 1 553 (83)                  |
| Smoking cessation                              | 2 461 (9)               | 1 415 (9)                   | 395 (10)            | 488 (8)                 | 163 (9)                     |

**Supplemental table 7: Participant characteristics by degree of perineal tear (continued).**

|                                     | Degree of perineal tear |                             |                     |                         |                             |
|-------------------------------------|-------------------------|-----------------------------|---------------------|-------------------------|-----------------------------|
|                                     | All<br>(n=29 253)       | None or first<br>(n=16 404) | Second<br>(n=4 267) | Episiotomy<br>(n=6 615) | Anal sphincter<br>(n=1 967) |
| Smoking                             | 2 930 (11)              | 1 749 (11)                  | 360 (9)             | 674 (11)                | 147 (8)                     |
| Missing                             | 1 472                   | 803                         | 208                 | 357                     | 104                         |
| <b>Self-assessed health, n (%)*</b> |                         |                             |                     |                         |                             |
| Very good                           | 15 564 (56)             | 8 814 (57)                  | 2 265 (56)          | 3 472 (56)              | 1 013 (54)                  |
| Normal                              | 11 408 (41)             | 6 357 (41)                  | 1 677 (42)          | 2 569 (41)              | 805 (43)                    |
| Not so good                         | 695 (3)                 | 361 (2)                     | 98 (2)              | 190 (3)                 | 46 (2)                      |
| Missing                             | 1 586                   | 872                         | 227                 | 384                     | 103                         |
| <b>Presence of disease, n (%)*†</b> |                         |                             |                     |                         |                             |
| No                                  | 16 450 (60)             | 9 049 (58)                  | 2 511 (62)          | 3 713 (60)              | 1 177 (63)                  |
| Yes                                 | 11 109 (40)             | 6 428 (42)                  | 1 518 (38)          | 2 484 (40)              | 679 (37)                    |
| Missing                             | 1 694                   | 927                         | 238                 | 418                     | 111                         |

\*Percentage of non-missing values.

†Diseases that, according to the women, had been confirmed by a physician, including hypertensive disorders, diseases of the heart, thyroid, or musculoskeletal system, epilepsy, diabetes, gynaecological diseases, and mental illness.

BMI: Body mass index.

**Supplemental table 8: Frequent dyspareunia by degree of perineal tear.**

|                                    | No tear/first degree | Second degree    | Episiotomy       | Anal sphincter tear |
|------------------------------------|----------------------|------------------|------------------|---------------------|
| <b>Dyspareunia, n=28 398</b>       |                      |                  |                  |                     |
| Cases (%)                          | 296 (2)              | 80 (2)           | 116 (2)          | 37 (2)              |
| Crude OR (95% CI)                  | Reference            | 1.04 (0.81–1.34) | 0.98 (0.78–1.21) | 1.05 (0.74–1.48)    |
| Adjusted OR* (95% CI)              | Reference            | 1.04 (0.81–1.34) | 0.99 (0.80–1.23) | 1.06 (0.75–1.50)    |
| <b>Entry dyspareunia, n=28 006</b> |                      |                  |                  |                     |
| Cases (%)                          | 122 (1)              | 32 (1)           | 53 (1)           | 20 (1)              |
| Crude OR (95% CI)                  | Reference            | 1.02 (0.69–1.50) | 1.09 (0.78–1.50) | 1.38 (0.86–2.22)    |
| Adjusted OR* (95% CI)              | Reference            | 1.01 (0.68–1.50) | 1.05 (0.76–1.46) | 1.32 (0.82–2.13)    |
| <b>Deep dyspareunia, n=28 006</b>  |                      |                  |                  |                     |
| Cases (%)                          | 199 (1)              | 55 (1)           | 67 (1)           | 24 (1)              |
| Crude OR (95% CI)                  | Reference            | 1.07 (0.79–1.45) | 0.84 (0.63–1.11) | 1.01 (0.66–1.55)    |
| Adjusted OR* (95% CI)              | Reference            | 1.08 (0.80–1.47) | 0.87 (0.66–1.15) | 1.09 (0.71–1.67)    |

\*Adjusted for maternal age at first birth, calendar year at first birth, pre-pregnant body mass index, socio-occupational status, self-assessed health, disease, exercise in pregnancy, and smoking in pregnancy.  
CI: Confidence interval; OR: Odds ratio.

**Supplemental table 9: Sexual problems by mode of birth in women who had their first birth in the DNBC.**

|                                                     | Only sponta-<br>neous births | Instrumental vag-<br>inal birth, ever | Only c-sections  | Spontaneous<br>VBAC | Instrumental<br>VBAC | C-section after<br>vaginal birth |
|-----------------------------------------------------|------------------------------|---------------------------------------|------------------|---------------------|----------------------|----------------------------------|
| <b>One or more sexual problem(s),<br/>n=17 587</b>  |                              |                                       |                  |                     |                      |                                  |
| Cases (%)                                           | 4 069 (38)                   | 920 (39)                              | 865 (41)         | 342 (39)            | 90 (46)              | 517 (40)                         |
| Crude OR (95% CI)                                   | Reference                    | 1.07 (0.98–1.18)                      | 1.17 (1.06–1.28) | 1.04 (0.90–1.19)    | 1.43 (1.08–1.90)     | 1.10 (0.98–1.24)                 |
| Adjusted OR* (95% CI)                               | Reference                    | 1.07 (0.98–1.18)                      | 1.15 (1.04–1.27) | 1.04 (0.90–1.20)    | 1.43 (1.08–1.91)     | 1.09 (0.97–1.23)                 |
| <b>Reduced desire, n=17 941</b>                     |                              |                                       |                  |                     |                      |                                  |
| Cases (%)                                           | 2 466 (22)                   | 541 (23)                              | 500 (23)         | 211 (23)            | 52 (26)              | 295 (22)                         |
| Crude OR (95% CI)                                   | Reference                    | 1.02 (0.92–1.13)                      | 1.05 (0.94–1.17) | 1.05 (0.90–1.24)    | 1.22 (0.89–1.68)     | 1.00 (0.87–1.15)                 |
| Adjusted OR* (95% CI)                               | Reference                    | 1.02 (0.92–1.14)                      | 1.04 (0.93–1.17) | 1.06 (0.90–1.24)    | 1.22 (0.89–1.68)     | 0.98 (0.86–1.13)                 |
| <b>Difficulty in obtaining orgasm,<br/>n=17 730</b> |                              |                                       |                  |                     |                      |                                  |
| Cases (%)                                           | 1 397 (13)                   | 332 (14)                              | 285 (13)         | 131 (15)            | 33 (17)              | 176 (14)                         |
| Crude OR (95% CI)                                   | Reference                    | 1.11 (0.98–1.27)                      | 1.05 (0.92–1.21) | 1.16 (0.96–1.41)    | 1.37 (0.94–2.00)     | 1.06 (0.90–1.26)                 |
| Adjusted OR* (95% CI)                               | Reference                    | 1.11 (0.97–1.26)                      | 1.04 (0.91–1.20) | 1.16 (0.96–1.41)    | 1.38 (0.94–2.01)     | 1.06 (0.89–1.25)                 |
| <b>Insufficient lubrication,<br/>n=17 784</b>       |                              |                                       |                  |                     |                      |                                  |
| Cases (%)                                           | 738 (7)                      | 173 (7)                               | 220 (10)         | 55 (6)              | 21 (11)              | 124 (10)                         |
| Crude OR (95% CI)                                   | Reference                    | 1.09 (0.92–1.29)                      | 1.59 (1.35–1.86) | 0.90 (0.68–1.19)    | 1.65 (1.04–2.61)     | 1.44 (1.18–1.76)                 |
| Adjusted OR* (95% CI)                               | Reference                    | 1.03 (0.87–1.23)                      | 1.38 (1.17–1.62) | 0.91 (0.68–1.20)    | 1.64 (1.03–2.60)     | 1.45 (1.19–1.77)                 |
| <b>Dyspareunia, n=17 840</b>                        |                              |                                       |                  |                     |                      |                                  |
| Cases (%)                                           | 995 (9)                      | 230 (10)                              | 312 (15)         | 82 (9)              | 28 (14)              | 157 (12)                         |
| Crude OR (95% CI)                                   | Reference                    | 1.07 (0.92–1.25)                      | 1.71 (1.49–1.96) | 1.00 (0.79–1.27)    | 1.65 (1.10–2.48)     | 1.35 (1.13–1.62)                 |
| Adjusted OR* (95% CI)                               | Reference                    | 1.09 (0.93–1.26)                      | 1.69 (1.47–1.94) | 1.00 (0.79–1.27)    | 1.68 (1.12–2.53)     | 1.31 (1.09–1.57)                 |
| <b>Entry dyspareunia, n=17 573</b>                  |                              |                                       |                  |                     |                      |                                  |
| Cases (%)                                           | 300 (3)                      | 80 (3)                                | 158 (8)          | 33 (4)              | 11 (6)               | 54 (4)                           |
| Crude OR (95% CI)                                   | Reference                    | 1.24 (0.97–1.60)                      | 2.87 (2.36–3.51) | 1.35 (0.93–1.94)    | 2.09 (1.13–3.88)     | 1.52 (1.13–2.04)                 |
| Adjusted OR* (95% CI)                               | Reference                    | 1.20 (0.93–1.54)                      | 2.56 (2.08–3.14) | 1.35 (0.93–1.95)    | 2.06 (1.11–3.83)     | 1.52 (1.13–2.04)                 |
| <b>Deep dyspareunia, n=17 573</b>                   |                              |                                       |                  |                     |                      |                                  |
| Cases (%)                                           | 721 (7)                      | 151 (6)                               | 160 (8)          | 50 (6)              | 18 (9)               | 182 (8)                          |
| Crude OR (95% CI)                                   | Reference                    | 0.97 (0.81–1.16)                      | 1.16 (0.97–1.39) | 0.83 (0.62–1.12)    | 1.42 (0.87–2.32)     | 1.27 (1.03–1.57)                 |
| Adjusted OR* (95% CI)                               | Reference                    | 1.00 (0.83–1.20)                      | 1.21 (1.01–1.45) | 0.84 (0.62–1.12)    | 1.48 (0.90–2.42)     | 1.21 (0.98–1.50)                 |

\*Adjusted for maternal age at first birth, calendar year at first birth, pre-pregnant body mass index, socio-occupational status, self-assessed health, disease, exercise in pregnancy, and smoking in pregnancy.  
C-section: Caesarean section; CI: Confidence interval; DNBC: Danish National Birth Cohort; OR: Odds ratio; VBAC: Vaginal birth after caesarean section.

**Supplemental table 10: Sexual problems by degree of perineal tear in women who had their first birth in the DNBC.**

|                                                 | No tear/first degree | Second degree    | Episiotomy       | Anal sphincter tear |
|-------------------------------------------------|----------------------|------------------|------------------|---------------------|
| <b>One or more sexual problem(s), n=15 496</b>  |                      |                  |                  |                     |
| Cases (%)                                       | 3 251 (38)           | 1 087 (39)       | 1 120 (37)       | 480 (39)            |
| Crude OR (95% CI)                               | Reference            | 1.03 (0.95–1.13) | 0.94 (0.87–1.03) | 1.01 (0.90–1.14)    |
| Adjusted OR* (95% CI)                           | Reference            | 1.04 (0.95–1.13) | 0.94 (0.86–1.02) | 1.02 (0.90–1.15)    |
| <b>Reduced sexual desire, n=15 794</b>          |                      |                  |                  |                     |
| Cases (%)                                       | 1 971 (23)           | 650 (23)         | 655 (21)         | 289 (23)            |
| Crude OR (95% CI)                               | Reference            | 0.99 (0.90–1.10) | 0.91 (0.82–1.00) | 1.00 (0.87–1.15)    |
| Adjusted OR* (95% CI)                           | Reference            | 1.00 (0.90–1.11) | 0.91 (0.82–1.01) | 1.01 (0.88–1.16)    |
| <b>Difficulty in obtaining orgasm, n=15 610</b> |                      |                  |                  |                     |
| Cases (%)                                       | 1 108 (13)           | 386 (14)         | 402 (13)         | 173 (14)            |
| Crude OR (95% CI)                               | Reference            | 1.07 (0.95–1.22) | 1.01 (0.90–1.15) | 1.08 (0.91–1.28)    |
| Adjusted OR* (95% CI)                           | Reference            | 1.07 (0.95–1.21) | 1.01 (0.89–1.14) | 1.08 (0.91–1.28)    |
| <b>Insufficient lubrication, n=15 656</b>       |                      |                  |                  |                     |
| Cases (%)                                       | 572 (7)              | 208 (7)          | 224 (7)          | 107 (9)             |
| Crude OR (95% CI)                               | Reference            | 1.12 (0.95–1.32) | 1.10 (0.94–1.29) | 1.31 (1.05–1.62)    |
| Adjusted OR* (95% CI)                           | Reference            | 1.11 (0.94–1.31) | 1.07 (0.91–1.25) | 1.27 (1.03–1.58)    |
| <b>Dyspareunia, n=15 705</b>                    |                      |                  |                  |                     |
| Cases (%)                                       | 834 (10)             | 261 (9)          | 269 (9)          | 128 (10)            |
| Crude OR (95% CI)                               | Reference            | 0.94 (0.82–1.09) | 0.89 (0.77–1.03) | 1.05 (0.87–1.28)    |
| Adjusted OR* (95% CI)                           | Reference            | 0.95 (0.82–1.10) | 0.89 (0.77–1.03) | 1.08 (0.89–1.32)    |
| <b>Entry dyspareunia, n=15 494</b>              |                      |                  |                  |                     |
| Cases (%)                                       | 247 (3)              | 78 (3)           | 102 (3)          | 51 (4)              |
| Crude OR (95% CI)                               | Reference            | 0.96 (0.74–1.24) | 1.16 (0.92–1.46) | 1.43 (1.04–1.94)    |
| Adjusted OR* (95% CI)                           | Reference            | 0.95 (0.73–1.23) | 1.13 (0.90–1.43) | 1.41 (1.03–1.92)    |
| <b>Deep dyspareunia, n=15 494</b>               |                      |                  |                  |                     |
| Cases (%)                                       | 603 (7)              | 191 (7)          | 172 (6)          | 82 (7)              |
| Crude OR (95% CI)                               | Reference            | 0.96 (0.81–1.14) | 0.78 (0.66–0.93) | 0.92 (0.73–1.17)    |
| Adjusted OR* (95% CI)                           | Reference            | 0.97 (0.82–1.15) | 0.79 (0.66–0.94) | 0.97 (0.76–1.22)    |

\*Adjusted for maternal age at first birth, calendar year at first birth, pre-pregnant body mass index, socio-occupational status, self-assessed health, disease, exercise in pregnancy, and smoking in pregnancy. CI: Confidence interval; DNBC: Danish National Birth Cohort; OR: Odds ratio.

Supplemental table 11: Sexual problems by mode of birth in participants without vaginismus.

|                                                     | Only sponta-<br>neous births | Instrumental vagi-<br>nal birth, ever | Only c-sections  | Spontaneous VBAC | Instrumental VBAC | C-section after<br>vaginal birth |
|-----------------------------------------------------|------------------------------|---------------------------------------|------------------|------------------|-------------------|----------------------------------|
| <b>One or more sexual<br/>problem(s), n=35 343</b>  |                              |                                       |                  |                  |                   |                                  |
| Cases (%)                                           | 8 196 (37)                   | 1 759 (37)                            | 1 229 (41)       | 705 (37)         | 185 (43)          | 1 119 (39)                       |
| Crude OR (95% CI)                                   | Reference                    | 1.02 (0.96–1.09)                      | 1.21 (1.12–1.31) | 1.00 (0.91–1.11) | 1.33 (1.10–1.61)  | 1.10 (1.02–1.20)                 |
| Adjusted OR* (95% CI)                               | Reference                    | 1.02 (0.95–1.08)                      | 1.17 (1.08–1.27) | 1.00 (0.91–1.11) | 1.33 (1.09–1.61)  | 1.09 (1.01–1.18)                 |
| <b>Reduced desire,<br/>n=36 139</b>                 |                              |                                       |                  |                  |                   |                                  |
| Cases (%)                                           | 4 917 (22)                   | 1 034 (21)                            | 702 (23)         | 431 (22)         | 103 (24)          | 639 (22)                         |
| Crude OR (95% CI)                                   | Reference                    | 0.99 (0.92–1.07)                      | 1.08 (0.99–1.18) | 1.03 (0.93–1.15) | 1.13 (0.90–1.41)  | 1.02 (0.93–1.11)                 |
| Adjusted OR* (95% CI)                               | Reference                    | 0.99 (0.92–1.07)                      | 1.04 (0.95–1.14) | 1.03 (0.92–1.15) | 1.13 (0.90–1.41)  | 1.00 (0.91–1.10)                 |
| <b>Difficulty in obtaining<br/>orgasm, n=35 650</b> |                              |                                       |                  |                  |                   |                                  |
| Cases (%)                                           | 2 822 (13)                   | 631 (13)                              | 406 (13)         | 252 (13)         | 71 (17)           | 390 (13)                         |
| Crude OR (95% CI)                                   | Reference                    | 1.06 (0.97–1.16)                      | 1.08 (0.97–1.21) | 1.04 (0.91–1.20) | 1.39 (1.07–1.80)  | 1.09 (0.97–1.22)                 |
| Adjusted OR* (95% CI)                               | Reference                    | 1.05 (0.96–1.16)                      | 1.05 (0.94–1.18) | 1.04 (0.91–1.20) | 1.38 (1.07–1.79)  | 1.08 (0.97–1.21)                 |
| <b>Insufficient lubrication,<br/>n=35 777</b>       |                              |                                       |                  |                  |                   |                                  |
| Cases (%)                                           | 1 663 (7)                    | 370 (8)                               | 318 (11)         | 131 (7)          | 42 (10)           | 290 (10)                         |
| Crude OR (95% CI)                                   | Reference                    | 1.05 (0.94–1.18)                      | 1.48 (1.30–1.67) | 0.91 (0.76–1.09) | 1.35 (0.98–1.87)  | 1.39 (1.22–1.59)                 |
| Adjusted OR* (95% CI)                               | Reference                    | 0.99 (0.88–1.12)                      | 1.36 (1.19–1.55) | 0.89 (0.74–1.08) | 1.28 (0.92–1.77)  | 1.35 (1.18–1.54)                 |
| <b>Dyspareunia, n=35 894</b>                        |                              |                                       |                  |                  |                   |                                  |
| Cases (%)                                           | 1 958 (9)                    | 431 (9)                               | 432 (14)         | 160 (8)          | 51 (12)           | 301 (10)                         |
| Crude OR (95% CI)                                   | Reference                    | 1.04 (0.93–1.16)                      | 1.75 (1.56–1.96) | 0.94 (0.80–1.12) | 1.40 (1.04–1.89)  | 1.22 (1.07–1.38)                 |
| Adjusted OR* (95% CI)                               | Reference                    | 1.06 (0.95–1.18)                      | 1.73 (1.54–1.94) | 0.95 (0.80–1.12) | 1.42 (1.06–1.92)  | 1.18 (1.04–1.35)                 |
| <b>Entry dyspareunia,<br/>n=35 352</b>              |                              |                                       |                  |                  |                   |                                  |
| Cases (%)                                           | 613 (3)                      | 153 (3)                               | 223 (8)          | 60 (3)           | 21 (5)            | 109 (4)                          |
| Crude OR (95% CI)                                   | Reference                    | 1.19 (0.99–1.42)                      | 2.88 (2.46–3.38) | 1.14 (0.87–1.49) | 1.84 (1.18–2.88)  | 1.40 (1.13–1.72)                 |
| Adjusted OR* (95% CI)                               | Reference                    | 1.15 (0.96–1.37)                      | 2.71 (2.30–3.19) | 1.14 (0.87–1.49) | 1.80 (1.15–2.82)  | 1.38 (1.12–1.70)                 |
| <b>Deep dyspareunia,<br/>n=35 352</b>               |                              |                                       |                  |                  |                   |                                  |
| Cases (%)                                           | 1 367 (6)                    | 269 (6)                               | 222 (8)          | 98 (5)           | 32 (8)            | 195 (7)                          |
| Crude OR (95% CI)                                   | Reference                    | 0.93 (0.81–1.06)                      | 1.24 (1.07–1.44) | 0.82 (0.66–1.01) | 1.25 (0.87–1.80)  | 1.12 (0.96–1.30)                 |
| Adjusted OR* (95% CI)                               | Reference                    | 0.96 (0.84–1.10)                      | 1.25 (1.07–1.45) | 0.83 (0.67–1.03) | 1.29 (0.90–1.87)  | 1.08 (0.93–1.27)                 |

\*Adjusted for maternal age at first birth, calendar year at first birth, pre-pregnant body mass index, socio-occupational status, self-assessed health, disease, exercise in pregnancy, and smoking in pregnancy.  
C-section: Caesarean section; CI: Confidence interval; OR: Odds ratio; VBAC: Vaginal birth after caesarean section.

Supplemental figure 1: Directed acyclic graph

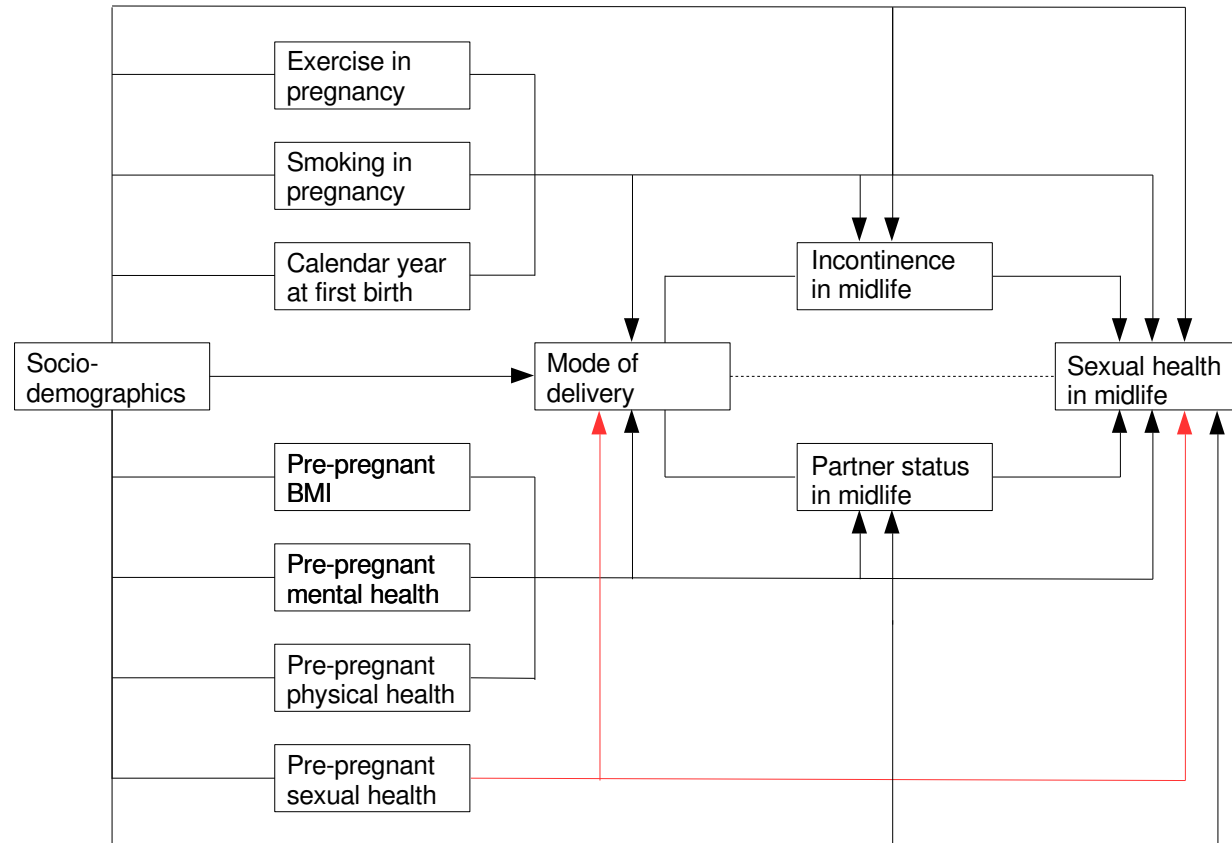

The red arrows represent unadjusted confounding from pre-pregnant sexual health. The dotted line represents the study question. BMI: Body mass index.
